# Supplementary material for: Assessment of health-related quality of life in hypertensive hemodialysis patients
Source: PeerJ. 2022 Jan 3;10:e12690. doi: 10.7717/peerj.12690 (PMC8734469; doi:10.7717/peerj.12690)
Supplement: Supplemental Information 1 [file peerj-10-12690-s001.xlsx]

## Sheet: Sheet1
Gender	Age	Employment Status	Marital Status	Education	Smoking Status	Alcohol Consumption	Exercise	Salt Intake	Risk Factor	BMI	Systolic Blood Pressure	Diastolic Blood Pressure	When u were diagnosed with hypertension? (Months ago)	When dialysis was initiated? (Months ago)	Family History of Hypertension	MOBILITY	SELF-CARE	USUAL ACTIVITIES (e.g. work, study, housework, family or leisure activities)	PAIN / DISCOMFORT	ANXIETY / DEPRESSION	health	1st follow up data	MOBILITY	SELF-CARE	USUAL ACTIVITIES (e.g. work, study, housework, family or leisure activities)	PAIN / DISCOMFORT	ANXIETY / DEPRESSION	health	Systolic Blood Pressure	Diastolic Blood Pressure	Weight	Height	BMI	2nd Follow up data	MOBILITY	SELF-CARE	USUAL ACTIVITIES	PAIN / DISCOMFORT	ANXIETY / DEPRESSION	health	Systolic Blood Pressure	Diastolic Blood Pressure	Weight	Height	BMI
Male	53	Retired	Married	Higher secondary	Non smoker	No	No exercise	Low	Hepatitis	20.06	160	100	72	38	no	I have slight problems in walking about	I have no problems washing or dressing myself	I have moderate problems doing my usual activities	I have severe pain or discomfort	I am slightly anxious or depressed	70		I have slight problems in walking about	I have no problems washing or dressing myself	I have slight problems doing my usual activities	I have slight pain or discomfort	I am slightly anxious or depressed	73	170	96	46	5.4	17.4		I have moderate problems in walking about	I have slight problems washing or dressing myself	I have slight problems doing my usual activities	I have slight pain or discomfort	I am slightly anxious or depressed	75	155	98	45	5.4	17
Female	34		Married	Middle	Non smoker	No	No exercise	Low	Hepatitis	17.1	150	95	102	102	no	I have slight problems in walking about	I have no problems washing or dressing myself	I have moderate problems doing my usual activities	I have moderate pain or discomfort	I am extremely anxious or depressed	65		I have moderate problems in walking about	I have slight problems washing or dressing myself	I have moderate problems doing my usual activities	I have slight pain or discomfort	I am slightly anxious or depressed	78	160	87	47	5.5	17.2		I have moderate problems in walking about	I have slight problems washing or dressing myself	I have slight problems doing my usual activities	I have slight pain or discomfort	I am slightly anxious or depressed	68	148	95	47	5.5	17.2
Male	70	Not capable of working	Married	Not educated	Ex-smoker	No	No exercise	Normal	Hepatitis	23.4	180	90	18	8	no	I have severe problems in walking about	I have no problems washing or dressing myself	I have severe problems doing my usual activities	I have severe pain or discomfort	I am not anxious or depressed	40		I have moderate problems in walking about	I have slight problems washing or dressing myself	I have moderate problems doing my usual activities	I have slight pain or discomfort	I am slightly anxious or depressed	45	150	80	71	5.8	23.8		I have moderate problems in walking about	I have moderate problems washing or dressing myself	I have slight problems doing my usual activities	I have slight pain or discomfort	I am slightly anxious or depressed	44	170	90	72	5.8	24.1
Female	60		Married	Secondary	Non smoker	No	Daily	Low	Not any	19	180	80	4	30	no	I have moderate problems in walking about	I have no problems washing or dressing myself	I have severe problems doing my usual activities	I have slight pain or discomfort	I am extremely anxious or depressed	50		I have moderate problems in walking about	I have no problems washing or dressing myself	I have severe problems doing my usual activities	I have slight pain or discomfort	I am slightly anxious or depressed	55	185	90	43	5	18.5		I have severe problems in walking about	I have moderate problems washing or dressing myself	I have slight problems doing my usual activities	I have slight pain or discomfort	I am slightly anxious or depressed	52	175	80	43	5	18.5
Female	60	Not capable of working	Married	Secondary	Non smoker	No	Some times	Low	Diabetes mellitus	24.1	150	70	4	18	yes	I have severe problems in walking about	I have slight problems washing or dressing myself	I am unable to do my usual activities	I have severe pain or discomfort	I am extremely anxious or depressed	30		I have no problems in walking about	I have no problems washing or dressing myself	I have no problems doing my usual activities	I have slight pain or discomfort	I am slightly anxious or depressed	33	150	78	77	5.11	23.7		I have severe problems in walking about	I have severe problems washing or dressing myself	I have slight problems doing my usual activities	I have slight pain or discomfort	I am slightly anxious or depressed	35	140	70	77	5.11	23.7
Male	53	Doing a job	Married	Middle	Ex-smoker	No	No exercise	Low	Not any	20.7	150	90	120	24	yes	I have moderate problems in walking about	I have no problems washing or dressing myself	I have no problems doing my usual activities	I have moderate pain or discomfort	I am slightly anxious or depressed	60		I have no problems in walking about	I have no problems washing or dressing myself	I have no problems doing my usual activities	I have slight pain or discomfort	I am slightly anxious or depressed	65	160	80	63	5.8	21.1		I am unable to walk about	I have severe problems washing or dressing myself	I have slight problems doing my usual activities	I have slight pain or discomfort	I am slightly anxious or depressed	60	148	88	64	5.8	21.5
Female	27	Not capable of working	Single	Graduate	Non smoker	No	No exercise	Normal	Not any	19.1	180	120	168	18	yes	I have no problems in walking about	I have no problems washing or dressing myself	I have slight problems doing my usual activities	I have no pain or discomfort	I am not anxious or depressed	85		I have no problems in walking about	I have no problems washing or dressing myself	I have no problems doing my usual activities	I have slight pain or discomfort	I am slightly anxious or depressed	80	190	100	48	5.3	18.7		I have slight problems in walking about	I have no problems washing or dressing myself	I have slight problems doing my usual activities	I have slight pain or discomfort	I am slightly anxious or depressed	88	170	111	49	5.3	19.1
Female	50	Not capable of working	Married	Not educated	Non smoker	No	No exercise	Normal	Not any	24.3	140	90	18	18	no	I have no problems in walking about	I have no problems washing or dressing myself	I have slight problems doing my usual activities	I have slight pain or discomfort	I am extremely anxious or depressed	70		I have slight problems in walking about	I have no problems washing or dressing myself	I have slight problems doing my usual activities	I have slight pain or discomfort	I am slightly anxious or depressed	65	165	95	59	5.2	23.8		I have slight problems in walking about	I have no problems washing or dressing myself	I have slight problems doing my usual activities	I have slight pain or discomfort	I am slightly anxious or depressed	70	138	89	58	5.2	23.4
Male	66	Retired	Married	Secondary	Ex-smoker	No	Daily	Normal	Not any	31.4	162	94	72	60	no	I have moderate problems in walking about	I have no problems washing or dressing myself	I have moderate problems doing my usual activities	I have moderate pain or discomfort	I am slightly anxious or depressed	45		I have moderate problems in walking about	I have no problems washing or dressing myself	I have moderate problems doing my usual activities	I have moderate pain or discomfort	I am slightly anxious or depressed	50	150	80	93	5.8	31.2		I have slight problems in walking about	I have no problems washing or dressing myself	I have slight problems doing my usual activities	I have slight pain or discomfort	I am slightly anxious or depressed	47	160	90	92	5.8	30.8
male	40	Not capable of working	Married	Not educated	Non smoker	No	Daily	Low	Not any	28.7	161	79	24	12	no	I have no problems in walking about	I have no problems washing or dressing myself	I have slight problems doing my usual activities	I have no pain or discomfort	I am not anxious or depressed	80		I have severe problems in walking about	I have no problems washing or dressing myself	I have moderate problems doing my usual activities	I have moderate pain or discomfort	I am slightly anxious or depressed	78	170	88	82	5.7	28.3		I have moderate problems in walking about	I have no problems washing or dressing myself	I have slight problems doing my usual activities	I have slight pain or discomfort	I am slightly anxious or depressed	80	155	80	82	5.7	28.3
Female	65	Not capable of working	Married	Primary	Non smoker	No	Some times	Normal	Cardio vascular disease, Diabetes mellitus	25.9	199	74	48	24	no	I have severe problems in walking about	I have severe problems washing or dressing myself	I am unable to do my usual activities	I have moderate pain or discomfort	I am moderately anxious or depressed	40		I have severe problems in walking about	I have slight problems washing or dressing myself	I have severe problems doing my usual activities	I have moderate pain or discomfort	I am slightly anxious or depressed	45	180	70	53.7	4.7	27.5		I have slight problems in walking about	I have no problems washing or dressing myself	I have slight problems doing my usual activities	I have slight pain or discomfort	I am slightly anxious or depressed	42	190	75	54	4.7	27.7
Female	75	Retired	Married	Middle	Ex-smoker	No	No exercise	Low	not any	26.2	170	63	24	24	no	I have moderate problems in walking about	I have no problems washing or dressing myself	I have slight problems doing my usual activities	I have slight pain or discomfort	I am not anxious or depressed	90		I have severe problems in walking about	I have slight problems washing or dressing myself	I have severe problems doing my usual activities	I have moderate pain or discomfort	I am slightly anxious or depressed	90	150	69	74.6	5.6	26.5		I have no problems in walking about	I have no problems washing or dressing myself	I have slight problems doing my usual activities	I have slight pain or discomfort	I am slightly anxious or depressed	90	168	65	75	5.6	26.7
Male	42	Not capable of working	Married	Middle	Smoker	No	No exercise	Low	Not any	20.8	158	98	48	36	yes	I have severe problems in walking about	I have moderate problems washing or dressing myself	I have no problems doing my usual activities	I have moderate pain or discomfort	I am moderately anxious or depressed	70		I have slight problems in walking about	I have no problems washing or dressing myself	I have severe problems doing my usual activities	I have moderate pain or discomfort	I am slightly anxious or depressed	75	170	100	61	5.7	21.1		I have no problems in walking about	I have no problems washing or dressing myself	I have slight problems doing my usual activities	I have slight pain or discomfort	I am slightly anxious or depressed	72	155	95	61	5.7	21.1
Female	45	Not capable of working	Married	Not educated	Non smoker	No	Some times	Low	Diabetes mellitus	29.8	154	69	120	12	no	I have slight problems in walking about	I have no problems washing or dressing myself	I have no problems doing my usual activities	I have slight pain or discomfort	I am not anxious or depressed	70		I have slight problems in walking about	I have no problems washing or dressing myself	I have severe problems doing my usual activities	I have moderate pain or discomfort	I am slightly anxious or depressed	70	157	73	60	4.8	29.8		I have slight problems in walking about	I have no problems washing or dressing myself	I have slight problems doing my usual activities	I have slight pain or discomfort	I am slightly anxious or depressed	70	150	70	59	4.8	29.2
Female	60	Not capable of working	Married	Not educated	Non smoker	No	No exercise	Low	Respiratory disorder	19.5	170	90	48	48	no	I have severe problems in walking about	I have moderate problems washing or dressing myself	I have severe problems doing my usual activities	I have severe pain or discomfort	I am extremely anxious or depressed	30		I have severe problems in walking about	I have slight problems washing or dressing myself	I have severe problems doing my usual activities	I have moderate pain or discomfort	I am slightly anxious or depressed	30	160	87	45	5	19.5		I have slight problems in walking about	I have no problems washing or dressing myself	I have slight problems doing my usual activities	I have slight pain or discomfort	I am slightly anxious or depressed	33	164	89	45	5	19.4
Female	61	Not capable of working	Married	Not educated	Non smoker	No	Daily	Low	Not any	36.7	140	80	18	18	yes	I have moderate problems in walking about	I have no problems washing or dressing myself	I have moderate problems doing my usual activities	I have severe pain or discomfort	I am not anxious or depressed	60		I have slight problems in walking about	I have no problems washing or dressing myself	I have severe problems doing my usual activities	I have moderate pain or discomfort	I am slightly anxious or depressed	60	150	80	74	4.8	36.7		I have slight problems in walking about	I have no problems washing or dressing myself	I have slight problems doing my usual activities	I have slight pain or discomfort	I am slightly anxious or depressed	62	139	80	73	4.8	36.1
Female	60	Not capable of working	Married	Not educated	Non smoker	No	No exercise	Low	Cardio vascular disease, Diabetes mellitus, Hepatitis	24.3	190	90	120	18	yes	I am unable to walk about	I am unable to wash or dress myself	I am unable to do my usual activities	I have slight pain or discomfort	I am extremely anxious or depressed	30		I have severe problems in walking about	I have no problems washing or dressing myself	I have no problems doing my usual activities	I have moderate pain or discomfort	I am slightly anxious or depressed	40	167	82	59.8	5.2	24.1		I have moderate problems in walking about	I have no problems washing or dressing myself	I have slight problems doing my usual activities	I have slight pain or discomfort	I am slightly anxious or depressed	35	180	88	59	5.2	23.8
Female	55	Not capable of working	Married	Not educated	Non smoker	No	No exercise	Normal	Diabetes mellitus, Hepatitis	20.9	150	90	48	6	no	I am unable to walk about	I am unable to wash or dress myself	I am unable to do my usual activities	I have slight pain or discomfort	I am not anxious or depressed	50		I have no problems in walking about	I have no problems washing or dressing myself	I am unable to do my usual activities	I have moderate pain or discomfort	I am slightly anxious or depressed	45	163	80	44	4.9	20.9		I have moderate problems in walking about	I have no problems washing or dressing myself	I have slight problems doing my usual activities	I have slight pain or discomfort	I am slightly anxious or depressed	53	148	87	44	4.9	20.9
Female	50	Not capable of working	Married	Primary	Non smoker	No	Daily	Low	Diabetes mellitus, Hepatitis	32.5	180	90	120	6	yes	I have slight problems in walking about	I have no problems washing or dressing myself	I have moderate problems doing my usual activities	I have slight pain or discomfort	I am moderately anxious or depressed	60		I have slight problems in walking about	I have no problems washing or dressing myself	I have slight problems doing my usual activities	I have severe pain or discomfort	I am slightly anxious or depressed	57	190	98	76	5	32.7		I have no problems in walking about	I have no problems washing or dressing myself	I have slight problems doing my usual activities	I have slight pain or discomfort	I am slightly anxious or depressed	62	176	89	76	5	32.7
Male	60	Not capable of working	Married	Not educated	Ex-smoker	No	No exercise	Low	Diabetes mellitus, Hepatitis	21.2	180	90	36	18	no	I am unable to walk about	I am unable to wash or dress myself	I am unable to do my usual activities	I have severe pain or discomfort	I am not anxious or depressed	60		I have moderate problems in walking about	I have no problems washing or dressing myself	I have slight problems doing my usual activities	I have severe pain or discomfort	I am slightly anxious or depressed	65	190	105	51	5.1	21.2		I have no problems in walking about	I have no problems washing or dressing myself	I have slight problems doing my usual activities	I have slight pain or discomfort	I am slightly anxious or depressed	66	170	86	51	5.1	21.2
Female	37	Doing a job	Married	Secondary	Ex-smoker	No	No exercise	Low	Not any	17.7	172	95	36	24	no	I have no problems in walking about	I have no problems washing or dressing myself	I have slight problems doing my usual activities	I have slight pain or discomfort	I am moderately anxious or depressed	50		I have moderate problems in walking about	I have slight problems washing or dressing myself	I have moderate problems doing my usual activities	I have severe pain or discomfort	I am slightly anxious or depressed	55	160	90	48.3	5.4	18.3		I have no problems in walking about	I have no problems washing or dressing myself	I have slight problems doing my usual activities	I have slight pain or discomfort	I am slightly anxious or depressed	54	168	94	49	5.4	18.5
Male	37	Doing a job	Married	Not educated	Ex-smoker	No	Daily	Normal	Not any	19.7	180	60	1	12	no	I have no problems in walking about	I have no problems washing or dressing myself	I have no problems doing my usual activities	I have slight pain or discomfort	I am not anxious or depressed	70		I have slight problems in walking about	I have no problems washing or dressing myself	I have moderate problems doing my usual activities	I have severe pain or discomfort	I am slightly anxious or depressed	65	178	75	64	5.11	19.7		I have no problems in walking about	I have no problems washing or dressing myself	I have slight problems doing my usual activities	I have slight pain or discomfort	I am slightly anxious or depressed	70	171	70	64	5.11	19.7
Female	61	Not capable of working	Married	Secondary	Non smoker	No	No exercise	Low	Diabetes mellitus	16.5	190	74	120	18	no	I have moderate problems in walking about	I have slight problems washing or dressing myself	I have severe problems doing my usual activities	I have slight pain or discomfort	I am moderately anxious or depressed	60		I have slight problems in walking about	I have no problems washing or dressing myself	I have moderate problems doing my usual activities	I have severe pain or discomfort	I am slightly anxious or depressed	60	200	100	45	5.5	16.5		I have slight problems in walking about	I have no problems washing or dressing myself	I have slight problems doing my usual activities	I have slight pain or discomfort	I am slightly anxious or depressed	63	180	75	46	5.5	16.9
Female	50	Not capable of working	Married	Secondary	Non smoker	No	No exercise	Low	Not any	24.2	153	67	24	12	no	I have moderate problems in walking about	I have severe problems washing or dressing myself	I am unable to do my usual activities	I have moderate pain or discomfort	I am moderately anxious or depressed	40		I have moderate problems in walking about	I have moderate problems washing or dressing myself	I have severe problems doing my usual activities	I have severe pain or discomfort	I am slightly anxious or depressed	45	140	80	55	5	23.7		I have moderate problems in walking about	I have no problems washing or dressing myself	I have slight problems doing my usual activities	I have slight pain or discomfort	I am slightly anxious or depressed	42	150	70	54	5	23.3
Female	25	Doing a job	Single	Graduate	Non smoker	No	Daily	Normal	Not any	21.2	140	80	12	12	no	I have slight problems in walking about	I have no problems washing or dressing myself	I have no problems doing my usual activities	I have no pain or discomfort	I am not anxious or depressed	90		I have severe problems in walking about	I have moderate problems washing or dressing myself	I have severe problems doing my usual activities	I have severe pain or discomfort	I am slightly anxious or depressed	90	159	96	51	5.1	21.2		I have moderate problems in walking about	I have no problems washing or dressing myself	I have slight problems doing my usual activities	I have slight pain or discomfort	I am slightly anxious or depressed	90	139	81	50	5.1	20.8
male	29	Doing a job	Single	Secondary	Non smoker	No	Daily	Low	Hepatitis	20.1	180	107	36	24	no	I have no problems in walking about	I have no problems washing or dressing myself	I have no problems doing my usual activities	I have moderate pain or discomfort	I am slightly anxious or depressed	70		I have no problems in walking about	I have no problems washing or dressing myself	I have no problems doing my usual activities	I have severe pain or discomfort	I am slightly anxious or depressed	65	158	80	57.6	5.7	19.9		I have severe problems in walking about	I have no problems washing or dressing myself	I have slight problems doing my usual activities	I have slight pain or discomfort	I am slightly anxious or depressed	70	176	100	57	5.7	19.7
Female	37	Not capable of working	Married	Primary	Non smoker	No	Some times	Low	Not any	32.9	140	103	12	1	no	I have no problems in walking about	I have no problems washing or dressing myself	I have no problems doing my usual activities	I have no pain or discomfort	I am not anxious or depressed	95		I have severe problems in walking about	I have slight problems washing or dressing myself	I am unable to do my usual activities	I have severe pain or discomfort	I am slightly anxious or depressed	95	168	100	76	5	32.9		I have severe problems in walking about	I have no problems washing or dressing myself	I have slight problems doing my usual activities	I have slight pain or discomfort	I am slightly anxious or depressed	95	138	90	76	5	32.9
male	53	Retired	Married	Secondary	Ex-smoker	No	No exercise	Normal	Diabetes mellitus, Hepatitis	22.4	150	90	24	12	no	I have severe problems in walking about	I have moderate problems washing or dressing myself	I am unable to do my usual activities	I have severe pain or discomfort	I am moderately anxious or depressed	50		I have severe problems in walking about	I have severe problems washing or dressing myself	I am unable to do my usual activities	I have severe pain or discomfort	I am slightly anxious or depressed	55	155	90	76	6	22.7		I have severe problems in walking about	I have no problems washing or dressing myself	I have moderate problems doing my usual activities	I have slight pain or discomfort	I am slightly anxious or depressed	54	145	88	76	6	22.7
Male	50	Not capable of working	Married	Middle	Ex-smoker	No	Daily	Low	Paralysis	19	200	100	120	18	yes	I have moderate problems in walking about	I have moderate problems washing or dressing myself	I am unable to do my usual activities	I have severe pain or discomfort	I am not anxious or depressed	50		I have severe problems in walking about	I have no problems washing or dressing myself	I am unable to do my usual activities	I have severe pain or discomfort	I am slightly anxious or depressed	55	170	76	51	5.7	18.3		I have severe problems in walking about	I am unable to wash or dress myself	I have moderate problems doing my usual activities	I have slight pain or discomfort	I am slightly anxious or depressed	52	190	96	52	5.7	18
Male	63	Not capable of working	Married	Higher secondary	Ex-smoker	No	No exercise	Normal	Diabetes mellitus	23.3	180	90	60	60	no	I have moderate problems in walking about	I have no problems washing or dressing myself	I have severe problems doing my usual activities	I have moderate pain or discomfort	I am not anxious or depressed	60		I am unable to walk about	I have no problems washing or dressing myself	I am unable to do my usual activities	I have severe pain or discomfort	I am slightly anxious or depressed	60	187	98	77	6	23		I am unable to walk about	I am unable to wash or dress myself	I have moderate problems doing my usual activities	I have slight pain or discomfort	I am slightly anxious or depressed	65	171	87	76	6	22.7
Female	40	Not capable of working	Married	Not educated	Non smoker	No	Daily	Low	Not any	18.6	140	85	18	18	no	I have severe problems in walking about	I have moderate problems washing or dressing myself	I am unable to do my usual activities	I have severe pain or discomfort	I am slightly anxious or depressed	70		I am unable to walk about	I have no problems washing or dressing myself	I am unable to do my usual activities	I have severe pain or discomfort	I am slightly anxious or depressed	75	170	93	43	5	18.6		I am unable to walk about	I am unable to wash or dress myself	I have moderate problems doing my usual activities	I have slight pain or discomfort	I am moderately anxious or depressed	73	136	83	43	5	18.6
Female	37	Not capable of working	Married	Primary	Non smoker	No	Some times	Low	Not any	32.9	140	103	12	1	no	I have no problems in walking about	I have no problems washing or dressing myself	I have no problems doing my usual activities	I have no pain or discomfort	I am not anxious or depressed	95		I have slight problems in walking about	I have no problems washing or dressing myself	I have slight problems doing my usual activities	I have slight pain or discomfort	I am moderately anxious or depressed	95	148	90	76	5	32.9		I am unable to walk about	I am unable to wash or dress myself	I have moderate problems doing my usual activities	I have slight pain or discomfort	I am moderately anxious or depressed	95	138	100	77	5	33.2
Male	69	Retired	Married	Graduate	Ex-smoker	No	Some times	Normal	Hepatitis	19.9	140	90	96	96	no	I have moderate problems in walking about	I have no problems washing or dressing myself	I have slight problems doing my usual activities	I have moderate pain or discomfort	I am extremely anxious or depressed	60		I have moderate problems in walking about	I have no problems washing or dressing myself	I have slight problems doing my usual activities	I have slight pain or discomfort	I am moderately anxious or depressed	55	145	80	62	5.9	20.2		I am unable to walk about	I am unable to wash or dress myself	I have moderate problems doing my usual activities	I have slight pain or discomfort	I am moderately anxious or depressed	62	137	87	63	5.9	20.5
Male	44	Doing a job	Married	Middle	Non smoker	No	Some times	Normal	Not any	18.7	185	91	24	24	yes	I have moderate problems in walking about	I have no problems washing or dressing myself	I have no problems doing my usual activities	I have slight pain or discomfort	I am slightly anxious or depressed	50		I have no problems in walking about	I have no problems washing or dressing myself	I have slight problems doing my usual activities	I have slight pain or discomfort	I am moderately anxious or depressed	55	160	85	64	6.1	18.7		I have moderate problems in walking about	I have slight problems washing or dressing myself	I have moderate problems doing my usual activities	I have slight pain or discomfort	I am moderately anxious or depressed	60	180	90	64	6.1	18.7
Male	52	Doing a job	Married	Graduate	Non smoker	No	No exercise	Low	Not any	41.8	222	86	60	60	no	I have severe problems in walking about	I have slight problems washing or dressing myself	I have moderate problems doing my usual activities	I have moderate pain or discomfort	I am not anxious or depressed	40		I have slight problems in walking about	I have no problems washing or dressing myself	I have no problems doing my usual activities	I have slight pain or discomfort	I am moderately anxious or depressed	45	185	97	124	5.8	41.6		I have moderate problems in walking about	I have moderate problems washing or dressing myself	I have moderate problems doing my usual activities	I have slight pain or discomfort	I am moderately anxious or depressed	48	200	84	122	5.8	40.9
Male	63	Retired	Married	Secondary	Non smoker	No	Daily	Normal	Not any	22.2	170	90	120	96	no	I have moderate problems in walking about	I have no problems washing or dressing myself	I have no problems doing my usual activities	I have moderate pain or discomfort	I am slightly anxious or depressed	50		I have slight problems in walking about	I have no problems washing or dressing myself	I have no problems doing my usual activities	I have slight pain or discomfort	I am moderately anxious or depressed	45	180	100	69	5.9	22.5		I have severe problems in walking about	I have moderate problems washing or dressing myself	I have moderate problems doing my usual activities	I have slight pain or discomfort	I am moderately anxious or depressed	55	165	86	70	5.9	22.8
Female	31	Not capable of working	Married	Secondary	Non smoker	No	No exercise	Normal	Not any	17.4	160	90	120	120	yes	I have moderate problems in walking about	I have no problems washing or dressing myself	I have moderate problems doing my usual activities	I have moderate pain or discomfort	I am not anxious or depressed	60		I have slight problems in walking about	I have no problems washing or dressing myself	I have no problems doing my usual activities	I have slight pain or discomfort	I am moderately anxious or depressed	55	160	85	43	5.2	17.4		I have severe problems in walking about	I have severe problems washing or dressing myself	I have moderate problems doing my usual activities	I have slight pain or discomfort	I am moderately anxious or depressed	60	155	88	42	5.2	16.9
Male	75	Not capable of working	Married	Middle	Non smoker	No	No exercise	Normal	Cardio vascular disease, Diabetes mellitus	30.5	140	80	180	30	yes	I have severe problems in walking about	I am unable to wash or dress myself	I have severe problems doing my usual activities	I have severe pain or discomfort	I am extremely anxious or depressed	40		I have slight problems in walking about	I have no problems washing or dressing myself	I have no problems doing my usual activities	I have slight pain or discomfort	I am moderately anxious or depressed	50	155	90	77.7	5.3	30.3		I have slight problems in walking about	I have no problems washing or dressing myself	I have moderate problems doing my usual activities	I have slight pain or discomfort	I am moderately anxious or depressed	45	140	80	77	5.3	30.1
Male	22	Doing a job	Single	Secondary	Non smoker	No	No exercise	Low	Not any	20.7	140	70	24	3	no	I have no problems in walking about	I have no problems washing or dressing myself	I have no problems doing my usual activities	I have moderate pain or discomfort	I am not anxious or depressed	90		I have no problems in walking about	I have no problems washing or dressing myself	I have no problems doing my usual activities	I have slight pain or discomfort	I am moderately anxious or depressed	87	158	78	54	5.3	21.1		I have slight problems in walking about	I have no problems washing or dressing myself	I have moderate problems doing my usual activities	I have slight pain or discomfort	I am moderately anxious or depressed	90	138	70	54	5.3	21.1
Female	64	Not capable of working	Married	Higher secondary	Non smoker	No	No exercise	Low	Diabetes mellitus	26.3	188	90	180	3	no	I am unable to walk about	I am unable to wash or dress myself	I am unable to do my usual activities	I have severe pain or discomfort	I am slightly anxious or depressed	40		I have no problems in walking about	I have no problems washing or dressing myself	I have no problems doing my usual activities	I have slight pain or discomfort	I am moderately anxious or depressed	45	190	100	70	5.4	26.3		I have slight problems in walking about	I have no problems washing or dressing myself	I have moderate problems doing my usual activities	I have moderate pain or discomfort	I am moderately anxious or depressed	46	182	89	70	5.4	26.3
Female	62	Not capable of working	Married	Not educated	Non smoker	No	No exercise	Normal	Not any	17.3	188	85	120	3	no	I have severe problems in walking about	I have slight problems washing or dressing myself	I have severe problems doing my usual activities	I have severe pain or discomfort	I am moderately anxious or depressed	30		I have moderate problems in walking about	I have no problems washing or dressing myself	I have slight problems doing my usual activities	I have slight pain or discomfort	I am moderately anxious or depressed	45	195	90	45.5	5.4	17.2		I have moderate problems in walking about	I have no problems washing or dressing myself	I have moderate problems doing my usual activities	I have moderate pain or discomfort	I am moderately anxious or depressed	40	185	85	45	5.4	17
Male	35	Doing a job	Married	Middle	Non smoker	No	Daily	Low	Hepatitis	20.7	180	90	3	3	no	I have severe problems in walking about	I have slight problems washing or dressing myself	I have severe problems doing my usual activities	I have slight pain or discomfort	I am not anxious or depressed	40		I have severe problems in walking about	I have no problems washing or dressing myself	I have slight problems doing my usual activities	I have moderate pain or discomfort	I am moderately anxious or depressed	36	160	75	54	5.3	21.1		I have severe problems in walking about	I have no problems washing or dressing myself	I have moderate problems doing my usual activities	I have moderate pain or discomfort	I am moderately anxious or depressed	44	176	87	55	5.3	21.5
Male	39	Not capable of working	Married	Graduate	Non smoker	No	No exercise	Low	Hepatitis, TB	17.3	150	80	48	12	no	I have severe problems in walking about	I have slight problems washing or dressing myself	I have severe problems doing my usual activities	I have severe pain or discomfort	I am moderately anxious or depressed	50		I have moderate problems in walking about	I have slight problems washing or dressing myself	I have moderate problems doing my usual activities	I have moderate pain or discomfort	I am moderately anxious or depressed	55	155	80	50	5.7	17.3		I have severe problems in walking about	I have no problems washing or dressing myself	I have moderate problems doing my usual activities	I have moderate pain or discomfort	I am moderately anxious or depressed	56	147	80	50	5.7	17.3
Female	60	Not capable of working	Married	Not educated	Non smoker	No	No exercise	Normal	Hepatitis	17.5	150	80	96	60	no	I have severe problems in walking about	I have moderate problems washing or dressing myself	I have moderate problems doing my usual activities	I have severe pain or discomfort	I am moderately anxious or depressed	40		I have moderate problems in walking about	I have slight problems washing or dressing myself	I have moderate problems doing my usual activities	I have moderate pain or discomfort	I am moderately anxious or depressed	45	160	88	42	5.1	17.5		I have no problems in walking about	I have no problems washing or dressing myself	I have moderate problems doing my usual activities	I have moderate pain or discomfort	I am moderately anxious or depressed	48	149	80	43	5.1	17.9
Male	20	Not capable of working	Single	Secondary	Non smoker	No	Daily	Low	Hepatitis	22.5	130	80	48	48	no	I have severe problems in walking about	I have no problems washing or dressing myself	I have severe problems doing my usual activities	I have moderate pain or discomfort	I am moderately anxious or depressed	40		I have severe problems in walking about	I have moderate problems washing or dressing myself	I have moderate problems doing my usual activities	I have moderate pain or discomfort	I am moderately anxious or depressed	50	140	82	54.5	5.1	22.7		I have no problems in walking about	I have no problems washing or dressing myself	I have moderate problems doing my usual activities	I have moderate pain or discomfort	I am moderately anxious or depressed	45	130	80	55	5.1	22.9
Male	32	Not capable of working	Married	Middle	Non smoker	No	Daily	Normal	Not any	18.5	190	80	24	24	no	I have no problems in walking about	I have no problems washing or dressing myself	I have severe problems doing my usual activities	I have no pain or discomfort	I am not anxious or depressed	60		I have slight problems in walking about	I have no problems washing or dressing myself	I have moderate problems doing my usual activities	I have moderate pain or discomfort	I am moderately anxious or depressed	60	167	68	52	5.6	18.5		I have no problems in walking about	I have no problems washing or dressing myself	I have moderate problems doing my usual activities	I have moderate pain or discomfort	I am moderately anxious or depressed	60	187	80	51	5.6	18.1
Female	35	Not capable of working	Married	Secondary	Non smoker	No	No exercise		Not any	21.1	150	90	180	24	no	I have severe problems in walking about	I have no problems washing or dressing myself	I have severe problems doing my usual activities	I have slight pain or discomfort	I am not anxious or depressed	70		I have moderate problems in walking about	I have no problems washing or dressing myself	I have moderate problems doing my usual activities	I have moderate pain or discomfort	I am moderately anxious or depressed	70	160	95	49	5	21.1		I have no problems in walking about	I have no problems washing or dressing myself	I have moderate problems doing my usual activities	I have moderate pain or discomfort	I am moderately anxious or depressed	70	148	88	49	5	21.1
Male	31	Doing a job	Single	Secondary	Ex-smoker	No	Daily	Low	Hepatitis	22.8	169	90	48	24	yes	I have slight problems in walking about	I have no problems washing or dressing myself	I have no problems doing my usual activities	I have moderate pain or discomfort	I am moderately anxious or depressed	50		I have moderate problems in walking about	I have severe problems washing or dressing myself	I have severe problems doing my usual activities	I have moderate pain or discomfort	I am moderately anxious or depressed	55	170	90	66	5.7	22.8		I have slight problems in walking about	I have no problems washing or dressing myself	I have moderate problems doing my usual activities	I have moderate pain or discomfort	I am moderately anxious or depressed	59	165	87	65.5	5.7	22.8
Male	50	Retired	Married	Secondary	Ex-smoker	No	Some times	Low	Hepatitis	22.4	160	70	60	36	no	I have severe problems in walking about	I have severe problems washing or dressing myself	I have moderate problems doing my usual activities	I have slight pain or discomfort	I am not anxious or depressed	60		I have slight problems in walking about	I have no problems washing or dressing myself	I have severe problems doing my usual activities	I have moderate pain or discomfort	I am moderately anxious or depressed	60	145	60	63	5.6	22.4		I have slight problems in walking about	I have no problems washing or dressing myself	I have moderate problems doing my usual activities	I have moderate pain or discomfort	I am moderately anxious or depressed	60	156	70	63	5.6	22.4
Female	48	Housewife	Married	Not educated	Non smoker	No	Daily	Low	Diabetes mellitus, Hepatitis	24.6	140	70	24	12	no	I have moderate problems in walking about	I have moderate problems washing or dressing myself	I have moderate problems doing my usual activities	I have severe pain or discomfort	I am extremely anxious or depressed	60		I have moderate problems in walking about	I have no problems washing or dressing myself	I have severe problems doing my usual activities	I have moderate pain or discomfort	I am moderately anxious or depressed	63	157	78	59	5.1	24.6		I have moderate problems in walking about	I have no problems washing or dressing myself	I have moderate problems doing my usual activities	I have moderate pain or discomfort	I am moderately anxious or depressed	66	137	70	59	5.1	25
Female	35	Not capable of working	Married	Not educated	Non smoker	No	No exercise	Normal	Not any	28.6	159	101	72	48	yes	I have no problems in walking about	I have no problems washing or dressing myself	I have slight problems doing my usual activities	I have slight pain or discomfort	I am not anxious or depressed	90		I have slight problems in walking about	I have no problems washing or dressing myself	I have no problems doing my usual activities	I have moderate pain or discomfort	I am moderately anxious or depressed	90	140	80	59	4.9	28.1		I have moderate problems in walking about	I have no problems washing or dressing myself	I have moderate problems doing my usual activities	I have moderate pain or discomfort	I am moderately anxious or depressed	90	155	98	58	4.9	25
Female	47	Housewife	Married	Not educated	Non smoker	No	No exercise	Low	Not any	22.7	140	70	180	24	no	I have severe problems in walking about	I have moderate problems washing or dressing myself	I am unable to do my usual activities	I have severe pain or discomfort	I am moderately anxious or depressed	40		I have slight problems in walking about	I have no problems washing or dressing myself	I have no problems doing my usual activities	I have moderate pain or discomfort	I am moderately anxious or depressed	45	160	90	46	4.8	22.7		I have severe problems in walking about	I have no problems washing or dressing myself	I have moderate problems doing my usual activities	I have moderate pain or discomfort	I am moderately anxious or depressed	50	138	70	46	4.8	22.7
Male	43	Private business	Married	Secondary	Non smoker	No	No exercise	Low	Not any	20.2	175	93	36	6	yes	I have severe problems in walking about	I have no problems washing or dressing myself	I have severe problems doing my usual activities	I have severe pain or discomfort	I am extremely anxious or depressed	50		I have no problems in walking about	I have no problems washing or dressing myself	I have no problems doing my usual activities	I have moderate pain or discomfort	I am moderately anxious or depressed	55	190	11`0	55.7	5.5	20.4		I have no problems in walking about	I have no problems washing or dressing myself	I have moderate problems doing my usual activities	I have moderate pain or discomfort	I am moderately anxious or depressed	57	170	93	56	5.5	20.5
Female	35	No working	Married	Not educated	Non smoker	No	Daily	Low	Not any	23.8	157	73	120	12	yes	I have slight problems in walking about	I have no problems washing or dressing myself	I have no problems doing my usual activities	I have slight pain or discomfort	I am moderately anxious or depressed	60		I have no problems in walking about	I have no problems washing or dressing myself	I am unable to do my usual activities	I have moderate pain or discomfort	I am moderately anxious or depressed	60	167	85	60	5.2	24.2		I have no problems in walking about	I have no problems washing or dressing myself	I have severe problems doing my usual activities	I have moderate pain or discomfort	I am moderately anxious or depressed	65	155	73	60	5.2	24.2
Female	55	Housewife	Married	Middle	Non smoker	No	Some times	Normal	Not any	22.8	150	70	264	12	yes	I have no problems in walking about	I have no problems washing or dressing myself	I have no problems doing my usual activities	I have moderate pain or discomfort	I am not anxious or depressed	80		I have slight problems in walking about	I have no problems washing or dressing myself	I have slight problems doing my usual activities	I have severe pain or discomfort	I am moderately anxious or depressed	80	160	75	63	5.6	22.4		I have no problems in walking about	I have no problems washing or dressing myself	I have severe problems doing my usual activities	I have moderate pain or discomfort	I am moderately anxious or depressed	80	150	70	62	5.6	22.1
Male	59	Not capable of working	Married	Secondary	Non smoker	No	Daily	Normal	Diabetes mellitus	21.8	146	60	300	36	yes	I have moderate problems in walking about	I have slight problems washing or dressing myself	I have moderate problems doing my usual activities	I have slight pain or discomfort	I am slightly anxious or depressed	70		I have slight problems in walking about	I have no problems washing or dressing myself	I have slight problems doing my usual activities	I have severe pain or discomfort	I am moderately anxious or depressed	65	155	70	63	5.7	21.8		I have no problems in walking about	I have no problems washing or dressing myself	I have severe problems doing my usual activities	I have moderate pain or discomfort	I am moderately anxious or depressed	70	146	60	63	5.7	21.8
Male	59	Not capable of working	Married	Secondary	Non smoker	No	Daily	Normal	Diabetes mellitus	21.8	146	60	300	48	yes	I have moderate problems in walking about	I have slight problems washing or dressing myself	I have moderate problems doing my usual activities	I have slight pain or discomfort	I am slightly anxious or depressed	70		I have no problems in walking about	I have no problems washing or dressing myself	I have slight problems doing my usual activities	I have severe pain or discomfort	I am moderately anxious or depressed	65	155	70	63	5.7	21.8		I have no problems in walking about	I have no problems washing or dressing myself	I have severe problems doing my usual activities	I have moderate pain or discomfort	I am moderately anxious or depressed	70	146	60	63	5.7	21.8
Female	32	Not capable of working	Single	Secondary	Non smoker	No	Some times	Normal	Not any	21.8	180	100	12	30	no	I have moderate problems in walking about	I have no problems washing or dressing myself	I have no problems doing my usual activities	I have slight pain or discomfort	I am slightly anxious or depressed	80		I have slight problems in walking about	I have no problems washing or dressing myself	I have moderate problems doing my usual activities	I have severe pain or discomfort	I am moderately anxious or depressed	80	183	103	61.9	5.7	21.4		I have moderate problems in walking about	I have no problems washing or dressing myself	I have severe problems doing my usual activities	I have moderate pain or discomfort	I am moderately anxious or depressed	80	175	97	61	5.7	21.1
Male	36	Not capable of working	Married	Not educated	Non smoker	No	No exercise	Normal	Hepatitis	22.8	150	70	24	24	no	I have moderate problems in walking about	I have slight problems washing or dressing myself	I have severe problems doing my usual activities	I have moderate pain or discomfort	I am moderately anxious or depressed	50		I have slight problems in walking about	I have no problems washing or dressing myself	I have moderate problems doing my usual activities	I have severe pain or discomfort	I am moderately anxious or depressed	55	170	95	66	5.7	22.8		I have moderate problems in walking about	I have no problems washing or dressing myself	I have severe problems doing my usual activities	I have moderate pain or discomfort	I am moderately anxious or depressed	54	147	70	66	5.7	22.8
male	39	Not capable of working	Married	Not educated	Non smoker	No	No exercise	Low	Not any	18.2	140	80	120	1	no	I have slight problems in walking about	I have no problems washing or dressing myself	I have moderate problems doing my usual activities	I have severe pain or discomfort	I am moderately anxious or depressed	50		I have moderate problems in walking about	I have no problems washing or dressing myself	I have moderate problems doing my usual activities	I have severe pain or discomfort	I am moderately anxious or depressed	60	160	85	48	5.4	18.2		I have moderate problems in walking about	I have no problems washing or dressing myself	I have severe problems doing my usual activities	I have moderate pain or discomfort	I am moderately anxious or depressed	58	140	80	49	5.4	18.5
Male	32	Not capable of working	Married	Secondary	Non smoker	No	Daily	Low	Hepatitis	19.6	175	107	24	24	no	I have moderate problems in walking about	I have no problems washing or dressing myself	I have no problems doing my usual activities	I have severe pain or discomfort	I am not anxious or depressed	65		I have severe problems in walking about	I have moderate problems washing or dressing myself	I have severe problems doing my usual activities	I have severe pain or discomfort	I am moderately anxious or depressed	70	155	90	55	5.6	19.6		I have severe problems in walking about	I have no problems washing or dressing myself	I have severe problems doing my usual activities	I have moderate pain or discomfort	I am moderately anxious or depressed	70	170	103	55	5.6	19.6
Male	45	Not capable of working	Married	Secondary	Non smoker	No	No exercise	Normal	Diabetes mellitus, Hepatitis	26.8	152	71	108	36	no	I am unable to walk about	I have moderate problems washing or dressing myself	I am unable to do my usual activities	I have moderate pain or discomfort	I am not anxious or depressed	30		I have severe problems in walking about	I have severe problems washing or dressing myself	I have severe problems doing my usual activities	I have severe pain or discomfort	I am moderately anxious or depressed	35	173	78	72.4	5.5	26.6		I have no problems in walking about	I have no problems washing or dressing myself	I have severe problems doing my usual activities	I have moderate pain or discomfort	I am moderately anxious or depressed	40	150	71	72	5.5	26.4
Male	45	Not capable of working	Married	Not educated	Non smoker	No	No exercise	Normal	Hepatitis	17.9	157	90	36	12	no	I have severe problems in walking about	I have moderate problems washing or dressing myself	I have severe problems doing my usual activities	I have moderate pain or discomfort	I am not anxious or depressed	50		I have moderate problems in walking about	I have no problems washing or dressing myself	I have severe problems doing my usual activities	I have severe pain or discomfort	I am moderately anxious or depressed	53	164	80	54	5.9	17.6		I have no problems in walking about	I have no problems washing or dressing myself	I have severe problems doing my usual activities	I have moderate pain or discomfort	I am moderately anxious or depressed	58	154	90	54	5.9	17.6
Male	40	Not capable of working	Married	Middle	Smoker	No	Some times	Low	Hepatitis	30.8	200	95	1	1	yes	I have moderate problems in walking about	I have no problems washing or dressing myself	I have no problems doing my usual activities	I have severe pain or discomfort	I am extremely anxious or depressed	45		I have severe problems in walking about	I have no problems washing or dressing myself	I have severe problems doing my usual activities	I have severe pain or discomfort	I am moderately anxious or depressed	50	188	88	74	5.1	30.8		I have severe problems in walking about	I am unable to wash or dress myself	I have severe problems doing my usual activities	I have moderate pain or discomfort	I am moderately anxious or depressed	50	192	93	74	5.1	30.8
Male	72	Not capable of working	Married	Primary	Ex-smoker	No	No exercise	Low	Hepatitis	25.3	153	82	84	36	no	I have severe problems in walking about	I am unable to wash or dress myself	I am unable to do my usual activities	I have severe pain or discomfort	I am extremely anxious or depressed	35		I have severe problems in walking about	I have no problems washing or dressing myself	I have severe problems doing my usual activities	I have severe pain or discomfort	I am moderately anxious or depressed	35	170	80	70.5	5.6	25.1		I have moderate problems in walking about	I have slight problems washing or dressing myself	I have severe problems doing my usual activities	I have moderate pain or discomfort	I am moderately anxious or depressed	39	151	81	70	5.6	24.9
Female	70	Not capable of working	Married	Not educated	Non smoker	No	No exercise	Normal	Hepatitis	20.7	169	77	3	8	no	I have moderate problems in walking about	I have severe problems washing or dressing myself	I have severe problems doing my usual activities	I have extreme pain or discomfort	I am extremely anxious or depressed	30		I have severe problems in walking about	I have no problems washing or dressing myself	I have severe problems doing my usual activities	I have severe pain or discomfort	I am moderately anxious or depressed	35	170	82	53	5.3	20.7		I have no problems in walking about	I have slight problems washing or dressing myself	I have severe problems doing my usual activities	I have moderate pain or discomfort	I am moderately anxious or depressed	40	164	74	53	5.3	20.7
Male	51	Not capable of working	Married	Not educated	Ex-smoker	No	No exercise	Low	Cardio vascular disease	23	148	60	48	1	no	I have moderate problems in walking about	I have moderate problems washing or dressing myself	I have moderate problems doing my usual activities	I have moderate pain or discomfort	I am not anxious or depressed	50		I have moderate problems in walking about	I have no problems washing or dressing myself	I have severe problems doing my usual activities	I have severe pain or discomfort	I am moderately anxious or depressed	55	140	62	76.5	6	22.9		I have slight problems in walking about	I have slight problems washing or dressing myself	I have severe problems doing my usual activities	I have moderate pain or discomfort	I am moderately anxious or depressed	54	147	70	76	6	22.7
Male	58	Private business	Married	Middle	Non smoker	No	No exercise	Low	Diabetes mellitus	24	154	74	36	12	no	I have slight problems in walking about	I have no problems washing or dressing myself	I have slight problems doing my usual activities	I have no pain or discomfort	I am not anxious or depressed	70		I have slight problems in walking about	I have no problems washing or dressing myself	I have no problems doing my usual activities	I have severe pain or discomfort	I am moderately anxious or depressed	80	160	80	87	6.3	24		I have moderate problems in walking about	I have slight problems washing or dressing myself	I have severe problems doing my usual activities	I have moderate pain or discomfort	I am moderately anxious or depressed	75	153	74	87	6.3	24
Female	62	not working	Married	Higher secondary	Non smoker	No	No exercise	Low	Not any	22.1	178	71	24	15	yes	I have severe problems in walking about	I have severe problems washing or dressing myself	I am unable to do my usual activities	I have moderate pain or discomfort	I am severely anxious or depressed	70		I have severe problems in walking about	I have no problems washing or dressing myself	I have no problems doing my usual activities	I have severe pain or discomfort	I am moderately anxious or depressed	70	170	70	53	5.1	22.1		I have severe problems in walking about	I have slight problems washing or dressing myself	I have severe problems doing my usual activities	I have moderate pain or discomfort	I am moderately anxious or depressed	70	175	71	54	5.1	22.5
Female	41	not working	Married	Secondary	Non smoker	No	Some times	Normal	Not any	22.1	150	90	108	60	no	I have moderate problems in walking about	I have slight problems washing or dressing myself	I have slight problems doing my usual activities	I have moderate pain or discomfort	I am moderately anxious or depressed	40		I have no problems in walking about	I have no problems washing or dressing myself	I have no problems doing my usual activities	I have severe pain or discomfort	I am moderately anxious or depressed	50	155	90	52.6	5.1	21.9		I have severe problems in walking about	I have moderate problems washing or dressing myself	I have severe problems doing my usual activities	I have moderate pain or discomfort	I am moderately anxious or depressed	50	148	88	53	5.1	22.1
Male	45	Not capable of working	Married	Primary	Non smoker	No	No exercise	Low	Not any	24.6	150	90	96	96	yes	I have moderate problems in walking about	I have no problems washing or dressing myself	I have slight problems doing my usual activities	I have severe pain or discomfort	I am slightly anxious or depressed	60		I have severe problems in walking about	I have no problems washing or dressing myself	I have no problems doing my usual activities	I have severe pain or discomfort	I am moderately anxious or depressed	65	160	78	60	5.2	24.2		I have severe problems in walking about	I have moderate problems washing or dressing myself	I have severe problems doing my usual activities	I have moderate pain or discomfort	I am moderately anxious or depressed	68	150	90	60	5.2	24.2
Male	53	Not capable of working	Married	Secondary	Smoker	No	No exercise	Normal	Not any	24.9	170	100	144	54	no	I have severe problems in walking about	I have no problems washing or dressing myself	I have severe problems doing my usual activities	I have severe pain or discomfort	I am not anxious or depressed	30		I have severe problems in walking about	I have no problems washing or dressing myself	I have no problems doing my usual activities	I have severe pain or discomfort	I am moderately anxious or depressed	30	170	105	71	5.7	24.5		I have severe problems in walking about	I have severe problems washing or dressing myself	I have severe problems doing my usual activities	I have moderate pain or discomfort	I am moderately anxious or depressed	30	167	100	72	5.7	24.9
Female	45	Not capable of working	Married	Primary	Non smoker	No	No exercise	Low	Not any	30.4	160	100	180	108	yes	I have severe problems in walking about	I have slight problems washing or dressing myself	I have severe problems doing my usual activities	I have extreme pain or discomfort	I am not anxious or depressed	25		I have no problems in walking about	I have no problems washing or dressing myself	I am unable to do my usual activities	I have severe pain or discomfort	I am moderately anxious or depressed	30	150	91	81	5.4	30.7		I have severe problems in walking about	I have severe problems washing or dressing myself	I have severe problems doing my usual activities	I have moderate pain or discomfort	I am extremely anxious or depressed	30	155	95	81	5.4	30.7
Female	37	not working	Married	Secondary	Non smoker	No	Daily	Low	Diabetes mellitus	18.8	150	90	126	2	yes	I have moderate problems in walking about	I have no problems washing or dressing myself	I have severe problems doing my usual activities	I have no pain or discomfort	I am moderately anxious or depressed	50		I am unable to walk about	I have no problems washing or dressing myself	I am unable to do my usual activities	I have severe pain or discomfort	I am moderately anxious or depressed	55	160	90	50	5.4	18.8		I have moderate problems in walking about	I have severe problems washing or dressing myself	I have severe problems doing my usual activities	I have moderate pain or discomfort	I am extremely anxious or depressed	53	147	87	50	5.4	18.8
Female	47	not working	Married	Middle	Non smoker	No	No exercise	Normal	Not any	32.3	145	85	90	18	no	I have no problems in walking about	I have slight problems washing or dressing myself	I have moderate problems doing my usual activities	I have severe pain or discomfort	I am not anxious or depressed	65		I have severe problems in walking about	I have no problems washing or dressing myself	I have severe problems doing my usual activities	I have slight pain or discomfort	I am extremely anxious or depressed	60	147	85	81	5.2	32.7		I am unable to walk about	I have severe problems washing or dressing myself	I have severe problems doing my usual activities	I have moderate pain or discomfort	I am extremely anxious or depressed	68	143	84	82	5.2	33.1
Female	29	not working	Married	Middle	Non smoker	No	No exercise	Normal	Not any	29.8	190	85	36	54	yes	I have no problems in walking about	I have no problems washing or dressing myself	I have no problems doing my usual activities	I have severe pain or discomfort	I am slightly anxious or depressed	85		I have severe problems in walking about	I have no problems washing or dressing myself	I have no problems doing my usual activities	I have slight pain or discomfort	I am extremely anxious or depressed	85	200	85	56	4.5	29.8		I have slight problems in walking about	I have no problems washing or dressing myself	I have severe problems doing my usual activities	I have moderate pain or discomfort	I am extremely anxious or depressed	87	186	84	55	4.5	30.3
Female	44	not working	Married	Middle	Non smoker	No	Some times	Normal	Not any	28.8	170	85	120	72	no	I have slight problems in walking about	I have no problems washing or dressing myself	I have moderate problems doing my usual activities	I have slight pain or discomfort	I am not anxious or depressed	80		I have moderate problems in walking about	I have no problems washing or dressing myself	I have moderate problems doing my usual activities	I have moderate pain or discomfort	I am extremely anxious or depressed	80	173	80	82	5.6	29.2		I have slight problems in walking about	I have no problems washing or dressing myself	I have severe problems doing my usual activities	I have moderate pain or discomfort	I am extremely anxious or depressed	80	167	84	82	5.6	29.2
male	49	Not capable of working		Middle	Non smoker	No	No exercise	Normal	Diabetes mellitus	20.2	140	79	66	36	yes	I have severe problems in walking about	I am unable to wash or dress myself	I am unable to do my usual activities	I have severe pain or discomfort	I am not anxious or depressed	40		I have slight problems in walking about	I have no problems washing or dressing myself	I have no problems doing my usual activities	I have moderate pain or discomfort	I am extremely anxious or depressed	45	154	80	62	5.9	20.2		I have slight problems in walking about	I have no problems washing or dressing myself	I have severe problems doing my usual activities	I have moderate pain or discomfort	I am extremely anxious or depressed	43	138	76	62	5.9	20.2
Male	59	Not capable of working	Married	Secondary	Ex-smoker	No	No exercise	Normal	Diabetes mellitus	20.6	190	80	132	72	yes	I have severe problems in walking about	I have slight problems washing or dressing myself	I am unable to do my usual activities	I have moderate pain or discomfort	I am not anxious or depressed	45		I have slight problems in walking about	I have no problems washing or dressing myself	I have no problems doing my usual activities	I have moderate pain or discomfort	I am extremely anxious or depressed	50	205	110	57	5.6	19.2		I have slight problems in walking about	I have no problems washing or dressing myself	I have severe problems doing my usual activities	I have moderate pain or discomfort	I am extremely anxious or depressed	50	186	80	56	5.6
Female	66	Not capable of working	Married	Not educated	Non smoker	No	No exercise	Normal	Diabetes mellitus, Hepatitis	22	150	85	18	48	no	I have slight problems in walking about	I have severe problems washing or dressing myself	I am unable to do my usual activities	I have severe pain or discomfort	I am extremely anxious or depressed	40		I have severe problems in walking about	I have no problems washing or dressing myself	I have no problems doing my usual activities	I have moderate pain or discomfort	I am extremely anxious or depressed	40	165	90	60	5.5	22		I have moderate problems in walking about	I have no problems washing or dressing myself	I have severe problems doing my usual activities	I have moderate pain or discomfort	I am extremely anxious or depressed	45	147	85	59	5.5	21.6
Female	41	Not capable of working	Married	Middle	Non smoker	No	Daily	Low	Hepatitis, Epilepsy	16.4	170	100	60	60	no	I have severe problems in walking about	I have no problems washing or dressing myself	I have severe problems doing my usual activities	I have severe pain or discomfort	I am moderately anxious or depressed	33		I have moderate problems in walking about	I have slight problems washing or dressing myself	I have moderate problems doing my usual activities	I have severe pain or discomfort	I am extremely anxious or depressed	35	170	96	41	5.3	16		I have moderate problems in walking about	I have no problems washing or dressing myself	I have severe problems doing my usual activities	I have moderate pain or discomfort	I am extremely anxious or depressed	35	168	96	41	5.3
Female	37	not working	Married	Not educated	Non smoker	No	No exercise	Normal	Not any	23.3	160	80	84	72	no	I have slight problems in walking about	I have no problems washing or dressing myself	I have moderate problems doing my usual activities	I have severe pain or discomfort	I am slightly anxious or depressed	60		I have severe problems in walking about	I have severe problems washing or dressing myself	I have moderate problems doing my usual activities	I have severe pain or discomfort	I am extremely anxious or depressed	60	160	80	55	5.1	23.3		I have moderate problems in walking about	I have no problems washing or dressing myself	I have severe problems doing my usual activities	I have moderate pain or discomfort	I am extremely anxious or depressed	64	157	81	55	5.1	22.9
female	41	Not capable of working	Married	Not educated	Non smoker	No	No exercise	Low	Not any	21.1	170	98	60	336	yes	I have severe problems in walking about	I have moderate problems washing or dressing myself	I have severe problems doing my usual activities	I have severe pain or discomfort	I am moderately anxious or depressed	45		I have severe problems in walking about	I have moderate problems washing or dressing myself	I have severe problems doing my usual activities	I have severe pain or discomfort	I am extremely anxious or depressed	50	160	90	50	5	21.5		I have moderate problems in walking about	I have no problems washing or dressing myself	I have severe problems doing my usual activities	I have moderate pain or discomfort	I am extremely anxious or depressed	48	164	95	50	5	21.5
Male	42	Not capable of working	Married	Primary	Non smoker	No	Some times	Low	Not any	22.8	150	90	84	24	no	I have slight problems in walking about	I have no problems washing or dressing myself	I have severe problems doing my usual activities	I have severe pain or discomfort	I am slightly anxious or depressed	40		I have severe problems in walking about	I have moderate problems washing or dressing myself	I have severe problems doing my usual activities	I have severe pain or discomfort	I am extremely anxious or depressed	45	140	85	68	5.9	22.1		I have severe problems in walking about	I have no problems washing or dressing myself	I have severe problems doing my usual activities	I have severe pain or discomfort	I am extremely anxious or depressed	45	146	89	69	5.9
Male	53	Doing a job	Married	Secondary	Non smoker	No	No exercise	Low	Diabetes mellitus	25.4	170	90	120	60	no	I have slight problems in walking about	I have no problems washing or dressing myself	I have slight problems doing my usual activities	I have moderate pain or discomfort	I am slightly anxious or depressed	60		I have severe problems in walking about	I have severe problems washing or dressing myself	I have severe problems doing my usual activities	I have severe pain or discomfort	I am extremely anxious or depressed	65	169	86	65	5.1	25.4		I have severe problems in walking about	I have no problems washing or dressing myself	I have severe problems doing my usual activities	I have severe pain or discomfort	I am extremely anxious or depressed	64	165	84	66	5.1	27.5
Male	47	Not capable of working	Married	Middle	Ex-smoker	No	Some times	Low	Diabetes mellitus	27.9	163	91	168	48	yes	I have moderate problems in walking about	I have slight problems washing or dressing myself	I have severe problems doing my usual activities	I have severe pain or discomfort	I am slightly anxious or depressed	35		I have moderate problems in walking about	I have no problems washing or dressing myself	I have severe problems doing my usual activities	I have severe pain or discomfort	I am extremely anxious or depressed	40	165	88	68	5.1	28.3		I have no problems in walking about	I have no problems washing or dressing myself	I have severe problems doing my usual activities	I have severe pain or discomfort	I am extremely anxious or depressed	40	160	90	68	5.1	28.3
Male	45	Doing a job	Married	Graduate	Non smoker	No	No exercise	Normal	Hepatitis	22.1	160	85	96	12	yes	I have severe problems in walking about	I have severe problems washing or dressing myself	I am unable to do my usual activities	I have severe pain or discomfort	I am moderately anxious or depressed	50		I have slight problems in walking about	I have no problems washing or dressing myself	I have severe problems doing my usual activities	I have severe pain or discomfort	I am extremely anxious or depressed	55	150	85	75	6.1	21.8		I have slight problems in walking about	I have no problems washing or dressing myself	I have severe problems doing my usual activities	I have severe pain or discomfort	I am extremely anxious or depressed	54	158	82	75	6.1	21.8
Female	50	not working	Married	Primary	Non smoker	No	No exercise	Low	Diabetes mellitus, Hepatitis	18.1	200	85	12	4	yes	I have moderate problems in walking about	I have no problems washing or dressing myself	I have severe problems doing my usual activities	I have severe pain or discomfort	I am slightly anxious or depressed	60		I have severe problems in walking about	I have no problems washing or dressing myself	I have no problems doing my usual activities	I have severe pain or discomfort	I am extremely anxious or depressed	60	190	80	64	6.2	18.1		I have slight problems in walking about	I have no problems washing or dressing myself	I have severe problems doing my usual activities	I have severe pain or discomfort	I am extremely anxious or depressed	64	194	84	65	6.2
Male	38	Doing a job	Married	Higher secondary	Non smoker	No	No exercise	Low	Diabetes mellitus, Hepatitis	23.4	154	96	12	12	no	I have severe problems in walking about	I have severe problems washing or dressing myself	I am unable to do my usual activities	I have severe pain or discomfort	I am slightly anxious or depressed	45		I have severe problems in walking about	I have no problems washing or dressing myself	I have no problems doing my usual activities	I have severe pain or discomfort	I am extremely anxious or depressed	40	160	83	59	5.2	23.8		I have slight problems in walking about	I have no problems washing or dressing myself	I have severe problems doing my usual activities	I have severe pain or discomfort	I am extremely anxious or depressed	48	150	93	57	5.2	23
Male	51	not working	Married	Middle	Non smoker	No	No exercise	Normal	Hepatitis	29.9	148	88	18	18	no	I have severe problems in walking about	I have no problems washing or dressing myself	I have slight problems doing my usual activities	I have no pain or discomfort	I am moderately anxious or depressed	70		I have moderate problems in walking about	I have severe problems washing or dressing myself	I am unable to do my usual activities	I have severe pain or discomfort	I am extremely anxious or depressed	65	160	90	99	6	29.6		I have slight problems in walking about	I have no problems washing or dressing myself	I have severe problems doing my usual activities	I have severe pain or discomfort	I am extremely anxious or depressed	72	146	87	99	6	29.6
Male	37	Private business	Married	Secondary	Non smoker	No	Daily	Normal	Not any	20.9	150	75	36	36	no	I have slight problems in walking about	I have no problems washing or dressing myself	I have no problems doing my usual activities	I have slight pain or discomfort	I am moderately anxious or depressed	70		I have slight problems in walking about	I have severe problems washing or dressing myself	I am unable to do my usual activities	I have severe pain or discomfort	I am extremely anxious or depressed	75	165	81	79	6.5	20.7		I have slight problems in walking about	I have no problems washing or dressing myself	I have severe problems doing my usual activities	I have severe pain or discomfort	I am extremely anxious or depressed	72	147	74	78	6.5
Female	50	not working	Married	Primary	Non smoker	No	No exercise	Normal	Diabetes mellitus	21.5	154	74	66	6	no	I have moderate problems in walking about	I have no problems washing or dressing myself	I have moderate problems doing my usual activities	I have moderate pain or discomfort	I am slightly anxious or depressed	50		I am unable to walk about	I have no problems washing or dressing myself	I am unable to do my usual activities	I have severe pain or discomfort	I am extremely anxious or depressed	55	160	84	50	5	21.5		I have slight problems in walking about	I have no problems washing or dressing myself	I have severe problems doing my usual activities	I have severe pain or discomfort	I am extremely anxious or depressed	57	150	74	50	5	21.5
Male	62	Doing a job	Married	Secondary	Ex-smoker	No	No exercise	Low	Diabetes mellitus	24.6	149	70	112.5	3.5	yes	I have slight problems in walking about	I have no problems washing or dressing myself	I have severe problems doing my usual activities	I have moderate pain or discomfort	I am not anxious or depressed	60		I have severe problems in walking about	I have severe problems washing or dressing myself	I have slight problems doing my usual activities	I have extreme pain or discomfort	I am extremely anxious or depressed	57	140	70	65	5.4	24.6		I have moderate problems in walking about	I have no problems washing or dressing myself	I have severe problems doing my usual activities	I have severe pain or discomfort	I am extremely anxious or depressed	63	146	70	66	5.4	25
Female	27	not working	Married	Graduate	Non smoker	No	No exercise	Low	Not any	18.1	172	107	36	12	yes	I have slight problems in walking about	I have no problems washing or dressing myself	I have slight problems doing my usual activities	I have slight pain or discomfort	I am moderately anxious or depressed	75		I have moderate problems in walking about	I have moderate problems washing or dressing myself	I have severe problems doing my usual activities	I have extreme pain or discomfort	I am extremely anxious or depressed	75	150	85	44	5.2	17.7		I have moderate problems in walking about	I have no problems washing or dressing myself	I have severe problems doing my usual activities	I have severe pain or discomfort	I am extremely anxious or depressed	75	170	104	44	5.2	17.7
Male	28	not working	Single	Secondary	Non smoker	No	No exercise	Low	Not any	19	148	103	24	24	yes	I have slight problems in walking about	I have no problems washing or dressing myself	I have slight problems doing my usual activities	I have severe pain or discomfort	I am extremely anxious or depressed	60		I have severe problems in walking about	I have severe problems washing or dressing myself	I have severe problems doing my usual activities	I have extreme pain or discomfort	I am extremely anxious or depressed	65	155	95	47.5	5.2	19.2		I have severe problems in walking about	I have no problems washing or dressing myself	I have severe problems doing my usual activities	I have severe pain or discomfort	I am extremely anxious or depressed	64	145	100	48	5.2	19.4
Female	45	not working	Married	Secondary	Non smoker	No	No exercise	Normal	Diabetes mellitus, Hepatitis	28.2	137	50	336	48	yes	I have slight problems in walking about	I have no problems washing or dressing myself	I have no problems doing my usual activities	I have moderate pain or discomfort	I am not anxious or depressed	85		I have moderate problems in walking about	I have slight problems washing or dressing myself	I have severe problems doing my usual activities	I have no pain or discomfort	I am extremely anxious or depressed	80	144	70	69	5.2	27.8		I have no problems in walking about	I have no problems washing or dressing myself	I have severe problems doing my usual activities	I have severe pain or discomfort	I am extremely anxious or depressed	86	134	60	68	5.2
Male	69	Not capable of working	Married	Secondary	Non smoker	No	No exercise	Low	Diabetes mellitus	20.8	168	78	2.5	1	no	I have severe problems in walking about	I have no problems washing or dressing myself	I have slight problems doing my usual activities	I have moderate pain or discomfort	I am moderately anxious or depressed	50		I have slight problems in walking about	I have slight problems washing or dressing myself	I have severe problems doing my usual activities	I have no pain or discomfort	I am extremely anxious or depressed	50	148	73	50	5.1	20.8		I have no problems in walking about	I have no problems washing or dressing myself	I have no problems doing my usual activities	I have severe pain or discomfort	I am severely anxious or depressed	50	164	78	50	5.1	20.8
Female	46	Not capable of working	Married	Not educated	Smoker	No	No exercise	Low	Not any	19.6	140	75	66	66	no	I am unable to walk about	I am unable to wash or dress myself	I am unable to do my usual activities	I have severe pain or discomfort	I am slightly anxious or depressed	30		I have severe problems in walking about	I have no problems washing or dressing myself	I have no problems doing my usual activities	I have no pain or discomfort	I am extremely anxious or depressed	40	147	78	56	5.6	19.9		I have no problems in walking about	I have no problems washing or dressing myself	I have no problems doing my usual activities	I have severe pain or discomfort	I am severely anxious or depressed	35	137	75	56	5.6
Male	65	Retired	Married	Higher secondary	Ex-smoker	No	No exercise	Low	Not any	22.1	170	71	30	48	no	I have moderate problems in walking about	I have no problems washing or dressing myself	I have moderate problems doing my usual activities	I have slight pain or discomfort	I am not anxious or depressed	70		I have no problems in walking about	I have no problems washing or dressing myself	I am unable to do my usual activities	I have no pain or discomfort	I am extremely anxious or depressed	75	145	65	62	5.6	22.1		I have no problems in walking about	I have no problems washing or dressing myself	I have no problems doing my usual activities	I have severe pain or discomfort	I am severely anxious or depressed	75	167	74	63	5.6	22.4
Female	48	not working	Married	Not educated	Non smoker	No	Some times	Normal	Not any	20.3	170	85	150	48	no	I have no problems in walking about	I have no problems washing or dressing myself	I have no problems doing my usual activities	I have slight pain or discomfort	I am slightly anxious or depressed	85		I have severe problems in walking about	I have severe problems washing or dressing myself	I am unable to do my usual activities	I have no pain or discomfort	I am extremely anxious or depressed	80	190	95	56.5	5.6	20.1		I have no problems in walking about	I have no problems washing or dressing myself	I have no problems doing my usual activities	I have severe pain or discomfort	I am severely anxious or depressed	80	180	82	57	5.6	20.3
Male	37	Not capable of working	Married	Not educated	Non smoker	No	No exercise	Low	Hepatitis	22	167	98	196	12	no	I have moderate problems in walking about	I have slight problems washing or dressing myself	I have severe problems doing my usual activities	I have no pain or discomfort	I am extremely anxious or depressed	50		I have slight problems in walking about	I have no problems washing or dressing myself	I have slight problems doing my usual activities	I have slight pain or discomfort	I am severely anxious or depressed	50	143	80	59	5.5	21.6		I have moderate problems in walking about	I have no problems washing or dressing myself	I have no problems doing my usual activities	I have severe pain or discomfort	I am severely anxious or depressed	50	160	95	58	5.5	21.3
Male	50	not working	Married	Graduate	Non smoker	No	No exercise	Normal	Hepatitis	29.3	151	78	120	60	yes	I have slight problems in walking about	I have no problems washing or dressing myself	I have no problems doing my usual activities	I have no pain or discomfort	I am not anxious or depressed	50		I have moderate problems in walking about	I have slight problems washing or dressing myself	I have severe problems doing my usual activities	I have severe pain or discomfort	I am severely anxious or depressed	50	173	88	79	5.5	29		I have severe problems in walking about	I have no problems washing or dressing myself	I have no problems doing my usual activities	I have severe pain or discomfort	I am severely anxious or depressed	45	165	85	78	5.5
Male	43	Not capable of working	Married	Secondary	Non smoker	No	No exercise	Low	Hepatitis	21.1	157	79	96	96	yes	I have moderate problems in walking about	I have no problems washing or dressing myself	I have no problems doing my usual activities	I have severe pain or discomfort	I am extremely anxious or depressed	40		I have slight problems in walking about	I have no problems washing or dressing myself	I have severe problems doing my usual activities	I have severe pain or discomfort	I am severely anxious or depressed	50	160	76	55	5.3	21.5		I am unable to walk about	I am unable to wash or dress myself	I have moderate problems doing my usual activities	I have slight pain or discomfort	I am not anxious or depressed	45	150	73	56	5.3	21.9
Male	42	Doing a job	Married	Middle	Non smoker	No	No exercise	Low	Diabetes mellitus	26	150	80	48	12	no	I have severe problems in walking about	I have no problems washing or dressing myself	I have moderate problems doing my usual activities	I have extreme pain or discomfort	I am slightly anxious or depressed	25		I have severe problems in walking about	I have no problems washing or dressing myself	I am unable to do my usual activities	I have severe pain or discomfort	I am severely anxious or depressed	20	185	94	72	5.6	25.6		I have moderate problems in walking about	I have severe problems washing or dressing myself	I have severe problems doing my usual activities	I have moderate pain or discomfort	I am not anxious or depressed	30	170	85	70	5.6	24.9
Male	63	Not capable of working	Married	Secondary	Non smoker	No	No exercise	Low	Diabetes mellitus	27	176	81	60	18	yes	I have slight problems in walking about	I have slight problems washing or dressing myself	I have severe problems doing my usual activities	I have no pain or discomfort	I am moderately anxious or depressed	40		I have moderate problems in walking about	I have severe problems washing or dressing myself	I have severe problems doing my usual activities	I have no pain or discomfort	I am severely anxious or depressed	50	150	80	75	5.6	26.7		I have no problems in walking about	I have severe problems washing or dressing myself	I have severe problems doing my usual activities	I have moderate pain or discomfort	I am not anxious or depressed	40	160	89	74	5.6	26.3
Male	60	Private business	Married	Graduate	Smoker	No		Normal	Not any	25.5	162	70	24	96	no	I have no problems in walking about	I have no problems washing or dressing myself	I have no problems doing my usual activities	I have severe pain or discomfort	I am moderately anxious or depressed	60		I have severe problems in walking about	I have severe problems washing or dressing myself	I am unable to do my usual activities	I have no pain or discomfort	I am severely anxious or depressed	55	200	100	77	5.8	25.8		I have slight problems in walking about	I have no problems washing or dressing myself	I have severe problems doing my usual activities	I have moderate pain or discomfort	I am not anxious or depressed	50	182	78	77	5.8
Male	46	Private business	Married	Higher secondary	Ex-smoker	No	No exercise	Normal	Not any	27.9	155	80	12	7	yes	I have no problems in walking about	I have no problems washing or dressing myself	I have no problems doing my usual activities	I have moderate pain or discomfort	I am slightly anxious or depressed	80		I have moderate problems in walking about	I have no problems washing or dressing myself	I have slight problems doing my usual activities	I have slight pain or discomfort	I am not anxious or depressed	70	160	81	75	5.5	27.5		I have no problems in walking about	I have no problems washing or dressing myself	I have no problems doing my usual activities	I have severe pain or discomfort	I am not anxious or depressed	75	150	72	74	5.5	27.1
Male	45	Not capable of working	Married	Higher secondary	Smoker	No	No exercise	Normal	Hepatitis	25.6	144	75	24	24	yes	I have no problems in walking about	I have no problems washing or dressing myself	I have moderate problems doing my usual activities	I have moderate pain or discomfort	I am not anxious or depressed	70		I have moderate problems in walking about	I have no problems washing or dressing myself	I have slight problems doing my usual activities	I have slight pain or discomfort	I am not anxious or depressed	70	145	70	74	5.7	25.6		I have no problems in walking about	I have no problems washing or dressing myself	I have no problems doing my usual activities	I have severe pain or discomfort	I am not anxious or depressed	70	156	79	73	5.7	25.2
Female	55	not working	Married	Secondary	Non smoker	No	No exercise	Normal	Hepatitis	23	145	85	78	78	no	I have severe problems in walking about	I have no problems washing or dressing myself	I have moderate problems doing my usual activities	I have severe pain or discomfort	I am moderately anxious or depressed	50		I have moderate problems in walking about	I have no problems washing or dressing myself	I have slight problems doing my usual activities	I have slight pain or discomfort	I am not anxious or depressed	50	156	75	56	5.2	22.6		I have moderate problems in walking about	I have no problems washing or dressing myself	I have no problems doing my usual activities	I have severe pain or discomfort	I am not anxious or depressed	50	170	88	56	5.2	22.6
Female	62	Not capable of working	Married	Not educated	Non smoker	No	No exercise	Low	Diabetes mellitus, Hepatitis	20.8	162	70	240	11	yes	I have severe problems in walking about	I have severe problems washing or dressing myself	I am unable to do my usual activities	I have extreme pain or discomfort	I am extremely anxious or depressed	30		I have severe problems in walking about	I have no problems washing or dressing myself	I have slight problems doing my usual activities	I have slight pain or discomfort	I am not anxious or depressed	40	190	88	55	5.4	20.8		I have severe problems in walking about	I have no problems washing or dressing myself	I have no problems doing my usual activities	I have severe pain or discomfort	I am not anxious or depressed	35	180	76	55	5.4	20.8
Male	52	Not capable of working	Married	Graduate	Non smoker	No	No exercise		Not any	28.2	150	90	96	4	yes	I have moderate problems in walking about	I have severe problems washing or dressing myself	I have severe problems doing my usual activities	I have severe pain or discomfort	I am severely anxious or depressed	25		I have no problems in walking about	I have no problems washing or dressing myself	I have slight problems doing my usual activities	I have slight pain or discomfort	I am not anxious or depressed	30	160	93	70	5.2	28.2		I have slight problems in walking about	I have no problems washing or dressing myself	I have no problems doing my usual activities	I have severe pain or discomfort	I am not anxious or depressed	30	140	84	69	5.2	27.8
Female	55	not working	Married	Primary	Non smoker	No	No exercise	Low	Not any	29.7	140	75	54	2	yes	I have no problems in walking about	I have slight problems washing or dressing myself	I have severe problems doing my usual activities	I have no pain or discomfort	I am not anxious or depressed	60		I have severe problems in walking about	I have severe problems washing or dressing myself	I have moderate problems doing my usual activities	I have slight pain or discomfort	I am not anxious or depressed	60	150	80	59	4.8	29.2		I have severe problems in walking about	I am unable to wash or dress myself	I have no problems doing my usual activities	I have severe pain or discomfort	I am not anxious or depressed	55	140	75	58	4.8	28.7
Male	50	Not capable of working	Married	Primary	Non smoker	No	No exercise	Low	Not any	20.3	190	93	24	3	no	I am unable to walk about	I am unable to wash or dress myself	I am unable to do my usual activities	I have severe pain or discomfort	I am not anxious or depressed	20		I have slight problems in walking about	I have no problems washing or dressing myself	I have moderate problems doing my usual activities	I have slight pain or discomfort	I am not anxious or depressed	25	159	70	67	6	20		I am unable to walk about	I am unable to wash or dress myself	I have no problems doing my usual activities	I have severe pain or discomfort	I am not anxious or depressed	17	170	85	65	6	19.4
Female	46	not working	Married	Middle	Non smoker	No	No exercise	Low	Not any	21.3	150	85	66	60	no	I have no problems in walking about	I have no problems washing or dressing myself	I have slight problems doing my usual activities	I have no pain or discomfort	I am not anxious or depressed	80		I have moderate problems in walking about	I have no problems washing or dressing myself	I have moderate problems doing my usual activities	I have slight pain or discomfort	I am not anxious or depressed	75	175	85	61	5.6	21.7		I have slight problems in walking about	I have slight problems washing or dressing myself	I have no problems doing my usual activities	I have severe pain or discomfort	I am not anxious or depressed	70	155	88	62	5.6	22.1
Female	51	not working	Married	Secondary	Non smoker	No	No exercise	Normal	Diabetes mellitus, Hepatitis	22.8	186	72	240	12	yes	I have severe problems in walking about	I have severe problems washing or dressing myself	I have severe problems doing my usual activities	I have extreme pain or discomfort	I am extremely anxious or depressed	45		I have severe problems in walking about	I have no problems washing or dressing myself	I have severe problems doing my usual activities	I have slight pain or discomfort	I am not anxious or depressed	50	148	70	65	5.6	23.1		I have moderate problems in walking about	I have slight problems washing or dressing myself	I have no problems doing my usual activities	I have severe pain or discomfort	I am not anxious or depressed	50	165	67	67	5.6	23.8
Male	31	not working	Single	Not educated	Non smoker	No	Some times	Low	Hepatitis	21.2	170	90	84	2	yes	I have slight problems in walking about	I have no problems washing or dressing myself	I have severe problems doing my usual activities	I have moderate pain or discomfort	I am not anxious or depressed	70		I have slight problems in walking about	I have no problems washing or dressing myself	I have severe problems doing my usual activities	I have slight pain or discomfort	I am not anxious or depressed	65	180	83	66	5.9	21.5		I have moderate problems in walking about	I have slight problems washing or dressing myself	I have no problems doing my usual activities	I have severe pain or discomfort	I am not anxious or depressed	70	190	87	67	5.9	21.8
Female	50	not working	Married	Secondary	Non smoker	No	Some times	Low	Not any	23.8	170	110	96	2	no	I have slight problems in walking about	I have no problems washing or dressing myself	I have slight problems doing my usual activities	I have slight pain or discomfort	I am slightly anxious or depressed	50		I have slight problems in walking about	I have no problems washing or dressing myself	I have no problems doing my usual activities	I have slight pain or discomfort	I am not anxious or depressed	55	160	95	60	5.2	24.2		I have moderate problems in walking about	I have slight problems washing or dressing myself	I have no problems doing my usual activities	I have severe pain or discomfort	I am not anxious or depressed	55	150	90	61	5.2
Female	50	not working	Married	Middle	Non smoker	No	No exercise	Low	Hepatitis	23.8	140	90	24	24	no	I have no problems in walking about	I have no problems washing or dressing myself	I have no problems doing my usual activities	I have slight pain or discomfort	I am not anxious or depressed	90		I have no problems in walking about	I have no problems washing or dressing myself	I have no problems doing my usual activities	I have slight pain or discomfort	I am not anxious or depressed	90	140	80	59	5.3	23		I have severe problems in walking about	I have slight problems washing or dressing myself	I have no problems doing my usual activities	I have severe pain or discomfort	I am not anxious or depressed	90	149	90	58	5.3	22.7
Male	32	not working	Single	Middle	Non smoker	No	Some times	Low	Not any	15.7	140	80	120	120	yes	I have moderate problems in walking about	I have no problems washing or dressing myself	I have severe problems doing my usual activities	I have severe pain or discomfort	I am not anxious or depressed	25		I have no problems in walking about	I have no problems washing or dressing myself	I have no problems doing my usual activities	I have slight pain or discomfort	I am not anxious or depressed	30	150	85	44	5.6	15.7		I have no problems in walking about	I have slight problems washing or dressing myself	I have no problems doing my usual activities	I have severe pain or discomfort	I am not anxious or depressed	20	143	82	44	5.6	15.7
Female	45	not working	Married	Middle	Non smoker	No	No exercise	Low	Diabetes mellitus	29.9	150	80	384	108	yes	I have severe problems in walking about	I have moderate problems washing or dressing myself	I have severe problems doing my usual activities	I have extreme pain or discomfort	I am not anxious or depressed	35		I have no problems in walking about	I have no problems washing or dressing myself	I have no problems doing my usual activities	I have slight pain or discomfort	I am not anxious or depressed	30	140	83	83	5.6	29.5		I have moderate problems in walking about	I have moderate problems washing or dressing myself	I have no problems doing my usual activities	I have severe pain or discomfort	I am not anxious or depressed	30	145	78	83	5.6	29.5
Female	41	not working	Married	Secondary	Non smoker	No	Daily	Normal	Cardio vascular disease, Hepatitis	22.7	170	100	36	36	no	I have severe problems in walking about	I have no problems washing or dressing myself	I am unable to do my usual activities	I have severe pain or discomfort	I am not anxious or depressed	60		I have no problems in walking about	I have no problems washing or dressing myself	I have no problems doing my usual activities	I have slight pain or discomfort	I am not anxious or depressed	65	180	90	60	5.4	22.7		I have moderate problems in walking about	I have severe problems washing or dressing myself	I have no problems doing my usual activities	I have severe pain or discomfort	I am not anxious or depressed	60	160	95	60	5.4
Female	30	not working	Married	Primary	Non smoker	No	No exercise	Low	Hepatitis	26.7	180	90	188	24	yes	I have moderate problems in walking about	I have no problems washing or dressing myself	I have moderate problems doing my usual activities	I have slight pain or discomfort	I am not anxious or depressed	55		I have no problems in walking about	I have no problems washing or dressing myself	I am unable to do my usual activities	I have slight pain or discomfort	I am not anxious or depressed	55	210	105	63	5	27.1		I have moderate problems in walking about	I have severe problems washing or dressing myself	I have no problems doing my usual activities	I have severe pain or discomfort	I am not anxious or depressed	50	190	94	64	5	27.6
Male	28	not working	Single	Higher secondary	Non smoker	No	Daily	Low	Not any	26.1	160	100	39	24	yes	I have no problems in walking about	I have no problems washing or dressing myself	I have no problems doing my usual activities	I have moderate pain or discomfort	I am moderately anxious or depressed	70		I have no problems in walking about	I have no problems washing or dressing myself	I am unable to do my usual activities	I have slight pain or discomfort	I am not anxious or depressed	70	168	89	77	5.8	25.8		I have severe problems in walking about	I have severe problems washing or dressing myself	I have no problems doing my usual activities	I have severe pain or discomfort	I am not anxious or depressed	70	150	90	76	5.8	25.5
Male	36	Not capable of working	Married	Middle	Ex-smoker	No	No exercise	Normal	Hepatitis	19.4	160	85	36	24	no	I have moderate problems in walking about	I have no problems washing or dressing myself	I am unable to do my usual activities	I have moderate pain or discomfort	I am moderately anxious or depressed	55		I have moderate problems in walking about	I have no problems washing or dressing myself	I am unable to do my usual activities	I have slight pain or discomfort	I am not anxious or depressed	60	152	75	58	5.8	19.4		I have severe problems in walking about	I have severe problems washing or dressing myself	I have no problems doing my usual activities	I have severe pain or discomfort	I am not anxious or depressed	60	165	85	57	5.8	19.1
Male	65	Not capable of working	Married	Primary	Ex-smoker	No	No exercise	Low	Diabetes mellitus, Hepatitis	24.2	180	75	108	108	no	I have severe problems in walking about	I have severe problems washing or dressing myself	I am unable to do my usual activities	I have severe pain or discomfort	I am not anxious or depressed	50		I have severe problems in walking about	I have no problems washing or dressing myself	I am unable to do my usual activities	I have slight pain or discomfort	I am not anxious or depressed	50	190	100	81	6	24.2		I have severe problems in walking about	I have severe problems washing or dressing myself	I have no problems doing my usual activities	I have severe pain or discomfort	I am not anxious or depressed	50	170	80	80	6	23.9
Female	27	not working	Single	Higher secondary	Non smoker	No	Some times	High	Cardio vascular disease, Stomach issue	19.4	160	85	48	24	yes	I have slight problems in walking about	I have no problems washing or dressing myself	I have no problems doing my usual activities	I have moderate pain or discomfort	I am extremely anxious or depressed	50		I have moderate problems in walking about	I have slight problems washing or dressing myself	I have moderate problems doing my usual activities	I have moderate pain or discomfort	I am not anxious or depressed	50	150	80	57	5.8	19.1		I am unable to walk about	I have severe problems washing or dressing myself	I have no problems doing my usual activities	I have severe pain or discomfort	I am not anxious or depressed	50	168	82	57	5.8
Male	48	Not capable of working	Married	Middle	Ex-smoker	No	Some times	Low	Not any	24.2	196	90	30	24	no	I have no problems in walking about	I have no problems washing or dressing myself	I have no problems doing my usual activities	I have moderate pain or discomfort	I am slightly anxious or depressed	70		I have moderate problems in walking about	I have moderate problems washing or dressing myself	I have moderate problems doing my usual activities	I have moderate pain or discomfort	I am not anxious or depressed	70	200	110	67	5.6	23.8		I have slight problems in walking about	I have no problems washing or dressing myself	I have no problems doing my usual activities	I have severe pain or discomfort	I am not anxious or depressed	75	180	88	66	5.6	23.5
Male	63	Not capable of working	Married	Middle	Non smoker	No	No exercise	Low	Diabetes mellitus, Hepatitis	23.5	140	70	12	4	no	I have severe problems in walking about	I have moderate problems washing or dressing myself	I have severe problems doing my usual activities	I have moderate pain or discomfort	I am not anxious or depressed	80		I have moderate problems in walking about	I have no problems washing or dressing myself	I have moderate problems doing my usual activities	I have moderate pain or discomfort	I am not anxious or depressed	80	165	90	67	5.6	23.8		I have moderate problems in walking about	I have no problems washing or dressing myself	I have no problems doing my usual activities	I have severe pain or discomfort	I am not anxious or depressed	85	160	80	67	5.6	23.8
Male	47	Private business	Married	Higher secondary	Non smoker	No	No exercise	Normal	Diabetes mellitus, Hepatitis	25.4	140	70	60	12	yes	I have severe problems in walking about	I have no problems washing or dressing myself	I have severe problems doing my usual activities	I have no pain or discomfort	I am extremely anxious or depressed	70		I have moderate problems in walking about	I have no problems washing or dressing myself	I have moderate problems doing my usual activities	I have moderate pain or discomfort	I am not anxious or depressed	75	170	85	60	5	25.8		I have moderate problems in walking about	I have no problems washing or dressing myself	I have no problems doing my usual activities	I have severe pain or discomfort	I am not anxious or depressed	72	150	77	60	5	25.8
Male	28	Not capable of working	Married	Primary	Non smoker	No	No exercise	Low	Not any	20.5	160	90	18	18	no	I have slight problems in walking about	I have slight problems washing or dressing myself	I have no problems doing my usual activities	I have slight pain or discomfort	I am extremely anxious or depressed	40		I have severe problems in walking about	I have moderate problems washing or dressing myself	I have severe problems doing my usual activities	I have moderate pain or discomfort	I am not anxious or depressed	50	150	82	58.4	5.5	21.4		I have slight problems in walking about	I have no problems washing or dressing myself	I have no problems doing my usual activities	I have severe pain or discomfort	I am not anxious or depressed	45	165	87	60	5.5	22
Male	59	Doing a job	Married	Middle	Non smoker	No	Daily	Low	Diabetes mellitus, Hepatitis	26.2	180	75	96	108	no	I have no problems in walking about	I have no problems washing or dressing myself	I have slight problems doing my usual activities	I have no pain or discomfort	I am not anxious or depressed	85		I have moderate problems in walking about	I have no problems washing or dressing myself	I have severe problems doing my usual activities	I have moderate pain or discomfort	I am not anxious or depressed	87	190	90	76	5.7	26.2		I have moderate problems in walking about	I have no problems washing or dressing myself	I have no problems doing my usual activities	I have severe pain or discomfort	I am not anxious or depressed	80	180	75	76	5.7	26.2
Female	19	not working	Single	Middle	Non smoker	No	Some times	Low	Cardio vascular disease	19.1	150	80	132	72	no	I have slight problems in walking about	I have no problems washing or dressing myself	I have slight problems doing my usual activities	I have severe pain or discomfort	I am moderately anxious or depressed	50		I have moderate problems in walking about	I have no problems washing or dressing myself	I have severe problems doing my usual activities	I have moderate pain or discomfort	I am not anxious or depressed	50	140	75	42	4.9	20		I have slight problems in walking about	I have no problems washing or dressing myself	I have no problems doing my usual activities	I have severe pain or discomfort	I am not anxious or depressed	50	150	80	43	4.9	20.5
Male	66	Private business	Married	Secondary	Ex-smoker	No	No exercise	Normal	Not any	21.2	160	100	60	60	no	I have no problems in walking about	I have no problems washing or dressing myself	I have no problems doing my usual activities	I have moderate pain or discomfort	I am not anxious or depressed	75		I have severe problems in walking about	I have no problems washing or dressing myself	I have severe problems doing my usual activities	I have moderate pain or discomfort	I am not anxious or depressed	80	176	80	65	5.9	21.2		I have slight problems in walking about	I have no problems washing or dressing myself	I have no problems doing my usual activities	I have severe pain or discomfort	I am not anxious or depressed	80	160	100	66	5.9	21.5
Male	49	Doing a job	Married	Secondary	Non smoker	No	No exercise	Low	Not any	24.5	160	100	60	12	no	I have no problems in walking about	I have no problems washing or dressing myself	I have no problems doing my usual activities	I have slight pain or discomfort	I am not anxious or depressed	90		I have slight problems in walking about	I have no problems washing or dressing myself	I have severe problems doing my usual activities	I have moderate pain or discomfort	I am not anxious or depressed	90	160	70	69	5.7	23.8		I have moderate problems in walking about	I have no problems washing or dressing myself	I have no problems doing my usual activities	I have severe pain or discomfort	I am not anxious or depressed	90	170	90	68	5.7
Female	55	Not capable of working	Married	Not educated	Non smoker	No	No exercise	Low	Diabetes mellitus, Hepatitis	31.5	175	90	108	12	yes	I am unable to walk about	I am unable to wash or dress myself	I am unable to do my usual activities	I have severe pain or discomfort	I am slightly anxious or depressed	35		I have slight problems in walking about	I have no problems washing or dressing myself	I have no problems doing my usual activities	I have moderate pain or discomfort	I am not anxious or depressed	25	193	98	56	4.5	30.9		I have moderate problems in walking about	I have no problems washing or dressing myself	I have no problems doing my usual activities	I have severe pain or discomfort	I am not anxious or depressed	30	185	95	55	4.5	30.3
Female	61	Not capable of working	Married	Primary	Non smoker	No	No exercise	Normal	Hepatitis	29.3	180	120	96	84	no	I have severe problems in walking about	I have no problems washing or dressing myself	I am unable to do my usual activities	I have severe pain or discomfort	I am moderately anxious or depressed	40		I have no problems in walking about	I have no problems washing or dressing myself	I have no problems doing my usual activities	I have moderate pain or discomfort	I am not anxious or depressed	50	165	90	68	5	29.3		I have severe problems in walking about	I have no problems washing or dressing myself	I have no problems doing my usual activities	I have severe pain or discomfort	I am not anxious or depressed	45	160	110	68	5	29.3
Male	40	not working	Married	Primary	Non smoker	No	Daily	Normal	Hepatitis	18.5	160	100	60	36	yes	I have slight problems in walking about	I have no problems washing or dressing myself	I have no problems doing my usual activities	I have slight pain or discomfort	I am not anxious or depressed	85		I have no problems in walking about	I have no problems washing or dressing myself	I have no problems doing my usual activities	I have moderate pain or discomfort	I am not anxious or depressed	75	161	100	56	5.6	19.9		I have no problems in walking about	I have no problems washing or dressing myself	I have no problems doing my usual activities	I have severe pain or discomfort	I am not anxious or depressed	75	180	110	57	5.6	20.3
Female	60	Not capable of working	Married	Primary	Non smoker	No	No exercise	Low	Hepatitis	31.4	150	70	228	36	yes	I have moderate problems in walking about	I have no problems washing or dressing myself	I have moderate problems doing my usual activities	I have severe pain or discomfort	I am moderately anxious or depressed	60		I have no problems in walking about	I have no problems washing or dressing myself	I have no problems doing my usual activities	I have moderate pain or discomfort	I am not anxious or depressed	60	173	90	81	5.4	30.7		I have no problems in walking about	I have no problems washing or dressing myself	I have no problems doing my usual activities	I have severe pain or discomfort	I am not anxious or depressed	55	170	90	80	5.4	30.3
Male	40	not working	Married	Higher secondary	Smoker	No	No exercise	Low	Hepatitis	19.7	150	90	240	60	yes	I have severe problems in walking about	I have no problems washing or dressing myself	I have moderate problems doing my usual activities	I have severe pain or discomfort	I am moderately anxious or depressed	50		I have no problems in walking about	I have no problems washing or dressing myself	I have no problems doing my usual activities	I have moderate pain or discomfort	I am not anxious or depressed	50	151	74	65	5.11	20		I have no problems in walking about	I have no problems washing or dressing myself	I have no problems doing my usual activities	I have severe pain or discomfort	I am not anxious or depressed	50	150	90	66	5.11	20.3
Male	48	Not capable of working	Married	Graduate	Non smoker	No	No exercise	Low	Not any	23.3	140	90	72	24	yes	I have moderate problems in walking about	I have no problems washing or dressing myself	I have slight problems doing my usual activities	I have slight pain or discomfort	I am not anxious or depressed	50		I have no problems in walking about	I have no problems washing or dressing myself	I have no problems doing my usual activities	I have moderate pain or discomfort	I am not anxious or depressed	55	145	70	75.8	6	22.7		I have no problems in walking about	I have no problems washing or dressing myself	I have no problems doing my usual activities	I have severe pain or discomfort	I am not anxious or depressed	50	148	88	74	6	22.1
Male	52	Not capable of working	Married	Middle	Ex-smoker	No	No exercise	Low	Diabetes mellitus	26	150	90	16	16	no	I have severe problems in walking about	I have no problems washing or dressing myself	I have severe problems doing my usual activities	I have slight pain or discomfort	I am not anxious or depressed	50		I have no problems in walking about	I have no problems washing or dressing myself	I have no problems doing my usual activities	I have moderate pain or discomfort	I am not anxious or depressed	55	158	84	71.7	5.6	25.5		I have slight problems in walking about	I have no problems washing or dressing myself	I have no problems doing my usual activities	I have severe pain or discomfort	I am not anxious or depressed	47	150	90	70	5.6	24.9
Male	70	Not capable of working	Married	Graduate	Non smoker	No	Once a week	Low	Not any	22.8	150	90	36	36	no	I have moderate problems in walking about	I have no problems washing or dressing myself	I have severe problems doing my usual activities	I have no pain or discomfort	I am not anxious or depressed	70		I have no problems in walking about	I have no problems washing or dressing myself	I have no problems doing my usual activities	I have moderate pain or discomfort	I am not anxious or depressed	75	162	88	69	5.8	23.1		I have slight problems in walking about	I have no problems washing or dressing myself	I have no problems doing my usual activities	I have severe pain or discomfort	I am not anxious or depressed	73	165	100	70	5.8	23.5
Female	50	Not capable of working	Married	Higher secondary	Non smoker	No	No exercise	Normal	Diabetes mellitus	32.5	150	90	66	24	no	I have severe problems in walking about	I have severe problems washing or dressing myself	I have slight problems doing my usual activities	I have extreme pain or discomfort	I am extremely anxious or depressed	50		I have severe problems in walking about	I have no problems washing or dressing myself	I have no problems doing my usual activities	I have moderate pain or discomfort	I am not anxious or depressed	50	165	82	87	5.4	32.9		I have slight problems in walking about	I have no problems washing or dressing myself	I have no problems doing my usual activities	I have severe pain or discomfort	I am not anxious or depressed	50	155	92	87	5.4
Male	31	Not capable of working	Married	Secondary	Non smoker	No	No exercise	Normal	Hepatitis	18.9	141	86	120	120	yes	I have severe problems in walking about	I have no problems washing or dressing myself	I am unable to do my usual activities	I have severe pain or discomfort	I am moderately anxious or depressed	40		I have no problems in walking about	I have no problems washing or dressing myself	I am unable to do my usual activities	I have moderate pain or discomfort	I am not anxious or depressed	45	142	78	54	5.6	19.2		I have no problems in walking about	I have no problems washing or dressing myself	I have no problems doing my usual activities	I have severe pain or discomfort	I am not anxious or depressed	45	150	90	54	5.6	19.2
Male	32	Not capable of working	Married	Not educated	Ex-smoker	No	No exercise	Low	Hepatitis	26.2	173	75	120	36	no	I have no problems in walking about	I have no problems washing or dressing myself	I have severe problems doing my usual activities	I have extreme pain or discomfort	I am moderately anxious or depressed	40		I have no problems in walking about	I have no problems washing or dressing myself	I am unable to do my usual activities	I have moderate pain or discomfort	I am not anxious or depressed	40	170	90	54	4.8	27.7		I have no problems in walking about	I have no problems washing or dressing myself	I have no problems doing my usual activities	I have severe pain or discomfort	I am not anxious or depressed	35	158	80	55	4.8	27.2
Male	33	Doing a job	Married	Higher secondary	Non smoker	No	No exercise	Low	Not any	18.1	166	100	48	48	yes	I have no problems in walking about	I have no problems washing or dressing myself	I have no problems doing my usual activities	I have severe pain or discomfort	I am moderately anxious or depressed	44		I have slight problems in walking about	I have no problems washing or dressing myself	I have slight problems doing my usual activities	I have severe pain or discomfort	I am not anxious or depressed	40	166	93	55	5.8	18.4		I have no problems in walking about	I have no problems washing or dressing myself	I have no problems doing my usual activities	I have severe pain or discomfort	I am not anxious or depressed	40	160	100	55	5.8	18.4
Female	50	Not capable of working	Married	Secondary	Non smoker	No	No exercise	Low	Diabetes mellitus	25.7	185	86	12	6	yes	I am unable to walk about	I am unable to wash or dress myself	I am unable to do my usual activities	I have extreme pain or discomfort	I am slightly anxious or depressed	20		I have severe problems in walking about	I have no problems washing or dressing myself	I have slight problems doing my usual activities	I have severe pain or discomfort	I am not anxious or depressed	25	199	108	52	4.8	25.7		I have no problems in walking about	I have no problems washing or dressing myself	I have no problems doing my usual activities	I have severe pain or discomfort	I am not anxious or depressed	20	190	89	54	4.8	26.7
Male	44	not working	Married	Secondary	Smoker	No	No exercise	Normal	Hepatitis	18.1	143	73	48	48	no	I have moderate problems in walking about	I have no problems washing or dressing myself	I have severe problems doing my usual activities	I have severe pain or discomfort	I am not anxious or depressed	45		I have moderate problems in walking about	I have no problems washing or dressing myself	I have severe problems doing my usual activities	I have severe pain or discomfort	I am not anxious or depressed	50	140	80	64	6.2	18.1		I have no problems in walking about	I have no problems washing or dressing myself	I have no problems doing my usual activities	I have severe pain or discomfort	I am not anxious or depressed	50	150	77	65	6.2	18.4
Female	65	Not capable of working	Married	Higher secondary	Ex-smoker	No	No exercise	Low	Hepatitis	25	180	100	120	30	yes	I have severe problems in walking about	I have no problems washing or dressing myself	I have severe problems doing my usual activities	I have severe pain or discomfort	I am moderately anxious or depressed	50		I have moderate problems in walking about	I have no problems washing or dressing myself	I have severe problems doing my usual activities	I have severe pain or discomfort	I am not anxious or depressed	45	160	85	60	5	25.8		I have no problems in walking about	I have no problems washing or dressing myself	I have no problems doing my usual activities	I have severe pain or discomfort	I am not anxious or depressed	50	170	90	60	5	25.8
Female	52	Not capable of working	Married	Middle	Non smoker	No	No exercise	Low	Hepatitis	23.2	160	90	60	60	no	I have slight problems in walking about	I have no problems washing or dressing myself	I have no problems doing my usual activities	I have severe pain or discomfort	I am extremely anxious or depressed	40		I have slight problems in walking about	I have no problems washing or dressing myself	I have no problems doing my usual activities	I have severe pain or discomfort	I am not anxious or depressed	50	170	90	46	4.8	22.7		I have no problems in walking about	I have no problems washing or dressing myself	I have no problems doing my usual activities	I have severe pain or discomfort	I am not anxious or depressed	50	150	86	46	4.8
Male	55	Not capable of working	Married	Higher secondary	Ex-smoker	No	No exercise	Normal	Not any	30.8	140	80	60	60	yes	I have no problems in walking about	I have no problems washing or dressing myself	I have no problems doing my usual activities	I have severe pain or discomfort	I am not anxious or depressed	80		I have moderate problems in walking about	I have no problems washing or dressing myself	I have no problems doing my usual activities	I have severe pain or discomfort	I am not anxious or depressed	75	152	80	92.4	5.8	31		I have severe problems in walking about	I have no problems washing or dressing myself	I have no problems doing my usual activities	I have severe pain or discomfort	I am not anxious or depressed	70	150	85	93	5.8	31.2
Male	40	Not capable of working	Married	Graduate	Ex-smoker	No	No exercise	Low	Not any	27.6	150	90	24	24	no	I have slight problems in walking about	I have no problems washing or dressing myself	I have no problems doing my usual activities	I have severe pain or discomfort	I am moderately anxious or depressed	35		I have no problems in walking about	I have no problems washing or dressing myself	I have no problems doing my usual activities	I have severe pain or discomfort	I am not anxious or depressed	35	144	70	74	5.4	28		I have severe problems in walking about	I have no problems washing or dressing myself	I have no problems doing my usual activities	I have severe pain or discomfort	I am not anxious or depressed	30	140	88	74	5.4	28
Male	42	Doing a job	Married	Higher secondary	Non smoker	No	Daily	Low	Not any	22.4	160	90	96	36	yes	I have slight problems in walking about	I have no problems washing or dressing myself	I have no problems doing my usual activities	I have moderate pain or discomfort	I am not anxious or depressed	55		I have severe problems in walking about	I have no problems washing or dressing myself	I have no problems doing my usual activities	I have severe pain or discomfort	I am not anxious or depressed	50	167	75	64	5.6	22.8		I have no problems in walking about	I have no problems washing or dressing myself	I have no problems doing my usual activities	I have extreme pain or discomfort	I am not anxious or depressed	50	170	94	64	5.6	22.8
Female	55	Not capable of working	Married	Not educated	Non smoker	No	No exercise	Low	Diabetes mellitus	39.9	160	100	60	12	yes	I have moderate problems in walking about	I have severe problems washing or dressing myself	I have severe problems doing my usual activities	I have no pain or discomfort	I am severely anxious or depressed	30		I have severe problems in walking about	I have no problems washing or dressing myself	I am unable to do my usual activities	I have severe pain or discomfort	I am not anxious or depressed	35	161	90	76	4.6	40.4		I have no problems in walking about	I have no problems washing or dressing myself	I have no problems doing my usual activities	I have extreme pain or discomfort	I am not anxious or depressed	30	153	97	77	4.6
Female	46	not working	Married	Secondary	Non smoker	No	Some times	Low	Not any	19.9	170	90	60	6	no	I have moderate problems in walking about	I have no problems washing or dressing myself	I have severe problems doing my usual activities	I have moderate pain or discomfort	I am slightly anxious or depressed	65		I have severe problems in walking about	I have severe problems washing or dressing myself	I am unable to do my usual activities	I have severe pain or discomfort	I am not anxious or depressed	70	150	80	56	5.6	19.9		I have moderate problems in walking about	I have no problems washing or dressing myself	I have no problems doing my usual activities	I have extreme pain or discomfort	I am not anxious or depressed	70	160	85	56	5.6	19.9
Male	30	not working	Married	Higher secondary	Non smoker	No	No exercise	Low	Hepatitis	19.1	170	90	30	3	no	I have no problems in walking about	I have no problems washing or dressing myself	I have moderate problems doing my usual activities	I have moderate pain or discomfort	I am not anxious or depressed	60		I have severe problems in walking about	I have severe problems washing or dressing myself	I am unable to do my usual activities	I have severe pain or discomfort	I am not anxious or depressed	65	162	85	51	5.5	18.7		I have no problems in walking about	I have no problems washing or dressing myself	I have no problems doing my usual activities	I have extreme pain or discomfort	I am not anxious or depressed	60	180	90	51	5.5	18.7
Female	66	Retired	Married	Graduate	Ex-smoker	No	No exercise	Normal	Diabetes mellitus, Hepatitis	21.1	150	80	72	8	yes	I have severe problems in walking about	I am unable to wash or dress myself	I am unable to do my usual activities	I have severe pain or discomfort	I am not anxious or depressed	30		I have severe problems in walking about	I am unable to wash or dress myself	I am unable to do my usual activities	I have severe pain or discomfort	I am not anxious or depressed	35	179	90	63	5.8	21.1		I have moderate problems in walking about	I have no problems washing or dressing myself	I am unable to do my usual activities	I have extreme pain or discomfort	I am not anxious or depressed	35	159	85	63	5.8	21.1
Male	29	Doing a job	Single	Graduate	Non smoker	No	Once a week	Low	Not any	19.4	160	80	18	18	yes	I have no problems in walking about	I have no problems washing or dressing myself	I have slight problems doing my usual activities	I have slight pain or discomfort	I am not anxious or depressed	50		I am unable to walk about	I have no problems washing or dressing myself	I am unable to do my usual activities	I have severe pain or discomfort	I am not anxious or depressed	50	143	77	45	5	19.4		I have severe problems in walking about	I have no problems washing or dressing myself	I am unable to do my usual activities	I have extreme pain or discomfort	I am not anxious or depressed	50	150	90	46	5
Male	25	not working	Single	Secondary	Non smoker	No	No exercise	Low	Not any	19	157	96	96	12	no	I have slight problems in walking about	I have no problems washing or dressing myself	I have no problems doing my usual activities	I have no pain or discomfort	I am not anxious or depressed	90		I am unable to walk about	I have no problems washing or dressing myself	I am unable to do my usual activities	I have severe pain or discomfort	I am not anxious or depressed	90	160	90	47	5.2	19		I have no problems in walking about	I have no problems washing or dressing myself	I am unable to do my usual activities	I have extreme pain or discomfort	I am not anxious or depressed	90	150	90	47	5.2
Male	57	Retired	Married	Graduate	Non smoker	No	No exercise	Low	Hepatitis	29.6	159	89	180	96	yes	I have no problems in walking about	I have no problems washing or dressing myself	I have no problems doing my usual activities	I have severe pain or discomfort	I am not anxious or depressed	70		I am unable to walk about	I have no problems washing or dressing myself	I am unable to do my usual activities	I have extreme pain or discomfort	I am not anxious or depressed	60	170	95	70	5.1	29.2		I am unable to walk about	I am unable to wash or dress myself	I am unable to do my usual activities	I have extreme pain or discomfort	I am not anxious or depressed	65	160	90	70	5.1	29.2
Female	38	Private business	Married	Middle	Non smoker	No	Once a week	Low	Kidney stone surgery	36.7	162	90			no	I have moderate problems in walking about	I have no problems washing or dressing myself	I have slight problems doing my usual activities	I have slight pain or discomfort	I am not anxious or depressed	50		I have slight problems in walking about	I have no problems washing or dressing myself	I have slight problems doing my usual activities	I have no pain or discomfort	I am not anxious or depressed	50	142	78	96	5.4	36.3		I am unable to walk about	I am unable to wash or dress myself	I am unable to do my usual activities	I have extreme pain or discomfort	I am not anxious or depressed	50	140	85	95	5.4	35.9
Male	37	Labour	Married	Higher secondary	Non smoker	No	No exercise		Diabetes mellitus	27.1	145	88	72	1	no	I am unable to walk about	I am unable to wash or dress myself	I am unable to do my usual activities	I have severe pain or discomfort	I am slightly anxious or depressed	20		I have no problems in walking about	I have no problems washing or dressing myself	I have slight problems doing my usual activities	I have no pain or discomfort	I am not anxious or depressed	20	140	73	73	5.5	26.8		I am unable to walk about	I am unable to wash or dress myself	I am unable to do my usual activities	I have no pain or discomfort	I am not anxious or depressed	20	150	90	73	5.5	26.8
Female	60	Not capable of working	Married	Secondary	Non smoker	No	No exercise	Normal	Cardio vascular disease	27.1	157	84	12	8	no	I have moderate problems in walking about	I have severe problems washing or dressing myself	I am unable to do my usual activities	I have moderate pain or discomfort	I am not anxious or depressed	40		I have no problems in walking about	I have no problems washing or dressing myself	I have slight problems doing my usual activities	I have no pain or discomfort	I am not anxious or depressed	45	165	92	75	5.5	27.5		I am unable to walk about	I have no problems washing or dressing myself	I am unable to do my usual activities	I have no pain or discomfort	I am not anxious or depressed	45	175	100	75	5.5	27.5
Male	45	not working	Married	Primary	Non smoker	No	No exercise	Normal	Diabetes mellitus	41	160	64	48	3	no	I have moderate problems in walking about	I have no problems washing or dressing myself	I am unable to do my usual activities	I have no pain or discomfort	I am not anxious or depressed	70		I have slight problems in walking about	I have no problems washing or dressing myself	I have moderate problems doing my usual activities	I have no pain or discomfort	I am not anxious or depressed	65	180	100	83	4.8	41		I have severe problems in walking about	I have moderate problems washing or dressing myself	I am unable to do my usual activities	I have no pain or discomfort	I am not anxious or depressed	72	160	64	82	4.8
Female	38	Private business	Married	Secondary	Non smoker	No	No exercise	Normal	Diabetes mellitus	24.2	140	68	84	48	no	I have slight problems in walking about	I have no problems washing or dressing myself	I have moderate problems doing my usual activities	I have slight pain or discomfort	I am not anxious or depressed	70		I have moderate problems in walking about	I have no problems washing or dressing myself	I have moderate problems doing my usual activities	I have no pain or discomfort	I am not anxious or depressed	73	141	70	70	5.6	24.2		I have severe problems in walking about	I have moderate problems washing or dressing myself	I am unable to do my usual activities	I have no pain or discomfort	I am not anxious or depressed	70	147	68	70	5.6	24.9
Male	40	not working	Married	Primary	Non smoker	No	Once a week	Low	Hepatitis	20.3	150	80	30	24	no	I have no problems in walking about	I have no problems washing or dressing myself	I have moderate problems doing my usual activities	I have no pain or discomfort	I am slightly anxious or depressed	85		I have moderate problems in walking about	I have no problems washing or dressing myself	I have severe problems doing my usual activities	I have no pain or discomfort	I am not anxious or depressed	80	171	89	43	4.8	21.3		I have severe problems in walking about	I have moderate problems washing or dressing myself	I am unable to do my usual activities	I have no pain or discomfort	I am not anxious or depressed	80	150	80	45	4.8	22.2
Female	58	Not capable of working	Married	Primary	Ex-smoker	No	No exercise	Low	Cardio vascular disease, Diabetes mellitus	21.3	160	90	36	2	no	I have slight problems in walking about	I have no problems washing or dressing myself	I am unable to do my usual activities	I have severe pain or discomfort	I am severely anxious or depressed	40		I have slight problems in walking about	I have no problems washing or dressing myself	I have no problems doing my usual activities	I have no pain or discomfort	I am not anxious or depressed	40	152	79	61	5.6	21.7		I have slight problems in walking about	I have severe problems washing or dressing myself	I am unable to do my usual activities	I have no pain or discomfort	I am not anxious or depressed	45	160	90	62	5.6	22.1
Male	31	not working	Single	Middle	Non smoker	No	No exercise	Low	Hepatitis	22.6	167	80	48	48	no	I have severe problems in walking about	I have no problems washing or dressing myself	I am unable to do my usual activities	I have moderate pain or discomfort	I am slightly anxious or depressed	60		I have slight problems in walking about	I have no problems washing or dressing myself	I have no problems doing my usual activities	I have no pain or discomfort	I am not anxious or depressed	65	195	101	66	5.8	22.1		I have slight problems in walking about	I have no problems washing or dressing myself	I am unable to do my usual activities	I have no pain or discomfort	I am not anxious or depressed	65	180	95	66	5.8	22.1
Female	49	not working	Married	Secondary	Non smoker	No	No exercise	Low	Hepatitis	21.1	169	92	102	78	no	I have moderate problems in walking about	I have no problems washing or dressing myself	I have severe problems doing my usual activities	I have no pain or discomfort	I am moderately anxious or depressed	70		I have slight problems in walking about	I have no problems washing or dressing myself	I have no problems doing my usual activities	I have no pain or discomfort	I am not anxious or depressed	60	153	88	62	5.7	21.4		I have slight problems in walking about	I have no problems washing or dressing myself	I am unable to do my usual activities	I have no pain or discomfort	I am not anxious or depressed	65	150	80	63	5.7	21.8
Male	65	Not capable of working	Married	Secondary	Non smoker	No	No exercise	Low	Diabetes mellitus, End stage renal disease	19.2	170	100	12	3	yes	I am unable to walk about	I am unable to wash or dress myself	I am unable to do my usual activities	I have no pain or discomfort	I am slightly anxious or depressed	40		I have slight problems in walking about	I have no problems washing or dressing myself	I have no problems doing my usual activities	I have no pain or discomfort	I am not anxious or depressed	45	170	100	55	5.6	19.6		I have slight problems in walking about	I have no problems washing or dressing myself	I am unable to do my usual activities	I have no pain or discomfort	I am not anxious or depressed	43	190	110	55	5.6	19.6
Male	52	Not capable of working	Married	Secondary	Ex-smoker	No	No exercise	Low	Diabetes mellitus	20	178	98	12	6	no	I have no problems in walking about	I have severe problems washing or dressing myself	I am unable to do my usual activities	I have no pain or discomfort	I am extremely anxious or depressed	60		I have no problems in walking about	I have no problems washing or dressing myself	I have no problems doing my usual activities	I have no pain or discomfort	I am not anxious or depressed	55	166	90	58	5.6	20		I have slight problems in walking about	I have no problems washing or dressing myself	I am unable to do my usual activities	I have no pain or discomfort	I am not anxious or depressed	58	155	85	57	5.6	20.3
Male	60	Not capable of working	Married	Not educated	Non smoker	No	No exercise	Low	Diabetes mellitus	27.6	165	62	180	4	no	I am unable to walk about	I am unable to wash or dress myself	I am unable to do my usual activities	I have severe pain or discomfort	I am slightly anxious or depressed	30		I have no problems in walking about	I have no problems washing or dressing myself	I have no problems doing my usual activities	I have no pain or discomfort	I am not anxious or depressed	30	175	78	65	5	28		I have slight problems in walking about	I have no problems washing or dressing myself	I am unable to do my usual activities	I have no pain or discomfort	I am not anxious or depressed	30	165	62	65	5	28
Male	28	Doing a job	Married	Secondary	Non smoker	No	No exercise	Low	Not any	28.8	170	90	36	5	no	I have no problems in walking about	I have no problems washing or dressing myself	I have severe problems doing my usual activities	I have severe pain or discomfort	I am severely anxious or depressed	60		I have no problems in walking about	I have no problems washing or dressing myself	I have no problems doing my usual activities	I have no pain or discomfort	I am not anxious or depressed	50	190	100	83.6	5.5	30.7		I have moderate problems in walking about	I have no problems washing or dressing myself	I am unable to do my usual activities	I have no pain or discomfort	I am not anxious or depressed	50	170	90	85	5.5	31.2
Male	45	Private business	Married	Graduate	Non smoker	No	No exercise	Low	Diabetes mellitus	27.5	170	90	3	3	no	I have slight problems in walking about	I have no problems washing or dressing myself	I have slight problems doing my usual activities	I have moderate pain or discomfort	I am severely anxious or depressed	60		I have no problems in walking about	I have no problems washing or dressing myself	I have no problems doing my usual activities	I have no pain or discomfort	I am not anxious or depressed	65	142	78	81	5.8	27.2		I have slight problems in walking about	I have no problems washing or dressing myself	I am unable to do my usual activities	I have no pain or discomfort	I am not anxious or depressed	65	160	97	80	5.8	26.6
Male	40	not working	Married	Not educated	Ex-smoker	No	No exercise	Low	Not any	18.1	150	100	30	30	no	I have slight problems in walking about	I have no problems washing or dressing myself	I have no problems doing my usual activities	I have no pain or discomfort	I am not anxious or depressed	90		I have no problems in walking about	I have no problems washing or dressing myself	I have no problems doing my usual activities	I have no pain or discomfort	I am not anxious or depressed	90	165	95	54	5.8	18.1		I have slight problems in walking about	I have no problems washing or dressing myself	I am unable to do my usual activities	I have no pain or discomfort	I am not anxious or depressed	90	170	100	54	5.8	18.1
Female	41	Not capable of working	Married	Primary	Non smoker	No	No exercise	Normal	Diabetes mellitus	23.5	140	73	120	10	no	I am unable to walk about	I am unable to wash or dress myself	I am unable to do my usual activities	I have no pain or discomfort	I am moderately anxious or depressed	30		I have moderate problems in walking about	I have severe problems washing or dressing myself	I am unable to do my usual activities	I have no pain or discomfort	I am not anxious or depressed	30	158	80	60	4.4	34.4		I have slight problems in walking about	I have no problems washing or dressing myself	I am unable to do my usual activities	I have no pain or discomfort	I am not anxious or depressed	35	150	80	60	4.4	34.4
Male	51	not working	Married	Middle	Non smoker	No	No exercise	Low	Hepatitis	24.2	190	84	36	36	yes	I have slight problems in walking about	I have no problems washing or dressing myself	I have no problems doing my usual activities	I have moderate pain or discomfort	I am not anxious or depressed	80		I have no problems in walking about	I have no problems washing or dressing myself	I have no problems doing my usual activities	I have moderate pain or discomfort	I am not anxious or depressed	75	163	70	48	4.8	23.7		I have slight problems in walking about	I have no problems washing or dressing myself	I am unable to do my usual activities	I have no pain or discomfort	I am not anxious or depressed	70	170	74	48	4.8	23.7
Female	38	not working	Married	Not educated	Non smoker	No	No exercise	Low	Diabetes mellitus	28.1	156	82	120	12	no	I have moderate problems in walking about	I have no problems washing or dressing myself	I have slight problems doing my usual activities	I have moderate pain or discomfort	I am not anxious or depressed	75		I am unable to walk about	I have no problems washing or dressing myself	I am unable to do my usual activities	I have severe pain or discomfort	I am not anxious or depressed	70	157	85	71	5.4	26.9		I have no problems in walking about	I have no problems washing or dressing myself	I am unable to do my usual activities	I have no pain or discomfort	I am not anxious or depressed	70	140	80	70	5.4	26.5
Male	34	Private business	Married	Middle	Non smoker	No	Daily	Low	Not any	26.9	170	84	96	36	yes	I have slight problems in walking about	I have no problems washing or dressing myself	I have no problems doing my usual activities	I have slight pain or discomfort	I am not anxious or depressed	85		I have slight problems in walking about	I have no problems washing or dressing myself	I have moderate problems doing my usual activities	I have slight pain or discomfort	I am not anxious or depressed	85	155	70	77	5.7	26.6		I have no problems in walking about	I have no problems washing or dressing myself	I am unable to do my usual activities	I have no pain or discomfort	I am not anxious or depressed	80	150	65	76	5.7	26.2
Male	34	Private business	Married	Middle	Non smoker	No	Daily	Low	Not any	26.9	170	84	96	36	yes	I have slight problems in walking about	I have no problems washing or dressing myself	I have no problems doing my usual activities	I have slight pain or discomfort	I am not anxious or depressed	85		I have moderate problems in walking about	I have no problems washing or dressing myself	I am unable to do my usual activities	I have severe pain or discomfort	I am not anxious or depressed	80	197	90	79	5.7	27.7		I have severe problems in walking about	I have no problems washing or dressing myself	I am unable to do my usual activities	I have no pain or discomfort	I am not anxious or depressed	80	190	75	79	5.7	27.7
Male	31	not working	Single	Graduate	Non smoker	No	No exercise	Low	Not any	22.5	182	105	48	36	yes	I have no problems in walking about	I have no problems washing or dressing myself	I have no problems doing my usual activities	I have moderate pain or discomfort	I am not anxious or depressed	90		I have severe problems in walking about	I have slight problems washing or dressing myself	I have severe problems doing my usual activities	I have extreme pain or discomfort	I am not anxious or depressed	85	160	80	71	5.1	29.6		I have severe problems in walking about	I have no problems washing or dressing myself	I am unable to do my usual activities	I have no pain or discomfort	I am not anxious or depressed	90	175	100	71	5.1	29.6
Male	40	Doing a job	Single	Middle	Ex-smoker	No	Daily	Low	Not any	23.8	174	82	36	36	no	I have slight problems in walking about	I have no problems washing or dressing myself	I have moderate problems doing my usual activities	I have moderate pain or discomfort	I am not anxious or depressed	60		I have severe problems in walking about	I have moderate problems washing or dressing myself	I have severe problems doing my usual activities	I have extreme pain or discomfort	I am not anxious or depressed	65	180	90	68	5.6	24.2		I have severe problems in walking about	I am unable to wash or dress myself	I am unable to do my usual activities	I have no pain or discomfort	I am not anxious or depressed	60	185	95	69	5.6	24.6
Female	30	Not capable of working	Single	Primary	Non smoker	No	No exercise	Low	Hepatitis	27.1	160	90	12	12	no	I have severe problems in walking about	I have severe problems washing or dressing myself	I have severe problems doing my usual activities	I have severe pain or discomfort	I am moderately anxious or depressed	45		I have severe problems in walking about	I have no problems washing or dressing myself	I have no problems doing my usual activities	I have extreme pain or discomfort	I am not anxious or depressed	40	170	78	50	4.6	26.6		I have severe problems in walking about	I am unable to wash or dress myself	I am unable to do my usual activities	I have no pain or discomfort	I am not anxious or depressed	40	150	98	50	4.6	26.6
Male	48	not working	Married	Secondary	Non smoker	No	No exercise	Normal	Hepatitis	22.7	134	81	120	12	no	I have slight problems in walking about	I have no problems washing or dressing myself	I have severe problems doing my usual activities	I have moderate pain or discomfort	I am not anxious or depressed	45		I am unable to walk about	I have no problems washing or dressing myself	I am unable to do my usual activities	I have extreme pain or discomfort	I am not anxious or depressed	45	185	97	61	5.5	22.4		I have severe problems in walking about	I am unable to wash or dress myself	I am unable to do my usual activities	I have no pain or discomfort	I am not anxious or depressed	40	164	110	61	5.5	22.4
Male	55	Not capable of working	Married	Secondary	Non smoker	No	No exercise	Normal	Diabetes mellitus, Hepatitis	22.1	150	90	24	12	yes	I have severe problems in walking about	I have no problems washing or dressing myself	I have moderate problems doing my usual activities	I have severe pain or discomfort	I am not anxious or depressed	50		I have slight problems in walking about	I have no problems washing or dressing myself	I have slight problems doing my usual activities	I have no pain or discomfort	I am not anxious or depressed	50	140	70	70	5.1	22.1		I have moderate problems in walking about	I have no problems washing or dressing myself	I am unable to do my usual activities	I have no pain or discomfort	I am not anxious or depressed	50	150	90	69	5.1	28.7
Male	55	Farmer	Married	Not educated	Ex-smoker	No	No exercise	Normal	Diabetes mellitus	15.8	140	90	6	6	no	I am unable to walk about	I am unable to wash or dress myself	I am unable to do my usual activities	I have severe pain or discomfort	I am not anxious or depressed	25		I have no problems in walking about	I have no problems washing or dressing myself	I have slight problems doing my usual activities	I have no pain or discomfort	I am not anxious or depressed	20	150	80	52	6	15.5		I have severe problems in walking about	I have no problems washing or dressing myself	I am unable to do my usual activities	I have no pain or discomfort	I am not anxious or depressed	20	147	87	52	6	15.5
Female	30	not working	Married	Secondary	Non smoker	No	No exercise	Normal	Not any	20.2	140	80	36	36	no	I have no problems in walking about	I have no problems washing or dressing myself	I have no problems doing my usual activities	I have slight pain or discomfort	I am not anxious or depressed	90		I have moderate problems in walking about	I have no problems washing or dressing myself	I have severe problems doing my usual activities	I have no pain or discomfort	I am not anxious or depressed	90	167	85	49	5.1	20.4		I have moderate problems in walking about	I have no problems washing or dressing myself	I am unable to do my usual activities	I have no pain or discomfort	I am not anxious or depressed	95	150	90	49	5.1	20.4
Female	24	not working	Married	Secondary	Non smoker	No	No exercise	Low	Not any	30.3	162	97	24	24	no	I have no problems in walking about	I have no problems washing or dressing myself	I have slight problems doing my usual activities	I have slight pain or discomfort	I am not anxious or depressed	80		I am unable to walk about	I have no problems washing or dressing myself	I am unable to do my usual activities	I have no pain or discomfort	I am not anxious or depressed	80	155	78	55	4.5	30.3		I have severe problems in walking about	I have no problems washing or dressing myself	I am unable to do my usual activities	I have no pain or discomfort	I am not anxious or depressed	75	145	90	56	4.5	30.9
Male	38	Private business	Married	Middle	Non smoker	No	No exercise	Normal	Not any	24.9	149	95	120	54	no	I have no problems in walking about	I have no problems washing or dressing myself	I have slight problems doing my usual activities	I have no pain or discomfort	I am moderately anxious or depressed	70		I am unable to walk about	I have no problems washing or dressing myself	I am unable to do my usual activities	I have no pain or discomfort	I am not anxious or depressed	70	180	98	69	5.6	24.6		I have severe problems in walking about	I have no problems washing or dressing myself	I am unable to do my usual activities	I have no pain or discomfort	I am not anxious or depressed	70	163	105	68	5.6	24.2
Male	41	not working	Married	Secondary	Non smoker	No	Daily	Normal	Not any	22.8	150	80	156	156	yes	I have slight problems in walking about	I have no problems washing or dressing myself	I have no problems doing my usual activities	I have slight pain or discomfort	I am not anxious or depressed	80		I have moderate problems in walking about	I have severe problems washing or dressing myself	I am unable to do my usual activities	I have no pain or discomfort	I am not anxious or depressed	80	158	85	64	5.6	22.8		I have severe problems in walking about	I have no problems washing or dressing myself	I am unable to do my usual activities	I have no pain or discomfort	I am not anxious or depressed	83	150	80	65	5.6	23.1
Female	30	not working	Married	Secondary	Non smoker	No	No exercise	Low	Cardio vascular disease	15.5	169	103	120	24	yes	I have severe problems in walking about	I have severe problems washing or dressing myself	I have severe problems doing my usual activities	I have severe pain or discomfort	I am extremely anxious or depressed	40		I am unable to walk about	I have no problems washing or dressing myself	I am unable to do my usual activities	I have no pain or discomfort	I am not anxious or depressed	45	175	90	41	5.4	15.5		I have severe problems in walking about	I have no problems washing or dressing myself	I am unable to do my usual activities	I have no pain or discomfort	I am not anxious or depressed	42	171	100	41	5.4	15.5
Male	29	not working	Married	Middle	Non smoker	No	Daily	Low	Not any	17	155	80	12	12	yes	I have no problems in walking about	I have no problems washing or dressing myself	I have no problems doing my usual activities	I have no pain or discomfort	I am slightly anxious or depressed	90		I am unable to walk about	I have no problems washing or dressing myself	I am unable to do my usual activities	I have severe pain or discomfort	I am not anxious or depressed	85	148	74	60	6.2	17		I have severe problems in walking about	I have no problems washing or dressing myself	I am unable to do my usual activities	I have no pain or discomfort	I am not anxious or depressed	87	140	75	60	6.2	17
Male	36	Not capable of working	Married	Graduate	Non smoker	No	No exercise	Low	Not any	21.8	175	100	48	48	no	I have slight problems in walking about	I have no problems washing or dressing myself	I have slight problems doing my usual activities	I have severe pain or discomfort	I am moderately anxious or depressed	60		I have moderate problems in walking about	I have no problems washing or dressing myself	I am unable to do my usual activities	I have severe pain or discomfort	I am not anxious or depressed	65	190	90	64	5.7	22.1		I have severe problems in walking about	I have no problems washing or dressing myself	I am unable to do my usual activities	I have no pain or discomfort	I am not anxious or depressed	63	185	108	65	5.7	22.4
Male	45	Private business	Married	Secondary	Non smoker	No	No exercise	Low	Diabetes mellitus	19.9	153	86	120	24	yes	I have moderate problems in walking about	I have no problems washing or dressing myself	I have no problems doing my usual activities	I have slight pain or discomfort	I am not anxious or depressed	75		I am unable to walk about	I have no problems washing or dressing myself	I am unable to do my usual activities	I have severe pain or discomfort	I am not anxious or depressed	70	150	70	52	5.3	20.3		I have severe problems in walking about	I have no problems washing or dressing myself	I am unable to do my usual activities	I have no pain or discomfort	I am not anxious or depressed	71	157	88	53	5.3	20.7
Male	34	not working	Married	Secondary	Non smoker	No	No exercise	Normal	Not any	19.3	141	80	48	48	yes	I have slight problems in walking about	I have no problems washing or dressing myself	I have no problems doing my usual activities	I have moderate pain or discomfort	I am moderately anxious or depressed	60		I have slight problems in walking about	I have no problems washing or dressing myself	I have moderate problems doing my usual activities	I have extreme pain or discomfort	I am not anxious or depressed	65	190	100	57	5.7	19.7		I am unable to walk about	I have no problems washing or dressing myself	I am unable to do my usual activities	I have no pain or discomfort	I am not anxious or depressed	60	170	100	57	5.7	19.7
Female	56	Not capable of working	Married	Secondary	Non smoker	No	No exercise	Normal	Diabetes mellitus	29.7	163	55	96	24	yes	I have slight problems in walking about	I have no problems washing or dressing myself	I have slight problems doing my usual activities	I have slight pain or discomfort	I am not anxious or depressed	60		I have severe problems in walking about	I have no problems washing or dressing myself	I have slight problems doing my usual activities	I have no pain or discomfort	I am not anxious or depressed	60	160	90	60	4.8	29.7		I have slight problems in walking about	I have no problems washing or dressing myself	I have moderate problems doing my usual activities	I have no pain or discomfort	I am not anxious or depressed	65	143	67	60	4.8	29.7
Male	47	Private business	Married	Graduate	Non smoker	No	Daily	Normal	Diabetes mellitus	26.8	140	80	48	12	no	I have moderate problems in walking about	I have no problems washing or dressing myself	I have no problems doing my usual activities	I have severe pain or discomfort	I am not anxious or depressed	70		I have slight problems in walking about	I have slight problems washing or dressing myself	I have severe problems doing my usual activities	I have no pain or discomfort	I am not anxious or depressed	65	145	70	79	5.8	26.5		I have moderate problems in walking about	I have no problems washing or dressing myself	I have severe problems doing my usual activities	I have no pain or discomfort	I am not anxious or depressed	73	150	80	78	5.8	26.1
Male	26	not working	Single	Higher secondary	Non smoker	No	No exercise	Normal	Not any	18.7	161	84	24	24	no	I have slight problems in walking about	I have no problems washing or dressing myself	I have slight problems doing my usual activities	I have severe pain or discomfort	I am not anxious or depressed	55		I have moderate problems in walking about	I have no problems washing or dressing myself	I have severe problems doing my usual activities	I have no pain or discomfort	I am not anxious or depressed	50	143	74	50	5.5	18.3		I have moderate problems in walking about	I have no problems washing or dressing myself	I have no problems doing my usual activities	I have no pain or discomfort	I am not anxious or depressed	52	155	81	50	5.5	18.3
Male	30	not working	Single	Secondary	Non smoker	No	No exercise	Low	Diabetes mellitus, Hepatitis	26.2	180	70	8	8	no	I have slight problems in walking about	I have no problems washing or dressing myself	I have severe problems doing my usual activities	I have slight pain or discomfort	I am slightly anxious or depressed	60		I have no problems in walking about	I have no problems washing or dressing myself	I have no problems doing my usual activities	I have no pain or discomfort	I am not anxious or depressed	55	171	86	64	5.1	26.7		I have moderate problems in walking about	I have no problems washing or dressing myself	I have no problems doing my usual activities	I have no pain or discomfort	I am not anxious or depressed	65	187	80	65	5.1	27.1
Male	53	Retired	Married	Higher secondary	Non smoker	No	No exercise	Low	Hepatitis	20	160	100	72	36	no	I have slight problems in walking about	I have no problems washing or dressing myself	I have moderate problems doing my usual activities	I have severe pain or discomfort	I am slightly anxious or depressed	70		I have slight problems in walking about	I have no problems washing or dressing myself	I have slight problems doing my usual activities	I have slight pain or discomfort	I am slightly anxious or depressed	73	170	96	46	5.4	17.4		I have moderate problems in walking about	I have slight problems washing or dressing myself	I have slight problems doing my usual activities	I have slight pain or discomfort	I am slightly anxious or depressed	75	155	98	45	5.4	17
Female	34		Married	Middle	Non smoker	No	No exercise	Low	Hepatitis	17.1	150	95	102	102	no	I have slight problems in walking about	I have no problems washing or dressing myself	I have moderate problems doing my usual activities	I have moderate pain or discomfort	I am extremely anxious or depressed	65		I have moderate problems in walking about	I have slight problems washing or dressing myself	I have moderate problems doing my usual activities	I have slight pain or discomfort	I am slightly anxious or depressed	78	160	87	47	5.5	17.2		I have moderate problems in walking about	I have slight problems washing or dressing myself	I have slight problems doing my usual activities	I have slight pain or discomfort	I am slightly anxious or depressed	68	148	95	47	5.5	17.2
Male	70	Not capable of working	Married	Not educated	Ex-smoker	No	No exercise	Normal	Hepatitis	23.4	180	90	18	8	no	I have severe problems in walking about	I have no problems washing or dressing myself	I have severe problems doing my usual activities	I have severe pain or discomfort	I am not anxious or depressed	40		I have moderate problems in walking about	I have slight problems washing or dressing myself	I have moderate problems doing my usual activities	I have slight pain or discomfort	I am slightly anxious or depressed	45	150	80	71	5.8	23.8		I have moderate problems in walking about	I have moderate problems washing or dressing myself	I have slight problems doing my usual activities	I have slight pain or discomfort	I am slightly anxious or depressed	44	170	90	72	5.8	24.1
Female	60		Married	Secondary	Non smoker	No	Daily	Low	Not any	19	180	80	48	30	no	I have moderate problems in walking about	I have no problems washing or dressing myself	I have severe problems doing my usual activities	I have slight pain or discomfort	I am extremely anxious or depressed	50		I have moderate problems in walking about	I have no problems washing or dressing myself	I have severe problems doing my usual activities	I have slight pain or discomfort	I am slightly anxious or depressed	55	185	90	43	5	18.5		I have severe problems in walking about	I have moderate problems washing or dressing myself	I have slight problems doing my usual activities	I have slight pain or discomfort	I am slightly anxious or depressed	52	175	80	43	5	18.5
Female	60	Not capable of working	Married	Secondary	Non smoker	No	Some times	Low	Diabetes mellitus	24.1	150	70	48	18	yes	I have severe problems in walking about	I have slight problems washing or dressing myself	I am unable to do my usual activities	I have severe pain or discomfort	I am extremely anxious or depressed	30		I have no problems in walking about	I have no problems washing or dressing myself	I have no problems doing my usual activities	I have slight pain or discomfort	I am slightly anxious or depressed	33	150	78	77	5.11	23.7		I have severe problems in walking about	I have severe problems washing or dressing myself	I have slight problems doing my usual activities	I have slight pain or discomfort	I am slightly anxious or depressed	35	140	70	77	5.11	23.7
Male	53	Doing a job	Married	Middle	Ex-smoker	No	No exercise	Low	Not any	20.7	150	90	120	24	yes	I have moderate problems in walking about	I have no problems washing or dressing myself	I have no problems doing my usual activities	I have moderate pain or discomfort	I am slightly anxious or depressed	60		I have no problems in walking about	I have no problems washing or dressing myself	I have no problems doing my usual activities	I have slight pain or discomfort	I am slightly anxious or depressed	65	160	80	63	5.8	21.1		I am unable to walk about	I have severe problems washing or dressing myself	I have slight problems doing my usual activities	I have slight pain or discomfort	I am slightly anxious or depressed	60	148	88	64	5.8	21.5
Female	27	Not capable of working	Single	Graduate	Non smoker	No	No exercise	Normal	Not any	19.1	180	120	168	18	yes	I have no problems in walking about	I have no problems washing or dressing myself	I have slight problems doing my usual activities	I have no pain or discomfort	I am not anxious or depressed	85		I have no problems in walking about	I have no problems washing or dressing myself	I have no problems doing my usual activities	I have slight pain or discomfort	I am slightly anxious or depressed	80	190	100	48	5.3	18.7		I have slight problems in walking about	I have no problems washing or dressing myself	I have slight problems doing my usual activities	I have slight pain or discomfort	I am slightly anxious or depressed	88	170	111	49	5.3	19.1
Female	50	Not capable of working	Married	Not educated	Non smoker	No	No exercise	Normal	Not any	24.3	140	90	18	18	no	I have no problems in walking about	I have no problems washing or dressing myself	I have slight problems doing my usual activities	I have slight pain or discomfort	I am extremely anxious or depressed	70		I have slight problems in walking about	I have no problems washing or dressing myself	I have slight problems doing my usual activities	I have slight pain or discomfort	I am slightly anxious or depressed	65	165	95	59	5.2	23.8		I have slight problems in walking about	I have no problems washing or dressing myself	I have slight problems doing my usual activities	I have slight pain or discomfort	I am slightly anxious or depressed	70	138	89	58	5.2	23.4
Male	66	Retired	Married	Secondary	Ex-smoker	No	Daily	Normal	Not any	31.4	162	94	72	60	no	I have moderate problems in walking about	I have no problems washing or dressing myself	I have moderate problems doing my usual activities	I have moderate pain or discomfort	I am slightly anxious or depressed	45		I have moderate problems in walking about	I have no problems washing or dressing myself	I have moderate problems doing my usual activities	I have moderate pain or discomfort	I am slightly anxious or depressed	50	150	80	93	5.8	31.2		I have slight problems in walking about	I have no problems washing or dressing myself	I have slight problems doing my usual activities	I have slight pain or discomfort	I am slightly anxious or depressed	47	160	90	92	5.8	30.8
Male	40	Not capable of working	Married	Not educated	Non smoker	No	Daily	Low	Not any	28.7	161	79	24	12	no	I have no problems in walking about	I have no problems washing or dressing myself	I have slight problems doing my usual activities	I have no pain or discomfort	I am not anxious or depressed	80		I have severe problems in walking about	I have no problems washing or dressing myself	I have moderate problems doing my usual activities	I have moderate pain or discomfort	I am slightly anxious or depressed	78	170	88	82	5.7	28.3		I have moderate problems in walking about	I have no problems washing or dressing myself	I have slight problems doing my usual activities	I have slight pain or discomfort	I am slightly anxious or depressed	80	155	80	82	5.7	28.3
Female	65	Not capable of working	Married	Primary	Non smoker	No	Some times	Normal	Cardio vascular disease, Diabetes mellitus	25.9	199	74	48	24	no	I have severe problems in walking about	I have severe problems washing or dressing myself	I am unable to do my usual activities	I have moderate pain or discomfort	I am moderately anxious or depressed	40		I have severe problems in walking about	I have slight problems washing or dressing myself	I have severe problems doing my usual activities	I have moderate pain or discomfort	I am slightly anxious or depressed	45	180	70	53.7	4.7	27.5		I have slight problems in walking about	I have no problems washing or dressing myself	I have slight problems doing my usual activities	I have slight pain or discomfort	I am slightly anxious or depressed	42	190	75	54	4.7	27.7
Female	75	Retired	Married	Middle	Ex-smoker	No	No exercise	Low	not any	26.2	170	63	24	24	no	I have moderate problems in walking about	I have no problems washing or dressing myself	I have slight problems doing my usual activities	I have slight pain or discomfort	I am not anxious or depressed	90		I have severe problems in walking about	I have slight problems washing or dressing myself	I have severe problems doing my usual activities	I have moderate pain or discomfort	I am slightly anxious or depressed	90	150	69	74.6	5.6	26.5		I have no problems in walking about	I have no problems washing or dressing myself	I have slight problems doing my usual activities	I have slight pain or discomfort	I am slightly anxious or depressed	90	168	65	75	5.6	26.7
Male	42	Not capable of working	Married	Middle	Smoker	No	No exercise	Low	Not any	20.8	158	98	48	36	yes	I have severe problems in walking about	I have moderate problems washing or dressing myself	I have no problems doing my usual activities	I have moderate pain or discomfort	I am moderately anxious or depressed	70		I have slight problems in walking about	I have no problems washing or dressing myself	I have severe problems doing my usual activities	I have moderate pain or discomfort	I am slightly anxious or depressed	75	170	100	61	5.7	21.1		I have no problems in walking about	I have no problems washing or dressing myself	I have slight problems doing my usual activities	I have slight pain or discomfort	I am slightly anxious or depressed	72	155	95	61	5.7	21.1
Female	45	Not capable of working	Married	Not educated	Non smoker	No	Some times	Low	Diabetes mellitus	29.8	154	69	120	12	no	I have slight problems in walking about	I have no problems washing or dressing myself	I have no problems doing my usual activities	I have slight pain or discomfort	I am not anxious or depressed	70		I have slight problems in walking about	I have no problems washing or dressing myself	I have severe problems doing my usual activities	I have moderate pain or discomfort	I am slightly anxious or depressed	70	157	73	60	4.8	29.8		I have slight problems in walking about	I have no problems washing or dressing myself	I have slight problems doing my usual activities	I have slight pain or discomfort	I am slightly anxious or depressed	70	150	70	59	4.8	29.2
Female	60	Not capable of working	Married	Not educated	Non smoker	No	No exercise	Low	Respiratory disorder	19.5	170	90	48	48	no	I have severe problems in walking about	I have moderate problems washing or dressing myself	I have severe problems doing my usual activities	I have severe pain or discomfort	I am extremely anxious or depressed	30		I have severe problems in walking about	I have slight problems washing or dressing myself	I have severe problems doing my usual activities	I have moderate pain or discomfort	I am slightly anxious or depressed	30	160	87	45	5	19.5		I have slight problems in walking about	I have no problems washing or dressing myself	I have slight problems doing my usual activities	I have slight pain or discomfort	I am slightly anxious or depressed	33	164	89	45	5	19.4
Female	61	Not capable of working	Married	Not educated	Non smoker	No	Daily	Low	Not any	36.7	140	80	18	18	yes	I have moderate problems in walking about	I have no problems washing or dressing myself	I have moderate problems doing my usual activities	I have severe pain or discomfort	I am not anxious or depressed	60		I have slight problems in walking about	I have no problems washing or dressing myself	I have severe problems doing my usual activities	I have moderate pain or discomfort	I am slightly anxious or depressed	60	150	80	74	4.8	36.7		I have slight problems in walking about	I have no problems washing or dressing myself	I have slight problems doing my usual activities	I have slight pain or discomfort	I am slightly anxious or depressed	62	139	80	73	4.8	36.1
Female	60	Not capable of working	Married	Not educated	Non smoker	No	No exercise	Low	Cardio vascular disease, Diabetes mellitus, Hepatitis	24.3	190	90	120	18	yes	I am unable to walk about	I am unable to wash or dress myself	I am unable to do my usual activities	I have slight pain or discomfort	I am extremely anxious or depressed	30		I have severe problems in walking about	I have no problems washing or dressing myself	I have no problems doing my usual activities	I have moderate pain or discomfort	I am slightly anxious or depressed	40	167	82	59.8	5.2	24.1		I have moderate problems in walking about	I have no problems washing or dressing myself	I have slight problems doing my usual activities	I have slight pain or discomfort	I am slightly anxious or depressed	35	180	88	59	5.2	23.8
Female	55	Not capable of working	Married	Not educated	Non smoker	No	No exercise	Normal	Diabetes mellitus, Hepatitis	20.9	150	90	48	6	no	I am unable to walk about	I am unable to wash or dress myself	I am unable to do my usual activities	I have slight pain or discomfort	I am not anxious or depressed	50		I have no problems in walking about	I have no problems washing or dressing myself	I am unable to do my usual activities	I have moderate pain or discomfort	I am slightly anxious or depressed	45	163	80	44	4.9	20.9		I have moderate problems in walking about	I have no problems washing or dressing myself	I have slight problems doing my usual activities	I have slight pain or discomfort	I am slightly anxious or depressed	53	148	87	44	4.9	20.9
Female	50	Not capable of working	Married	Primary	Non smoker	No	Daily	Low	Diabetes mellitus, Hepatitis	32.5	180	90	120	6	yes	I have slight problems in walking about	I have no problems washing or dressing myself	I have moderate problems doing my usual activities	I have slight pain or discomfort	I am moderately anxious or depressed	60		I have slight problems in walking about	I have no problems washing or dressing myself	I have slight problems doing my usual activities	I have severe pain or discomfort	I am slightly anxious or depressed	57	190	98	76	5	32.7		I have no problems in walking about	I have no problems washing or dressing myself	I have slight problems doing my usual activities	I have slight pain or discomfort	I am slightly anxious or depressed	62	176	89	76	5	32.7
Male	60	Not capable of working	Married	Not educated	Ex-smoker	No	No exercise	Low	Diabetes mellitus, Hepatitis	21.2	180	90	36	18	no	I am unable to walk about	I am unable to wash or dress myself	I am unable to do my usual activities	I have severe pain or discomfort	I am not anxious or depressed	60		I have moderate problems in walking about	I have no problems washing or dressing myself	I have slight problems doing my usual activities	I have severe pain or discomfort	I am slightly anxious or depressed	65	190	105	51	5.1	21.2		I have no problems in walking about	I have no problems washing or dressing myself	I have slight problems doing my usual activities	I have slight pain or discomfort	I am slightly anxious or depressed	66	170	86	51	5.1	21.2
Female	37	Doing a job	Married	Secondary	Ex-smoker	No	No exercise	Low	Not any	17.7	172	95	36	24	no	I have no problems in walking about	I have no problems washing or dressing myself	I have slight problems doing my usual activities	I have slight pain or discomfort	I am moderately anxious or depressed	50		I have moderate problems in walking about	I have slight problems washing or dressing myself	I have moderate problems doing my usual activities	I have severe pain or discomfort	I am slightly anxious or depressed	55	160	90	48.3	5.4	18.3		I have no problems in walking about	I have no problems washing or dressing myself	I have slight problems doing my usual activities	I have slight pain or discomfort	I am slightly anxious or depressed	54	168	94	49	5.4	18.5
Male	37	Doing a job	Married	Not educated	Ex-smoker	No	Daily	Normal	Not any	19.7	180	60	1	12	no	I have no problems in walking about	I have no problems washing or dressing myself	I have no problems doing my usual activities	I have slight pain or discomfort	I am not anxious or depressed	70		I have slight problems in walking about	I have no problems washing or dressing myself	I have moderate problems doing my usual activities	I have severe pain or discomfort	I am slightly anxious or depressed	65	178	75	64	5.11	19.7		I have no problems in walking about	I have no problems washing or dressing myself	I have slight problems doing my usual activities	I have slight pain or discomfort	I am slightly anxious or depressed	70	171	70	64	5.11	19.7
Female	61	Not capable of working	Married	Secondary	Non smoker	No	No exercise	Low	Diabetes mellitus	16.5	190	74	120	18	no	I have moderate problems in walking about	I have slight problems washing or dressing myself	I have severe problems doing my usual activities	I have slight pain or discomfort	I am moderately anxious or depressed	60		I have slight problems in walking about	I have no problems washing or dressing myself	I have moderate problems doing my usual activities	I have severe pain or discomfort	I am slightly anxious or depressed	60	200	100	45	5.5	16.5		I have slight problems in walking about	I have no problems washing or dressing myself	I have slight problems doing my usual activities	I have slight pain or discomfort	I am slightly anxious or depressed	63	180	75	46	5.5	16.9
Female	50	Not capable of working	Married	Secondary	Non smoker	No	No exercise	Low	Not any	24.2	153	67	24	12	no	I have moderate problems in walking about	I have severe problems washing or dressing myself	I am unable to do my usual activities	I have moderate pain or discomfort	I am moderately anxious or depressed	40		I have moderate problems in walking about	I have moderate problems washing or dressing myself	I have severe problems doing my usual activities	I have severe pain or discomfort	I am slightly anxious or depressed	45	140	80	55	5	23.7		I have moderate problems in walking about	I have no problems washing or dressing myself	I have slight problems doing my usual activities	I have slight pain or discomfort	I am slightly anxious or depressed	42	150	70	54	5	23.3
Female	25	Doing a job	Single	Graduate	Non smoker	No	Daily	Normal	Not any	21.2	140	80	12	12	no	I have slight problems in walking about	I have no problems washing or dressing myself	I have no problems doing my usual activities	I have no pain or discomfort	I am not anxious or depressed	90		I have severe problems in walking about	I have moderate problems washing or dressing myself	I have severe problems doing my usual activities	I have severe pain or discomfort	I am slightly anxious or depressed	90	159	96	51	5.1	21.2		I have moderate problems in walking about	I have no problems washing or dressing myself	I have slight problems doing my usual activities	I have slight pain or discomfort	I am slightly anxious or depressed	90	139	81	50	5.1	20.8
Male	29	Doing a job	Single	Secondary	Non smoker	No	Daily	Low	Hepatitis	20.1	180	107	36	24	no	I have no problems in walking about	I have no problems washing or dressing myself	I have no problems doing my usual activities	I have moderate pain or discomfort	I am slightly anxious or depressed	70		I have no problems in walking about	I have no problems washing or dressing myself	I have no problems doing my usual activities	I have severe pain or discomfort	I am slightly anxious or depressed	65	158	80	57.6	5.7	19.9		I have severe problems in walking about	I have no problems washing or dressing myself	I have slight problems doing my usual activities	I have slight pain or discomfort	I am slightly anxious or depressed	70	176	100	57	5.7	19.7
Female	37	Not capable of working	Married	Primary	Non smoker	No	Some times	Low	Not any	32.9	140	103	12	1	no	I have no problems in walking about	I have no problems washing or dressing myself	I have no problems doing my usual activities	I have no pain or discomfort	I am not anxious or depressed	95		I have severe problems in walking about	I have slight problems washing or dressing myself	I am unable to do my usual activities	I have severe pain or discomfort	I am slightly anxious or depressed	95	168	100	76	5	32.9		I have severe problems in walking about	I have no problems washing or dressing myself	I have slight problems doing my usual activities	I have slight pain or discomfort	I am slightly anxious or depressed	95	138	90	76	5	32.9
Male	53	Retired	Married	Secondary	Ex-smoker	No	No exercise	Normal	Diabetes mellitus, Hepatitis	22.4	150	90	24	12	no	I have severe problems in walking about	I have moderate problems washing or dressing myself	I am unable to do my usual activities	I have severe pain or discomfort	I am moderately anxious or depressed	50		I have severe problems in walking about	I have severe problems washing or dressing myself	I am unable to do my usual activities	I have severe pain or discomfort	I am slightly anxious or depressed	55	155	90	76	6	22.7		I have severe problems in walking about	I have no problems washing or dressing myself	I have moderate problems doing my usual activities	I have slight pain or discomfort	I am slightly anxious or depressed	54	145	88	76	6	22.7
Male	50	Not capable of working	Married	Middle	Ex-smoker	No	Daily	Low	Paralysis	19	200	100	120	18	yes	I have moderate problems in walking about	I have moderate problems washing or dressing myself	I am unable to do my usual activities	I have severe pain or discomfort	I am not anxious or depressed	50		I have severe problems in walking about	I have no problems washing or dressing myself	I am unable to do my usual activities	I have severe pain or discomfort	I am slightly anxious or depressed	55	170	76	51	5.7	18.3		I have severe problems in walking about	I am unable to wash or dress myself	I have moderate problems doing my usual activities	I have slight pain or discomfort	I am slightly anxious or depressed	52	190	96	52	5.7	18
Male	63	Not capable of working	Married	Higher secondary	Ex-smoker	No	No exercise	Normal	Diabetes mellitus	23.3	180	90	60	60	no	I have moderate problems in walking about	I have no problems washing or dressing myself	I have severe problems doing my usual activities	I have moderate pain or discomfort	I am not anxious or depressed	60		I am unable to walk about	I have no problems washing or dressing myself	I am unable to do my usual activities	I have severe pain or discomfort	I am slightly anxious or depressed	60	187	98	77	6	23		I am unable to walk about	I am unable to wash or dress myself	I have moderate problems doing my usual activities	I have slight pain or discomfort	I am slightly anxious or depressed	65	171	87	76	6	22.7
Female	40	Not capable of working	Married	Not educated	Non smoker	No	Daily	Low	Not any	18.6	140	85	18	18	no	I have severe problems in walking about	I have moderate problems washing or dressing myself	I am unable to do my usual activities	I have severe pain or discomfort	I am slightly anxious or depressed	70		I am unable to walk about	I have no problems washing or dressing myself	I am unable to do my usual activities	I have severe pain or discomfort	I am slightly anxious or depressed	75	170	93	43	5	18.6		I am unable to walk about	I am unable to wash or dress myself	I have moderate problems doing my usual activities	I have slight pain or discomfort	I am moderately anxious or depressed	73	136	83	43	5	18.6
Female	37	Not capable of working	Married	Primary	Non smoker	No	Some times	Low	Not any	32.9	140	103	12	1	no	I have no problems in walking about	I have no problems washing or dressing myself	I have no problems doing my usual activities	I have no pain or discomfort	I am not anxious or depressed	95		I have slight problems in walking about	I have no problems washing or dressing myself	I have slight problems doing my usual activities	I have slight pain or discomfort	I am moderately anxious or depressed	95	148	90	76	5	32.9		I am unable to walk about	I am unable to wash or dress myself	I have moderate problems doing my usual activities	I have slight pain or discomfort	I am moderately anxious or depressed	95	138	100	77	5	33.2
Male	69	Retired	Married	Graduate	Ex-smoker	No	Some times	Normal	Hepatitis	19.9	140	90	96	96	no	I have moderate problems in walking about	I have no problems washing or dressing myself	I have slight problems doing my usual activities	I have moderate pain or discomfort	I am extremely anxious or depressed	60		I have moderate problems in walking about	I have no problems washing or dressing myself	I have slight problems doing my usual activities	I have slight pain or discomfort	I am moderately anxious or depressed	55	145	80	62	5.9	20.2		I am unable to walk about	I am unable to wash or dress myself	I have moderate problems doing my usual activities	I have slight pain or discomfort	I am moderately anxious or depressed	62	137	87	63	5.9	20.5
Male	44	Doing a job	Married	Middle	Non smoker	No	Some times	Normal	Not any	18.7	185	91	24	60	yes	I have moderate problems in walking about	I have no problems washing or dressing myself	I have no problems doing my usual activities	I have slight pain or discomfort	I am slightly anxious or depressed	50		I have no problems in walking about	I have no problems washing or dressing myself	I have slight problems doing my usual activities	I have slight pain or discomfort	I am moderately anxious or depressed	55	160	85	64	6.1	18.7		I have moderate problems in walking about	I have slight problems washing or dressing myself	I have moderate problems doing my usual activities	I have slight pain or discomfort	I am moderately anxious or depressed	60	180	90	64	6.1	18.7
Male	52	Doing a job	Married	Graduate	Non smoker	No	No exercise	Low	Not any	41.8	222	86	60	60	no	I have severe problems in walking about	I have slight problems washing or dressing myself	I have moderate problems doing my usual activities	I have moderate pain or discomfort	I am not anxious or depressed	40		I have slight problems in walking about	I have no problems washing or dressing myself	I have no problems doing my usual activities	I have slight pain or discomfort	I am moderately anxious or depressed	45	185	97	124	5.8	41.6		I have moderate problems in walking about	I have moderate problems washing or dressing myself	I have moderate problems doing my usual activities	I have slight pain or discomfort	I am moderately anxious or depressed	48	200	84	122	5.8	40.9
Male	63	Retired	Married	Secondary	Non smoker	No	Daily	Normal	Not any	22.2	170	90	120	96	no	I have moderate problems in walking about	I have no problems washing or dressing myself	I have no problems doing my usual activities	I have moderate pain or discomfort	I am slightly anxious or depressed	50		I have slight problems in walking about	I have no problems washing or dressing myself	I have no problems doing my usual activities	I have slight pain or discomfort	I am moderately anxious or depressed	45	180	100	69	5.9	22.5		I have severe problems in walking about	I have moderate problems washing or dressing myself	I have moderate problems doing my usual activities	I have slight pain or discomfort	I am moderately anxious or depressed	55	165	86	70	5.9	22.8
Female	31	Not capable of working	Married	Secondary	Non smoker	No	No exercise	Normal	Not any	17.4	160	90	120	120	yes	I have moderate problems in walking about	I have no problems washing or dressing myself	I have moderate problems doing my usual activities	I have moderate pain or discomfort	I am not anxious or depressed	60		I have slight problems in walking about	I have no problems washing or dressing myself	I have no problems doing my usual activities	I have slight pain or discomfort	I am moderately anxious or depressed	55	160	85	43	5.2	17.4		I have severe problems in walking about	I have severe problems washing or dressing myself	I have moderate problems doing my usual activities	I have slight pain or discomfort	I am moderately anxious or depressed	60	155	88	42	5.2	16.9
Male	75	Not capable of working	Married	Middle	Non smoker	No	No exercise	Normal	Cardio vascular disease, Diabetes mellitus	30.5	140	80	180	30	yes	I have severe problems in walking about	I am unable to wash or dress myself	I have severe problems doing my usual activities	I have severe pain or discomfort	I am extremely anxious or depressed	40		I have slight problems in walking about	I have no problems washing or dressing myself	I have no problems doing my usual activities	I have slight pain or discomfort	I am moderately anxious or depressed	50	155	90	77.7	5.3	30.3		I have slight problems in walking about	I have no problems washing or dressing myself	I have moderate problems doing my usual activities	I have slight pain or discomfort	I am moderately anxious or depressed	45	140	80	77	5.3	30.1
Male	22	Doing a job	Single	Secondary	Non smoker	No	No exercise	Low	Not any	20.7	140	70	24	3	no	I have no problems in walking about	I have no problems washing or dressing myself	I have no problems doing my usual activities	I have moderate pain or discomfort	I am not anxious or depressed	90		I have no problems in walking about	I have no problems washing or dressing myself	I have no problems doing my usual activities	I have slight pain or discomfort	I am moderately anxious or depressed	87	158	78	54	5.3	21.1		I have slight problems in walking about	I have no problems washing or dressing myself	I have moderate problems doing my usual activities	I have slight pain or discomfort	I am moderately anxious or depressed	90	138	70	54	5.3	21.1
Female	64	Not capable of working	Married	Higher secondary	Non smoker	No	No exercise	Low	Diabetes mellitus	26.3	188	90	180	3	no	I am unable to walk about	I am unable to wash or dress myself	I am unable to do my usual activities	I have severe pain or discomfort	I am slightly anxious or depressed	40		I have no problems in walking about	I have no problems washing or dressing myself	I have no problems doing my usual activities	I have slight pain or discomfort	I am moderately anxious or depressed	45	190	100	70	5.4	26.3		I have slight problems in walking about	I have no problems washing or dressing myself	I have moderate problems doing my usual activities	I have moderate pain or discomfort	I am moderately anxious or depressed	46	182	89	70	5.4	26.3
Female	62	Not capable of working	Married	Not educated	Non smoker	No	No exercise	Normal	Not any	17.3	188	85	120	3	no	I have severe problems in walking about	I have slight problems washing or dressing myself	I have severe problems doing my usual activities	I have severe pain or discomfort	I am moderately anxious or depressed	30		I have moderate problems in walking about	I have no problems washing or dressing myself	I have slight problems doing my usual activities	I have slight pain or discomfort	I am moderately anxious or depressed	45	195	90	45.5	5.4	17.2		I have moderate problems in walking about	I have no problems washing or dressing myself	I have moderate problems doing my usual activities	I have moderate pain or discomfort	I am moderately anxious or depressed	40	185	85	45	5.4	17
Male	35	Doing a job	Married	Middle	Non smoker	No	Daily	Low	Hepatitis	20.7	180	90	3	3	no	I have severe problems in walking about	I have slight problems washing or dressing myself	I have severe problems doing my usual activities	I have slight pain or discomfort	I am not anxious or depressed	40		I have severe problems in walking about	I have no problems washing or dressing myself	I have slight problems doing my usual activities	I have moderate pain or discomfort	I am moderately anxious or depressed	36	160	75	54	5.3	21.1		I have severe problems in walking about	I have no problems washing or dressing myself	I have moderate problems doing my usual activities	I have moderate pain or discomfort	I am moderately anxious or depressed	44	176	87	55	5.3	21.5
Male	39	Not capable of working	Married	Graduate	Non smoker	No	No exercise	Low	Hepatitis, TB	17.3	150	80	48	12	no	I have severe problems in walking about	I have slight problems washing or dressing myself	I have severe problems doing my usual activities	I have severe pain or discomfort	I am moderately anxious or depressed	50		I have moderate problems in walking about	I have slight problems washing or dressing myself	I have moderate problems doing my usual activities	I have moderate pain or discomfort	I am moderately anxious or depressed	55	155	80	50	5.7	17.3		I have severe problems in walking about	I have no problems washing or dressing myself	I have moderate problems doing my usual activities	I have moderate pain or discomfort	I am moderately anxious or depressed	56	147	80	50	5.7	17.3
Female	60	Not capable of working	Married	Not educated	Non smoker	No	No exercise	Normal	Hepatitis	17.5	150	80	84	60	no	I have severe problems in walking about	I have moderate problems washing or dressing myself	I have moderate problems doing my usual activities	I have severe pain or discomfort	I am moderately anxious or depressed	40		I have moderate problems in walking about	I have slight problems washing or dressing myself	I have moderate problems doing my usual activities	I have moderate pain or discomfort	I am moderately anxious or depressed	45	160	88	42	5.1	17.5		I have no problems in walking about	I have no problems washing or dressing myself	I have moderate problems doing my usual activities	I have moderate pain or discomfort	I am moderately anxious or depressed	48	149	80	43	5.1	17.9
Male	20	Not capable of working	Single	Secondary	Non smoker	No	Daily	Low	Hepatitis	22.5	130	80	48	48	no	I have severe problems in walking about	I have no problems washing or dressing myself	I have severe problems doing my usual activities	I have moderate pain or discomfort	I am moderately anxious or depressed	40		I have severe problems in walking about	I have moderate problems washing or dressing myself	I have moderate problems doing my usual activities	I have moderate pain or discomfort	I am moderately anxious or depressed	50	140	82	54.5	5.1	22.7		I have no problems in walking about	I have no problems washing or dressing myself	I have moderate problems doing my usual activities	I have moderate pain or discomfort	I am moderately anxious or depressed	45	130	80	55	5.1	22.9
Male	32	Not capable of working	Married	Middle	Non smoker	No	Daily	Normal	Not any	18.5	190	80	24	24	no	I have no problems in walking about	I have no problems washing or dressing myself	I have severe problems doing my usual activities	I have no pain or discomfort	I am not anxious or depressed	60		I have slight problems in walking about	I have no problems washing or dressing myself	I have moderate problems doing my usual activities	I have moderate pain or discomfort	I am moderately anxious or depressed	60	167	68	52	5.6	18.5		I have no problems in walking about	I have no problems washing or dressing myself	I have moderate problems doing my usual activities	I have moderate pain or discomfort	I am moderately anxious or depressed	60	187	80	51	5.6	18.1
Female	35	Not capable of working	Married	Secondary	Non smoker	No	No exercise		Not any	21.1	150	90	180	24	no	I have severe problems in walking about	I have no problems washing or dressing myself	I have severe problems doing my usual activities	I have slight pain or discomfort	I am not anxious or depressed	70		I have moderate problems in walking about	I have no problems washing or dressing myself	I have moderate problems doing my usual activities	I have moderate pain or discomfort	I am moderately anxious or depressed	70	160	95	49	5	21.1		I have no problems in walking about	I have no problems washing or dressing myself	I have moderate problems doing my usual activities	I have moderate pain or discomfort	I am moderately anxious or depressed	70	148	88	49	5	21.1
Male	31	Doing a job	Single	Secondary	Ex-smoker	No	Daily	Low	Hepatitis	22.8	169	90	48	24	yes	I have slight problems in walking about	I have no problems washing or dressing myself	I have no problems doing my usual activities	I have moderate pain or discomfort	I am moderately anxious or depressed	50		I have moderate problems in walking about	I have severe problems washing or dressing myself	I have severe problems doing my usual activities	I have moderate pain or discomfort	I am moderately anxious or depressed	55	170	90	66	5.7	22.8		I have slight problems in walking about	I have no problems washing or dressing myself	I have moderate problems doing my usual activities	I have moderate pain or discomfort	I am moderately anxious or depressed	59	165	87	65.5	5.7	22.8
Male	50	Retired	Married	Secondary	Ex-smoker	No	Some times	Low	Hepatitis	22.4	160	70	60	36	no	I have severe problems in walking about	I have severe problems washing or dressing myself	I have moderate problems doing my usual activities	I have slight pain or discomfort	I am not anxious or depressed	60		I have slight problems in walking about	I have no problems washing or dressing myself	I have severe problems doing my usual activities	I have moderate pain or discomfort	I am moderately anxious or depressed	60	145	60	63	5.6	22.4		I have slight problems in walking about	I have no problems washing or dressing myself	I have moderate problems doing my usual activities	I have moderate pain or discomfort	I am moderately anxious or depressed	60	156	70	63	5.6	22.4
Female	48	Housewife	Married	Not educated	Non smoker	No	Daily	Low	Diabetes mellitus, Hepatitis	24.6	140	70	24	12	no	I have moderate problems in walking about	I have moderate problems washing or dressing myself	I have moderate problems doing my usual activities	I have severe pain or discomfort	I am extremely anxious or depressed	60		I have moderate problems in walking about	I have no problems washing or dressing myself	I have severe problems doing my usual activities	I have moderate pain or discomfort	I am moderately anxious or depressed	63	157	78	59	5.1	24.6		I have moderate problems in walking about	I have no problems washing or dressing myself	I have moderate problems doing my usual activities	I have moderate pain or discomfort	I am moderately anxious or depressed	66	137	70	59	5.1	25
Female	35	Not capable of working	Married	Not educated	Non smoker	No	No exercise	Normal	Not any	28.6	159	101	72	48	yes	I have no problems in walking about	I have no problems washing or dressing myself	I have slight problems doing my usual activities	I have slight pain or discomfort	I am not anxious or depressed	90		I have slight problems in walking about	I have no problems washing or dressing myself	I have no problems doing my usual activities	I have moderate pain or discomfort	I am moderately anxious or depressed	90	140	80	59	4.9	28.1		I have moderate problems in walking about	I have no problems washing or dressing myself	I have moderate problems doing my usual activities	I have moderate pain or discomfort	I am moderately anxious or depressed	90	155	98	58	4.9	25
Female	47	Housewife	Married	Not educated	Non smoker	No	No exercise	Low	Not any	22.7	140	70	180	24	no	I have severe problems in walking about	I have moderate problems washing or dressing myself	I am unable to do my usual activities	I have severe pain or discomfort	I am moderately anxious or depressed	40		I have slight problems in walking about	I have no problems washing or dressing myself	I have no problems doing my usual activities	I have moderate pain or discomfort	I am moderately anxious or depressed	45	160	90	46	4.8	22.7		I have severe problems in walking about	I have no problems washing or dressing myself	I have moderate problems doing my usual activities	I have moderate pain or discomfort	I am moderately anxious or depressed	50	138	70	46	4.8	22.7
Male	43	Private business	Married	Secondary	Non smoker	No	No exercise	Low	Not any	20.2	175	93	36	6	yes	I have severe problems in walking about	I have no problems washing or dressing myself	I have severe problems doing my usual activities	I have severe pain or discomfort	I am extremely anxious or depressed	50		I have no problems in walking about	I have no problems washing or dressing myself	I have no problems doing my usual activities	I have moderate pain or discomfort	I am moderately anxious or depressed	55	190	11`0	55.7	5.5	20.4		I have no problems in walking about	I have no problems washing or dressing myself	I have moderate problems doing my usual activities	I have moderate pain or discomfort	I am moderately anxious or depressed	57	170	93	56	5.5	20.5
Female	35	No working	Married	Not educated	Non smoker	No	Daily	Low	Not any	23.8	157	73	120	12	yes	I have slight problems in walking about	I have no problems washing or dressing myself	I have no problems doing my usual activities	I have slight pain or discomfort	I am moderately anxious or depressed	60		I have no problems in walking about	I have no problems washing or dressing myself	I am unable to do my usual activities	I have moderate pain or discomfort	I am moderately anxious or depressed	60	167	85	60	5.2	24.2		I have no problems in walking about	I have no problems washing or dressing myself	I have severe problems doing my usual activities	I have moderate pain or discomfort	I am moderately anxious or depressed	65	155	73	60	5.2	24.2
Female	55	Housewife	Married	Middle	Non smoker	No	Some times	Normal	Not any	22.8	150	70	264	12	yes	I have no problems in walking about	I have no problems washing or dressing myself	I have no problems doing my usual activities	I have moderate pain or discomfort	I am not anxious or depressed	80		I have slight problems in walking about	I have no problems washing or dressing myself	I have slight problems doing my usual activities	I have severe pain or discomfort	I am moderately anxious or depressed	80	160	75	63	5.6	22.4		I have no problems in walking about	I have no problems washing or dressing myself	I have severe problems doing my usual activities	I have moderate pain or discomfort	I am moderately anxious or depressed	80	150	70	62	5.6	22.1
Male	59	Not capable of working	Married	Secondary	Non smoker	No	Daily	Normal	Diabetes mellitus	21.8	146	60	300	36	yes	I have moderate problems in walking about	I have slight problems washing or dressing myself	I have moderate problems doing my usual activities	I have slight pain or discomfort	I am slightly anxious or depressed	70		I have slight problems in walking about	I have no problems washing or dressing myself	I have slight problems doing my usual activities	I have severe pain or discomfort	I am moderately anxious or depressed	65	155	70	63	5.7	21.8		I have no problems in walking about	I have no problems washing or dressing myself	I have severe problems doing my usual activities	I have moderate pain or discomfort	I am moderately anxious or depressed	70	146	60	63	5.7	21.8
Male	59	Not capable of working	Married	Secondary	Non smoker	No	Daily	Normal	Diabetes mellitus	21.8	146	60	300	36	yes	I have moderate problems in walking about	I have slight problems washing or dressing myself	I have moderate problems doing my usual activities	I have slight pain or discomfort	I am slightly anxious or depressed	70		I have no problems in walking about	I have no problems washing or dressing myself	I have slight problems doing my usual activities	I have severe pain or discomfort	I am moderately anxious or depressed	65	155	70	63	5.7	21.8		I have no problems in walking about	I have no problems washing or dressing myself	I have severe problems doing my usual activities	I have moderate pain or discomfort	I am moderately anxious or depressed	70	146	60	63	5.7	21.8
Female	32	Not capable of working	Single	Secondary	Non smoker	No	Some times	Normal	Not any	21.8	180	100	12	30	no	I have moderate problems in walking about	I have no problems washing or dressing myself	I have no problems doing my usual activities	I have slight pain or discomfort	I am slightly anxious or depressed	80		I have slight problems in walking about	I have no problems washing or dressing myself	I have moderate problems doing my usual activities	I have severe pain or discomfort	I am moderately anxious or depressed	80	183	103	61.9	5.7	21.4		I have moderate problems in walking about	I have no problems washing or dressing myself	I have severe problems doing my usual activities	I have moderate pain or discomfort	I am moderately anxious or depressed	80	175	97	61	5.7	21.1
Male	36	Not capable of working	Married	Not educated	Non smoker	No	No exercise	Normal	Hepatitis	22.8	150	70	24	24	no	I have moderate problems in walking about	I have slight problems washing or dressing myself	I have severe problems doing my usual activities	I have moderate pain or discomfort	I am moderately anxious or depressed	50		I have slight problems in walking about	I have no problems washing or dressing myself	I have moderate problems doing my usual activities	I have severe pain or discomfort	I am moderately anxious or depressed	55	170	95	66	5.7	22.8		I have moderate problems in walking about	I have no problems washing or dressing myself	I have severe problems doing my usual activities	I have moderate pain or discomfort	I am moderately anxious or depressed	54	147	70	66	5.7	22.8
Male	39	Not capable of working	Married	Not educated	Non smoker	No	No exercise	Low	Not any	18.2	140	80	120	1	no	I have slight problems in walking about	I have no problems washing or dressing myself	I have moderate problems doing my usual activities	I have severe pain or discomfort	I am moderately anxious or depressed	50		I have moderate problems in walking about	I have no problems washing or dressing myself	I have moderate problems doing my usual activities	I have severe pain or discomfort	I am moderately anxious or depressed	60	160	85	48	5.4	18.2		I have moderate problems in walking about	I have no problems washing or dressing myself	I have severe problems doing my usual activities	I have moderate pain or discomfort	I am moderately anxious or depressed	58	140	80	49	5.4	18.5
Male	32	Not capable of working	Married	Secondary	Non smoker	No	Daily	Low	Hepatitis	19.6	175	107	24	24	no	I have moderate problems in walking about	I have no problems washing or dressing myself	I have no problems doing my usual activities	I have severe pain or discomfort	I am not anxious or depressed	65		I have severe problems in walking about	I have moderate problems washing or dressing myself	I have severe problems doing my usual activities	I have severe pain or discomfort	I am moderately anxious or depressed	70	155	90	55	5.6	19.6		I have severe problems in walking about	I have no problems washing or dressing myself	I have severe problems doing my usual activities	I have moderate pain or discomfort	I am moderately anxious or depressed	70	170	103	55	5.6	19.6
Male	45	Not capable of working	Married	Secondary	Non smoker	No	No exercise	Normal	Diabetes mellitus, Hepatitis	26.8	152	71	108	36	no	I am unable to walk about	I have moderate problems washing or dressing myself	I am unable to do my usual activities	I have moderate pain or discomfort	I am not anxious or depressed	30		I have severe problems in walking about	I have severe problems washing or dressing myself	I have severe problems doing my usual activities	I have severe pain or discomfort	I am moderately anxious or depressed	35	173	78	72.4	5.5	26.6		I have no problems in walking about	I have no problems washing or dressing myself	I have severe problems doing my usual activities	I have moderate pain or discomfort	I am moderately anxious or depressed	40	150	71	72	5.5	26.4
Male	45	Not capable of working	Married	Not educated	Non smoker	No	No exercise	Normal	Hepatitis	17.9	157	90	36	12	no	I have severe problems in walking about	I have moderate problems washing or dressing myself	I have severe problems doing my usual activities	I have moderate pain or discomfort	I am not anxious or depressed	50		I have moderate problems in walking about	I have no problems washing or dressing myself	I have severe problems doing my usual activities	I have severe pain or discomfort	I am moderately anxious or depressed	53	164	80	54	5.9	17.6		I have no problems in walking about	I have no problems washing or dressing myself	I have severe problems doing my usual activities	I have moderate pain or discomfort	I am moderately anxious or depressed	58	154	90	54	5.9	17.6
Male	40	Not capable of working	Married	Middle	Smoker	No	Some times	Low	Hepatitis	30.8	200	95	1	1	yes	I have moderate problems in walking about	I have no problems washing or dressing myself	I have no problems doing my usual activities	I have severe pain or discomfort	I am extremely anxious or depressed	45		I have severe problems in walking about	I have no problems washing or dressing myself	I have severe problems doing my usual activities	I have severe pain or discomfort	I am moderately anxious or depressed	50	188	88	74	5.1	30.8		I have severe problems in walking about	I am unable to wash or dress myself	I have severe problems doing my usual activities	I have moderate pain or discomfort	I am moderately anxious or depressed	50	192	93	74	5.1	30.8
Male	72	Not capable of working	Married	Primary	Ex-smoker	No	No exercise	Low	Hepatitis	25.3	153	82	84	36	no	I have severe problems in walking about	I am unable to wash or dress myself	I am unable to do my usual activities	I have severe pain or discomfort	I am extremely anxious or depressed	35		I have severe problems in walking about	I have no problems washing or dressing myself	I have severe problems doing my usual activities	I have severe pain or discomfort	I am moderately anxious or depressed	35	170	80	70.5	5.6	25.1		I have moderate problems in walking about	I have slight problems washing or dressing myself	I have severe problems doing my usual activities	I have moderate pain or discomfort	I am moderately anxious or depressed	39	151	81	70	5.6	24.9
Female	70	Not capable of working	Married	Not educated	Non smoker	No	No exercise	Normal	Hepatitis	20.7	169	77	3	8	no	I have moderate problems in walking about	I have severe problems washing or dressing myself	I have severe problems doing my usual activities	I have extreme pain or discomfort	I am extremely anxious or depressed	30		I have severe problems in walking about	I have no problems washing or dressing myself	I have severe problems doing my usual activities	I have severe pain or discomfort	I am moderately anxious or depressed	35	170	82	53	5.3	20.7		I have no problems in walking about	I have slight problems washing or dressing myself	I have severe problems doing my usual activities	I have moderate pain or discomfort	I am moderately anxious or depressed	40	164	74	53	5.3	20.7
Male	51	Not capable of working	Married	Not educated	Ex-smoker	No	No exercise	Low	Cardio vascular disease	23	148	60	48	1	no	I have moderate problems in walking about	I have moderate problems washing or dressing myself	I have moderate problems doing my usual activities	I have moderate pain or discomfort	I am not anxious or depressed	50		I have moderate problems in walking about	I have no problems washing or dressing myself	I have severe problems doing my usual activities	I have severe pain or discomfort	I am moderately anxious or depressed	55	140	62	76.5	6	22.9		I have slight problems in walking about	I have slight problems washing or dressing myself	I have severe problems doing my usual activities	I have moderate pain or discomfort	I am moderately anxious or depressed	54	147	70	76	6	22.7
Male	58	Private business	Married	Middle	Non smoker	No	No exercise	Low	Diabetes mellitus	24	154	74	36	12	no	I have slight problems in walking about	I have no problems washing or dressing myself	I have slight problems doing my usual activities	I have no pain or discomfort	I am not anxious or depressed	70		I have slight problems in walking about	I have no problems washing or dressing myself	I have no problems doing my usual activities	I have severe pain or discomfort	I am moderately anxious or depressed	80	160	80	87	6.3	24		I have moderate problems in walking about	I have slight problems washing or dressing myself	I have severe problems doing my usual activities	I have moderate pain or discomfort	I am moderately anxious or depressed	75	153	74	87	6.3	24
Female	62	not working	Married	Higher secondary	Non smoker	No	No exercise	Low	Not any	22.1	178	71	24	15	yes	I have severe problems in walking about	I have severe problems washing or dressing myself	I am unable to do my usual activities	I have moderate pain or discomfort	I am severely anxious or depressed	70		I have severe problems in walking about	I have no problems washing or dressing myself	I have no problems doing my usual activities	I have severe pain or discomfort	I am moderately anxious or depressed	70	170	70	53	5.1	22.1		I have severe problems in walking about	I have slight problems washing or dressing myself	I have severe problems doing my usual activities	I have moderate pain or discomfort	I am moderately anxious or depressed	70	175	71	54	5.1	22.5
Female	41	not working	Married	Secondary	Non smoker	No	Some times	Normal	Not any	22.1	150	90	108	60	no	I have moderate problems in walking about	I have slight problems washing or dressing myself	I have slight problems doing my usual activities	I have moderate pain or discomfort	I am moderately anxious or depressed	40		I have no problems in walking about	I have no problems washing or dressing myself	I have no problems doing my usual activities	I have severe pain or discomfort	I am moderately anxious or depressed	50	155	90	52.6	5.1	21.9		I have severe problems in walking about	I have moderate problems washing or dressing myself	I have severe problems doing my usual activities	I have moderate pain or discomfort	I am moderately anxious or depressed	50	148	88	53	5.1	22.1
Male	45	Not capable of working	Married	Primary	Non smoker	No	No exercise	Low	Not any	24.6	150	90	96	96	yes	I have moderate problems in walking about	I have no problems washing or dressing myself	I have slight problems doing my usual activities	I have severe pain or discomfort	I am slightly anxious or depressed	60		I have severe problems in walking about	I have no problems washing or dressing myself	I have no problems doing my usual activities	I have severe pain or discomfort	I am moderately anxious or depressed	65	160	78	60	5.2	24.2		I have severe problems in walking about	I have moderate problems washing or dressing myself	I have severe problems doing my usual activities	I have moderate pain or discomfort	I am moderately anxious or depressed	68	150	90	60	5.2	24.2
Male	53	Not capable of working	Married	Secondary	Smoker	No	No exercise	Normal	Not any	24.9	170	100	144	54	no	I have severe problems in walking about	I have no problems washing or dressing myself	I have severe problems doing my usual activities	I have severe pain or discomfort	I am not anxious or depressed	30		I have severe problems in walking about	I have no problems washing or dressing myself	I have no problems doing my usual activities	I have severe pain or discomfort	I am moderately anxious or depressed	30	170	105	71	5.7	24.5		I have severe problems in walking about	I have severe problems washing or dressing myself	I have severe problems doing my usual activities	I have moderate pain or discomfort	I am moderately anxious or depressed	30	167	100	72	5.7	24.9
Female	45	Not capable of working	Married	Primary	Non smoker	No	No exercise	Low	Not any	30.4	160	100	180	108	yes	I have severe problems in walking about	I have slight problems washing or dressing myself	I have severe problems doing my usual activities	I have extreme pain or discomfort	I am not anxious or depressed	25		I have no problems in walking about	I have no problems washing or dressing myself	I am unable to do my usual activities	I have severe pain or discomfort	I am moderately anxious or depressed	30	150	91	81	5.4	30.7		I have severe problems in walking about	I have severe problems washing or dressing myself	I have severe problems doing my usual activities	I have moderate pain or discomfort	I am extremely anxious or depressed	30	155	95	81	5.4	30.7
Female	37	not working	Married	Secondary	Non smoker	No	Daily	Low	Diabetes mellitus	18.8	150	90	126	2	yes	I have moderate problems in walking about	I have no problems washing or dressing myself	I have severe problems doing my usual activities	I have no pain or discomfort	I am moderately anxious or depressed	50		I am unable to walk about	I have no problems washing or dressing myself	I am unable to do my usual activities	I have severe pain or discomfort	I am moderately anxious or depressed	55	160	90	50	5.4	18.8		I have moderate problems in walking about	I have severe problems washing or dressing myself	I have severe problems doing my usual activities	I have moderate pain or discomfort	I am extremely anxious or depressed	53	147	87	50	5.4	18.8
Female	47	not working	Married	Middle	Non smoker	No	No exercise	Normal	Not any	32.3	145	85	186	18	no	I have no problems in walking about	I have slight problems washing or dressing myself	I have moderate problems doing my usual activities	I have severe pain or discomfort	I am not anxious or depressed	65		I have severe problems in walking about	I have no problems washing or dressing myself	I have severe problems doing my usual activities	I have slight pain or discomfort	I am extremely anxious or depressed	60	147	85	81	5.2	32.7		I am unable to walk about	I have severe problems washing or dressing myself	I have severe problems doing my usual activities	I have moderate pain or discomfort	I am extremely anxious or depressed	68	143	84	82	5.2	33.1
Female	29	not working	Married	Middle	Non smoker	No	No exercise	Normal	Not any	29.8	190	85	36	54	yes	I have no problems in walking about	I have no problems washing or dressing myself	I have no problems doing my usual activities	I have severe pain or discomfort	I am slightly anxious or depressed	85		I have severe problems in walking about	I have no problems washing or dressing myself	I have no problems doing my usual activities	I have slight pain or discomfort	I am extremely anxious or depressed	85	200	85	56	4.5	29.8		I have slight problems in walking about	I have no problems washing or dressing myself	I have severe problems doing my usual activities	I have moderate pain or discomfort	I am extremely anxious or depressed	87	186	84	55	4.5	30.3
Female	44	not working	Married	Middle	Non smoker	No	Some times	Normal	Not any	28.8	170	85	120	72	no	I have slight problems in walking about	I have no problems washing or dressing myself	I have moderate problems doing my usual activities	I have slight pain or discomfort	I am not anxious or depressed	80		I have moderate problems in walking about	I have no problems washing or dressing myself	I have moderate problems doing my usual activities	I have moderate pain or discomfort	I am extremely anxious or depressed	80	173	80	82	5.6	29.2		I have slight problems in walking about	I have no problems washing or dressing myself	I have severe problems doing my usual activities	I have moderate pain or discomfort	I am extremely anxious or depressed	80	167	84	82	5.6	29.2
Male	49	Not capable of working		Middle	Non smoker	No	No exercise	Normal	Diabetes mellitus	20.2	140	79	66	372	yes	I have severe problems in walking about	I am unable to wash or dress myself	I am unable to do my usual activities	I have severe pain or discomfort	I am not anxious or depressed	40		I have slight problems in walking about	I have no problems washing or dressing myself	I have no problems doing my usual activities	I have moderate pain or discomfort	I am extremely anxious or depressed	45	154	80	62	5.9	20.2		I have slight problems in walking about	I have no problems washing or dressing myself	I have severe problems doing my usual activities	I have moderate pain or discomfort	I am extremely anxious or depressed	43	138	76	62	5.9	20.2
Male	59	Not capable of working	Married	Secondary	Ex-smoker	No	No exercise	Normal	Diabetes mellitus	20.6	190	80	132	72	yes	I have severe problems in walking about	I have slight problems washing or dressing myself	I am unable to do my usual activities	I have moderate pain or discomfort	I am not anxious or depressed	45		I have slight problems in walking about	I have no problems washing or dressing myself	I have no problems doing my usual activities	I have moderate pain or discomfort	I am extremely anxious or depressed	50	205	110	57	5.6	19.2		I have slight problems in walking about	I have no problems washing or dressing myself	I have severe problems doing my usual activities	I have moderate pain or discomfort	I am extremely anxious or depressed	50	186	80	56	5.6
Female	66	Not capable of working	Married	Not educated	Non smoker	No	No exercise	Normal	Diabetes mellitus, Hepatitis	22	150	85	18	48	no	I have slight problems in walking about	I have severe problems washing or dressing myself	I am unable to do my usual activities	I have severe pain or discomfort	I am extremely anxious or depressed	40		I have severe problems in walking about	I have no problems washing or dressing myself	I have no problems doing my usual activities	I have moderate pain or discomfort	I am extremely anxious or depressed	40	165	90	60	5.5	22		I have moderate problems in walking about	I have no problems washing or dressing myself	I have severe problems doing my usual activities	I have moderate pain or discomfort	I am extremely anxious or depressed	45	147	85	59	5.5	21.6
Female	41	Not capable of working	Married	Middle	Non smoker	No	Daily	Low	Hepatitis, Epilepsy	16.4	170	100	60	60	no	I have severe problems in walking about	I have no problems washing or dressing myself	I have severe problems doing my usual activities	I have severe pain or discomfort	I am moderately anxious or depressed	33		I have moderate problems in walking about	I have slight problems washing or dressing myself	I have moderate problems doing my usual activities	I have severe pain or discomfort	I am extremely anxious or depressed	35	170	96	41	5.3	16		I have moderate problems in walking about	I have no problems washing or dressing myself	I have severe problems doing my usual activities	I have moderate pain or discomfort	I am extremely anxious or depressed	35	168	96	41	5.3
Female	37	not working	Married	Not educated	Non smoker	No	No exercise	Normal	Not any	23.3	160	80	84	72	no	I have slight problems in walking about	I have no problems washing or dressing myself	I have moderate problems doing my usual activities	I have severe pain or discomfort	I am slightly anxious or depressed	60		I have severe problems in walking about	I have severe problems washing or dressing myself	I have moderate problems doing my usual activities	I have severe pain or discomfort	I am extremely anxious or depressed	60	160	80	55	5.1	23.3		I have moderate problems in walking about	I have no problems washing or dressing myself	I have severe problems doing my usual activities	I have moderate pain or discomfort	I am extremely anxious or depressed	64	157	81	55	5.1	22.9
female	41	Not capable of working	Married	Not educated	Non smoker	No	No exercise	Low	Not any	21.1	170	98	60	336	yes	I have severe problems in walking about	I have moderate problems washing or dressing myself	I have severe problems doing my usual activities	I have severe pain or discomfort	I am moderately anxious or depressed	45		I have severe problems in walking about	I have moderate problems washing or dressing myself	I have severe problems doing my usual activities	I have severe pain or discomfort	I am extremely anxious or depressed	50	160	90	50	5	21.5		I have moderate problems in walking about	I have no problems washing or dressing myself	I have severe problems doing my usual activities	I have moderate pain or discomfort	I am extremely anxious or depressed	48	164	95	50	5	21.5
Male	42	Not capable of working	Married	Primary	Non smoker	No	Some times	Low	Not any	22.8	150	90	84	24	no	I have slight problems in walking about	I have no problems washing or dressing myself	I have severe problems doing my usual activities	I have severe pain or discomfort	I am slightly anxious or depressed	40		I have severe problems in walking about	I have moderate problems washing or dressing myself	I have severe problems doing my usual activities	I have severe pain or discomfort	I am extremely anxious or depressed	45	140	85	68	5.9	22.1		I have severe problems in walking about	I have no problems washing or dressing myself	I have severe problems doing my usual activities	I have severe pain or discomfort	I am extremely anxious or depressed	45	146	89	69	5.9
Male	53	Doing a job	Married	Secondary	Non smoker	No	No exercise	Low	Diabetes mellitus	25.4	170	90	120	60	no	I have slight problems in walking about	I have no problems washing or dressing myself	I have slight problems doing my usual activities	I have moderate pain or discomfort	I am slightly anxious or depressed	60		I have severe problems in walking about	I have severe problems washing or dressing myself	I have severe problems doing my usual activities	I have severe pain or discomfort	I am extremely anxious or depressed	65	169	86	65	5.1	25.4		I have severe problems in walking about	I have no problems washing or dressing myself	I have severe problems doing my usual activities	I have severe pain or discomfort	I am extremely anxious or depressed	64	165	84	66	5.1	27.5
Male	47	Not capable of working	Married	Middle	Ex-smoker	No	Some times	Low	Diabetes mellitus	27.9	163	91	196	48	yes	I have moderate problems in walking about	I have slight problems washing or dressing myself	I have severe problems doing my usual activities	I have severe pain or discomfort	I am slightly anxious or depressed	35		I have moderate problems in walking about	I have no problems washing or dressing myself	I have severe problems doing my usual activities	I have severe pain or discomfort	I am extremely anxious or depressed	40	165	88	68	5.1	28.3		I have no problems in walking about	I have no problems washing or dressing myself	I have severe problems doing my usual activities	I have severe pain or discomfort	I am extremely anxious or depressed	40	160	90	68	5.1	28.3
Male	45	Doing a job	Married	Graduate	Non smoker	No	No exercise	Normal	Hepatitis	22.1	160	85	96	12	yes	I have severe problems in walking about	I have severe problems washing or dressing myself	I am unable to do my usual activities	I have severe pain or discomfort	I am moderately anxious or depressed	50		I have slight problems in walking about	I have no problems washing or dressing myself	I have severe problems doing my usual activities	I have severe pain or discomfort	I am extremely anxious or depressed	55	150	85	75	6.1	21.8		I have slight problems in walking about	I have no problems washing or dressing myself	I have severe problems doing my usual activities	I have severe pain or discomfort	I am extremely anxious or depressed	54	158	82	75	6.1	21.8
Female	50	not working	Married	Primary	Non smoker	No	No exercise	Low	Diabetes mellitus, Hepatitis	18.1	200	85	12	4	yes	I have moderate problems in walking about	I have no problems washing or dressing myself	I have severe problems doing my usual activities	I have severe pain or discomfort	I am slightly anxious or depressed	60		I have severe problems in walking about	I have no problems washing or dressing myself	I have no problems doing my usual activities	I have severe pain or discomfort	I am extremely anxious or depressed	60	190	80	64	6.2	18.1		I have slight problems in walking about	I have no problems washing or dressing myself	I have severe problems doing my usual activities	I have severe pain or discomfort	I am extremely anxious or depressed	64	194	84	65	6.2
Male	38	Doing a job	Married	Higher secondary	Non smoker	No	No exercise	Low	Diabetes mellitus, Hepatitis	23.4	154	96	12	12	no	I have severe problems in walking about	I have severe problems washing or dressing myself	I am unable to do my usual activities	I have severe pain or discomfort	I am slightly anxious or depressed	45		I have severe problems in walking about	I have no problems washing or dressing myself	I have no problems doing my usual activities	I have severe pain or discomfort	I am extremely anxious or depressed	40	160	83	59	5.2	23.8		I have slight problems in walking about	I have no problems washing or dressing myself	I have severe problems doing my usual activities	I have severe pain or discomfort	I am extremely anxious or depressed	48	150	93	57	5.2	23
Male	51	not working	Married	Middle	Non smoker	No	No exercise	Normal	Hepatitis	29.9	148	88	18	18	no	I have severe problems in walking about	I have no problems washing or dressing myself	I have slight problems doing my usual activities	I have no pain or discomfort	I am moderately anxious or depressed	70		I have moderate problems in walking about	I have severe problems washing or dressing myself	I am unable to do my usual activities	I have severe pain or discomfort	I am extremely anxious or depressed	65	160	90	99	6	29.6		I have slight problems in walking about	I have no problems washing or dressing myself	I have severe problems doing my usual activities	I have severe pain or discomfort	I am extremely anxious or depressed	72	146	87	99	6	29.6
Male	37	Private business	Married	Secondary	Non smoker	No	Daily	Normal	Not any	20.9	150	75	36	36	no	I have slight problems in walking about	I have no problems washing or dressing myself	I have no problems doing my usual activities	I have slight pain or discomfort	I am moderately anxious or depressed	70		I have slight problems in walking about	I have severe problems washing or dressing myself	I am unable to do my usual activities	I have severe pain or discomfort	I am extremely anxious or depressed	75	165	81	79	6.5	20.7		I have slight problems in walking about	I have no problems washing or dressing myself	I have severe problems doing my usual activities	I have severe pain or discomfort	I am extremely anxious or depressed	72	147	74	78	6.5
Female	50	not working	Married	Primary	Non smoker	No	No exercise	Normal	Diabetes mellitus	21.5	154	74	66	72	no	I have moderate problems in walking about	I have no problems washing or dressing myself	I have moderate problems doing my usual activities	I have moderate pain or discomfort	I am slightly anxious or depressed	50		I am unable to walk about	I have no problems washing or dressing myself	I am unable to do my usual activities	I have severe pain or discomfort	I am extremely anxious or depressed	55	160	84	50	5	21.5		I have slight problems in walking about	I have no problems washing or dressing myself	I have severe problems doing my usual activities	I have severe pain or discomfort	I am extremely anxious or depressed	57	150	74	50	5	21.5
Male	62	Doing a job	Married	Secondary	Ex-smoker	No	No exercise	Low	Diabetes mellitus	24.6	149	70	210	43924	yes	I have slight problems in walking about	I have no problems washing or dressing myself	I have severe problems doing my usual activities	I have moderate pain or discomfort	I am not anxious or depressed	60		I have severe problems in walking about	I have severe problems washing or dressing myself	I have slight problems doing my usual activities	I have extreme pain or discomfort	I am extremely anxious or depressed	57	140	70	65	5.4	24.6		I have moderate problems in walking about	I have no problems washing or dressing myself	I have severe problems doing my usual activities	I have severe pain or discomfort	I am extremely anxious or depressed	63	146	70	66	5.4	25
Female	27	not working	Married	Graduate	Non smoker	No	No exercise	Low	Not any	18.1	172	107	36	12	yes	I have slight problems in walking about	I have no problems washing or dressing myself	I have slight problems doing my usual activities	I have slight pain or discomfort	I am moderately anxious or depressed	75		I have moderate problems in walking about	I have moderate problems washing or dressing myself	I have severe problems doing my usual activities	I have extreme pain or discomfort	I am extremely anxious or depressed	75	150	85	44	5.2	17.7		I have moderate problems in walking about	I have no problems washing or dressing myself	I have severe problems doing my usual activities	I have severe pain or discomfort	I am extremely anxious or depressed	75	170	104	44	5.2	17.7
Male	28	not working	Single	Secondary	Non smoker	No	No exercise	Low	Not any	19	148	103	24	24	yes	I have slight problems in walking about	I have no problems washing or dressing myself	I have slight problems doing my usual activities	I have severe pain or discomfort	I am extremely anxious or depressed	60		I have severe problems in walking about	I have severe problems washing or dressing myself	I have severe problems doing my usual activities	I have extreme pain or discomfort	I am extremely anxious or depressed	65	155	95	47.5	5.2	19.2		I have severe problems in walking about	I have no problems washing or dressing myself	I have severe problems doing my usual activities	I have severe pain or discomfort	I am extremely anxious or depressed	64	145	100	48	5.2	19.4
Female	45	not working	Married	Secondary	Non smoker	No	No exercise	Normal	Diabetes mellitus, Hepatitis	28.2	137	50	336	48	yes	I have slight problems in walking about	I have no problems washing or dressing myself	I have no problems doing my usual activities	I have moderate pain or discomfort	I am not anxious or depressed	85		I have moderate problems in walking about	I have slight problems washing or dressing myself	I have severe problems doing my usual activities	I have no pain or discomfort	I am extremely anxious or depressed	80	144	70	69	5.2	27.8		I have no problems in walking about	I have no problems washing or dressing myself	I have severe problems doing my usual activities	I have severe pain or discomfort	I am extremely anxious or depressed	86	134	60	68	5.2
Male	69	Not capable of working	Married	Secondary	Non smoker	No	No exercise	Low	Diabetes mellitus	20.8	168	78	30	1	no	I have severe problems in walking about	I have no problems washing or dressing myself	I have slight problems doing my usual activities	I have moderate pain or discomfort	I am moderately anxious or depressed	50		I have slight problems in walking about	I have slight problems washing or dressing myself	I have severe problems doing my usual activities	I have no pain or discomfort	I am extremely anxious or depressed	50	148	73	50	5.1	20.8		I have no problems in walking about	I have no problems washing or dressing myself	I have no problems doing my usual activities	I have severe pain or discomfort	I am severely anxious or depressed	50	164	78	50	5.1	20.8
Female	46	Not capable of working	Married	Not educated	Smoker	No	No exercise	Low	Not any	19.6	140	75	66	66	no	I am unable to walk about	I am unable to wash or dress myself	I am unable to do my usual activities	I have severe pain or discomfort	I am slightly anxious or depressed	30		I have severe problems in walking about	I have no problems washing or dressing myself	I have no problems doing my usual activities	I have no pain or discomfort	I am extremely anxious or depressed	40	147	78	56	5.6	19.9		I have no problems in walking about	I have no problems washing or dressing myself	I have no problems doing my usual activities	I have severe pain or discomfort	I am severely anxious or depressed	35	137	75	56	5.6
Male	65	Retired	Married	Higher secondary	Ex-smoker	No	No exercise	Low	Not any	22.1	170	71	30	48	no	I have moderate problems in walking about	I have no problems washing or dressing myself	I have moderate problems doing my usual activities	I have slight pain or discomfort	I am not anxious or depressed	70		I have no problems in walking about	I have no problems washing or dressing myself	I am unable to do my usual activities	I have no pain or discomfort	I am extremely anxious or depressed	75	145	65	62	5.6	22.1		I have no problems in walking about	I have no problems washing or dressing myself	I have no problems doing my usual activities	I have severe pain or discomfort	I am severely anxious or depressed	75	167	74	63	5.6	22.4
Female	48	not working	Married	Not educated	Non smoker	No	Some times	Normal	Not any	20.3	170	85	150	48	no	I have no problems in walking about	I have no problems washing or dressing myself	I have no problems doing my usual activities	I have slight pain or discomfort	I am slightly anxious or depressed	85		I have severe problems in walking about	I have severe problems washing or dressing myself	I am unable to do my usual activities	I have no pain or discomfort	I am extremely anxious or depressed	80	190	95	56.5	5.6	20.1		I have no problems in walking about	I have no problems washing or dressing myself	I have no problems doing my usual activities	I have severe pain or discomfort	I am severely anxious or depressed	80	180	82	57	5.6	20.3
Male	37	Not capable of working	Married	Not educated	Non smoker	No	No exercise	Low	Hepatitis	22	167	98	192	12	no	I have moderate problems in walking about	I have slight problems washing or dressing myself	I have severe problems doing my usual activities	I have no pain or discomfort	I am extremely anxious or depressed	50		I have slight problems in walking about	I have no problems washing or dressing myself	I have slight problems doing my usual activities	I have slight pain or discomfort	I am severely anxious or depressed	50	143	80	59	5.5	21.6		I have moderate problems in walking about	I have no problems washing or dressing myself	I have no problems doing my usual activities	I have severe pain or discomfort	I am severely anxious or depressed	50	160	95	58	5.5	21.3
Male	50	not working	Married	Graduate	Non smoker	No	No exercise	Normal	Hepatitis	29.3	151	78	120	60	yes	I have slight problems in walking about	I have no problems washing or dressing myself	I have no problems doing my usual activities	I have no pain or discomfort	I am not anxious or depressed	50		I have moderate problems in walking about	I have slight problems washing or dressing myself	I have severe problems doing my usual activities	I have severe pain or discomfort	I am severely anxious or depressed	50	173	88	79	5.5	29		I have severe problems in walking about	I have no problems washing or dressing myself	I have no problems doing my usual activities	I have severe pain or discomfort	I am severely anxious or depressed	45	165	85	78	5.5
Male	43	Not capable of working	Married	Secondary	Non smoker	No	No exercise	Low	Hepatitis	21.1	157	79	96	96	yes	I have moderate problems in walking about	I have no problems washing or dressing myself	I have no problems doing my usual activities	I have severe pain or discomfort	I am extremely anxious or depressed	40		I have slight problems in walking about	I have no problems washing or dressing myself	I have severe problems doing my usual activities	I have severe pain or discomfort	I am severely anxious or depressed	50	160	76	55	5.3	21.5		I am unable to walk about	I am unable to wash or dress myself	I have moderate problems doing my usual activities	I have slight pain or discomfort	I am not anxious or depressed	45	150	73	56	5.3	21.9
Male	42	Doing a job	Married	Middle	Non smoker	No	No exercise	Low	Diabetes mellitus	26	150	80	48	12	no	I have severe problems in walking about	I have no problems washing or dressing myself	I have moderate problems doing my usual activities	I have extreme pain or discomfort	I am slightly anxious or depressed	25		I have severe problems in walking about	I have no problems washing or dressing myself	I am unable to do my usual activities	I have severe pain or discomfort	I am severely anxious or depressed	20	185	94	72	5.6	25.6		I have moderate problems in walking about	I have severe problems washing or dressing myself	I have severe problems doing my usual activities	I have moderate pain or discomfort	I am not anxious or depressed	30	170	85	70	5.6	24.9
Male	63	Not capable of working	Married	Secondary	Non smoker	No	No exercise	Low	Diabetes mellitus	27	176	81	60	18	yes	I have slight problems in walking about	I have slight problems washing or dressing myself	I have severe problems doing my usual activities	I have no pain or discomfort	I am moderately anxious or depressed	40		I have moderate problems in walking about	I have severe problems washing or dressing myself	I have severe problems doing my usual activities	I have no pain or discomfort	I am severely anxious or depressed	50	150	80	75	5.6	26.7		I have no problems in walking about	I have severe problems washing or dressing myself	I have severe problems doing my usual activities	I have moderate pain or discomfort	I am not anxious or depressed	40	160	89	74	5.6	26.3
Male	60	Private business	Married	Graduate	Smoker	No		Normal	Not any	25.5	162	70	24	96	no	I have no problems in walking about	I have no problems washing or dressing myself	I have no problems doing my usual activities	I have severe pain or discomfort	I am moderately anxious or depressed	60		I have severe problems in walking about	I have severe problems washing or dressing myself	I am unable to do my usual activities	I have no pain or discomfort	I am severely anxious or depressed	55	200	100	77	5.8	25.8		I have slight problems in walking about	I have no problems washing or dressing myself	I have severe problems doing my usual activities	I have moderate pain or discomfort	I am not anxious or depressed	50	182	78	77	5.8
Male	46	Private business	Married	Higher secondary	Ex-smoker	No	No exercise	Normal	Not any	27.9	155	80	12	84	yes	I have no problems in walking about	I have no problems washing or dressing myself	I have no problems doing my usual activities	I have moderate pain or discomfort	I am slightly anxious or depressed	80		I have moderate problems in walking about	I have no problems washing or dressing myself	I have slight problems doing my usual activities	I have slight pain or discomfort	I am not anxious or depressed	70	160	81	75	5.5	27.5		I have no problems in walking about	I have no problems washing or dressing myself	I have no problems doing my usual activities	I have severe pain or discomfort	I am not anxious or depressed	75	150	72	74	5.5	27.1
Male	45	Not capable of working	Married	Higher secondary	Smoker	No	No exercise	Normal	Hepatitis	25.6	144	75	24	24	yes	I have no problems in walking about	I have no problems washing or dressing myself	I have moderate problems doing my usual activities	I have moderate pain or discomfort	I am not anxious or depressed	70		I have moderate problems in walking about	I have no problems washing or dressing myself	I have slight problems doing my usual activities	I have slight pain or discomfort	I am not anxious or depressed	70	145	70	74	5.7	25.6		I have no problems in walking about	I have no problems washing or dressing myself	I have no problems doing my usual activities	I have severe pain or discomfort	I am not anxious or depressed	70	156	79	73	5.7	25.2
Female	55	not working	Married	Secondary	Non smoker	No	No exercise	Normal	Hepatitis	23	145	85	78	78	no	I have severe problems in walking about	I have no problems washing or dressing myself	I have moderate problems doing my usual activities	I have severe pain or discomfort	I am moderately anxious or depressed	50		I have moderate problems in walking about	I have no problems washing or dressing myself	I have slight problems doing my usual activities	I have slight pain or discomfort	I am not anxious or depressed	50	156	75	56	5.2	22.6		I have moderate problems in walking about	I have no problems washing or dressing myself	I have no problems doing my usual activities	I have severe pain or discomfort	I am not anxious or depressed	50	170	88	56	5.2	22.6
Female	62	Not capable of working	Married	Not educated	Non smoker	No	No exercise	Low	Diabetes mellitus, Hepatitis	20.8	162	70	240	132	yes	I have severe problems in walking about	I have severe problems washing or dressing myself	I am unable to do my usual activities	I have extreme pain or discomfort	I am extremely anxious or depressed	30		I have severe problems in walking about	I have no problems washing or dressing myself	I have slight problems doing my usual activities	I have slight pain or discomfort	I am not anxious or depressed	40	190	88	55	5.4	20.8		I have severe problems in walking about	I have no problems washing or dressing myself	I have no problems doing my usual activities	I have severe pain or discomfort	I am not anxious or depressed	35	180	76	55	5.4	20.8
Male	52	Not capable of working	Married	Graduate	Non smoker	No	No exercise		Not any	28.2	150	90	96	4	yes	I have moderate problems in walking about	I have severe problems washing or dressing myself	I have severe problems doing my usual activities	I have severe pain or discomfort	I am severely anxious or depressed	25		I have no problems in walking about	I have no problems washing or dressing myself	I have slight problems doing my usual activities	I have slight pain or discomfort	I am not anxious or depressed	30	160	93	70	5.2	28.2		I have slight problems in walking about	I have no problems washing or dressing myself	I have no problems doing my usual activities	I have severe pain or discomfort	I am not anxious or depressed	30	140	84	69	5.2	27.8
Female	55	not working	Married	Primary	Non smoker	No	No exercise	Low	Not any	29.7	140	75	36	2	yes	I have no problems in walking about	I have slight problems washing or dressing myself	I have severe problems doing my usual activities	I have no pain or discomfort	I am not anxious or depressed	60		I have severe problems in walking about	I have severe problems washing or dressing myself	I have moderate problems doing my usual activities	I have slight pain or discomfort	I am not anxious or depressed	60	150	80	59	4.8	29.2		I have severe problems in walking about	I am unable to wash or dress myself	I have no problems doing my usual activities	I have severe pain or discomfort	I am not anxious or depressed	55	140	75	58	4.8	28.7
Male	50	Not capable of working	Married	Primary	Non smoker	No	No exercise	Low	Not any	20.3	190	93	24	3	no	I am unable to walk about	I am unable to wash or dress myself	I am unable to do my usual activities	I have severe pain or discomfort	I am not anxious or depressed	20		I have slight problems in walking about	I have no problems washing or dressing myself	I have moderate problems doing my usual activities	I have slight pain or discomfort	I am not anxious or depressed	25	159	70	67	6	20		I am unable to walk about	I am unable to wash or dress myself	I have no problems doing my usual activities	I have severe pain or discomfort	I am not anxious or depressed	17	170	85	65	6	19.4
Female	46	not working	Married	Middle	Non smoker	No	No exercise	Low	Not any	21.3	150	85	66	60	no	I have no problems in walking about	I have no problems washing or dressing myself	I have slight problems doing my usual activities	I have no pain or discomfort	I am not anxious or depressed	80		I have moderate problems in walking about	I have no problems washing or dressing myself	I have moderate problems doing my usual activities	I have slight pain or discomfort	I am not anxious or depressed	75	175	85	61	5.6	21.7		I have slight problems in walking about	I have slight problems washing or dressing myself	I have no problems doing my usual activities	I have severe pain or discomfort	I am not anxious or depressed	70	155	88	62	5.6	22.1
Female	51	not working	Married	Secondary	Non smoker	No	No exercise	Normal	Diabetes mellitus, Hepatitis	22.8	186	72	240	12	yes	I have severe problems in walking about	I have severe problems washing or dressing myself	I have severe problems doing my usual activities	I have extreme pain or discomfort	I am extremely anxious or depressed	45		I have severe problems in walking about	I have no problems washing or dressing myself	I have severe problems doing my usual activities	I have slight pain or discomfort	I am not anxious or depressed	50	148	70	65	5.6	23.1		I have moderate problems in walking about	I have slight problems washing or dressing myself	I have no problems doing my usual activities	I have severe pain or discomfort	I am not anxious or depressed	50	165	67	67	5.6	23.8
Male	31	not working	Single	Not educated	Non smoker	No	Some times	Low	Hepatitis	21.2	170	90	84	2	yes	I have slight problems in walking about	I have no problems washing or dressing myself	I have severe problems doing my usual activities	I have moderate pain or discomfort	I am not anxious or depressed	70		I have slight problems in walking about	I have no problems washing or dressing myself	I have severe problems doing my usual activities	I have slight pain or discomfort	I am not anxious or depressed	65	180	83	66	5.9	21.5		I have moderate problems in walking about	I have slight problems washing or dressing myself	I have no problems doing my usual activities	I have severe pain or discomfort	I am not anxious or depressed	70	190	87	67	5.9	21.8
Female	50	not working	Married	Secondary	Non smoker	No	Some times	Low	Not any	23.8	170	110	96	2	no	I have slight problems in walking about	I have no problems washing or dressing myself	I have slight problems doing my usual activities	I have slight pain or discomfort	I am slightly anxious or depressed	50		I have slight problems in walking about	I have no problems washing or dressing myself	I have no problems doing my usual activities	I have slight pain or discomfort	I am not anxious or depressed	55	160	95	60	5.2	24.2		I have moderate problems in walking about	I have slight problems washing or dressing myself	I have no problems doing my usual activities	I have severe pain or discomfort	I am not anxious or depressed	55	150	90	61	5.2
Female	50	not working	Married	Middle	Non smoker	No	No exercise	Low	Hepatitis	23.8	140	90	24	24	no	I have no problems in walking about	I have no problems washing or dressing myself	I have no problems doing my usual activities	I have slight pain or discomfort	I am not anxious or depressed	90		I have no problems in walking about	I have no problems washing or dressing myself	I have no problems doing my usual activities	I have slight pain or discomfort	I am not anxious or depressed	90	140	80	59	5.3	23		I have severe problems in walking about	I have slight problems washing or dressing myself	I have no problems doing my usual activities	I have severe pain or discomfort	I am not anxious or depressed	90	149	90	58	5.3	22.7
Male	32	not working	Single	Middle	Non smoker	No	Some times	Low	Not any	15.7	140	80	120	120	yes	I have moderate problems in walking about	I have no problems washing or dressing myself	I have severe problems doing my usual activities	I have severe pain or discomfort	I am not anxious or depressed	25		I have no problems in walking about	I have no problems washing or dressing myself	I have no problems doing my usual activities	I have slight pain or discomfort	I am not anxious or depressed	30	150	85	44	5.6	15.7		I have no problems in walking about	I have slight problems washing or dressing myself	I have no problems doing my usual activities	I have severe pain or discomfort	I am not anxious or depressed	20	143	82	44	5.6	15.7
Female	45	not working	Married	Middle	Non smoker	No	No exercise	Low	Diabetes mellitus	29.9	150	80	384	108	yes	I have severe problems in walking about	I have moderate problems washing or dressing myself	I have severe problems doing my usual activities	I have extreme pain or discomfort	I am not anxious or depressed	35		I have no problems in walking about	I have no problems washing or dressing myself	I have no problems doing my usual activities	I have slight pain or discomfort	I am not anxious or depressed	30	140	83	83	5.6	29.5		I have moderate problems in walking about	I have moderate problems washing or dressing myself	I have no problems doing my usual activities	I have severe pain or discomfort	I am not anxious or depressed	30	145	78	83	5.6	29.5
Female	41	not working	Married	Secondary	Non smoker	No	Daily	Normal	Cardio vascular disease, Hepatitis	22.7	170	100	36	36	no	I have severe problems in walking about	I have no problems washing or dressing myself	I am unable to do my usual activities	I have severe pain or discomfort	I am not anxious or depressed	60		I have no problems in walking about	I have no problems washing or dressing myself	I have no problems doing my usual activities	I have slight pain or discomfort	I am not anxious or depressed	65	180	90	60	5.4	22.7		I have moderate problems in walking about	I have severe problems washing or dressing myself	I have no problems doing my usual activities	I have severe pain or discomfort	I am not anxious or depressed	60	160	95	60	5.4
Female	30	not working	Married	Primary	Non smoker	No	No exercise	Low	Hepatitis	26.7	180	90	186	24	yes	I have moderate problems in walking about	I have no problems washing or dressing myself	I have moderate problems doing my usual activities	I have slight pain or discomfort	I am not anxious or depressed	55		I have no problems in walking about	I have no problems washing or dressing myself	I am unable to do my usual activities	I have slight pain or discomfort	I am not anxious or depressed	55	210	105	63	5	27.1		I have moderate problems in walking about	I have severe problems washing or dressing myself	I have no problems doing my usual activities	I have severe pain or discomfort	I am not anxious or depressed	50	190	94	64	5	27.6
Male	28	not working	Single	Higher secondary	Non smoker	No	Daily	Low	Not any	26.1	160	100	39	24	yes	I have no problems in walking about	I have no problems washing or dressing myself	I have no problems doing my usual activities	I have moderate pain or discomfort	I am moderately anxious or depressed	70		I have no problems in walking about	I have no problems washing or dressing myself	I am unable to do my usual activities	I have slight pain or discomfort	I am not anxious or depressed	70	168	89	77	5.8	25.8		I have severe problems in walking about	I have severe problems washing or dressing myself	I have no problems doing my usual activities	I have severe pain or discomfort	I am not anxious or depressed	70	150	90	76	5.8	25.5
Male	36	Not capable of working	Married	Middle	Ex-smoker	No	No exercise	Normal	Hepatitis	19.4	160	85	24	24	no	I have moderate problems in walking about	I have no problems washing or dressing myself	I am unable to do my usual activities	I have moderate pain or discomfort	I am moderately anxious or depressed	55		I have moderate problems in walking about	I have no problems washing or dressing myself	I am unable to do my usual activities	I have slight pain or discomfort	I am not anxious or depressed	60	152	75	58	5.8	19.4		I have severe problems in walking about	I have severe problems washing or dressing myself	I have no problems doing my usual activities	I have severe pain or discomfort	I am not anxious or depressed	60	165	85	57	5.8	19.1
Male	65	Not capable of working	Married	Primary	Ex-smoker	No	No exercise	Low	Diabetes mellitus, Hepatitis	24.2	180	75	108	9	no	I have severe problems in walking about	I have severe problems washing or dressing myself	I am unable to do my usual activities	I have severe pain or discomfort	I am not anxious or depressed	50		I have severe problems in walking about	I have no problems washing or dressing myself	I am unable to do my usual activities	I have slight pain or discomfort	I am not anxious or depressed	50	190	100	81	6	24.2		I have severe problems in walking about	I have severe problems washing or dressing myself	I have no problems doing my usual activities	I have severe pain or discomfort	I am not anxious or depressed	50	170	80	80	6	23.9
Female	27	not working	Single	Higher secondary	Non smoker	No	Some times	High	Cardio vascular disease, Stomach issue	19.4	160	85	48	24	yes	I have slight problems in walking about	I have no problems washing or dressing myself	I have no problems doing my usual activities	I have moderate pain or discomfort	I am extremely anxious or depressed	50		I have moderate problems in walking about	I have slight problems washing or dressing myself	I have moderate problems doing my usual activities	I have moderate pain or discomfort	I am not anxious or depressed	50	150	80	57	5.8	19.1		I am unable to walk about	I have severe problems washing or dressing myself	I have no problems doing my usual activities	I have severe pain or discomfort	I am not anxious or depressed	50	168	82	57	5.8
Male	48	Not capable of working	Married	Middle	Ex-smoker	No	Some times	Low	Not any	24.2	196	90	30	24	no	I have no problems in walking about	I have no problems washing or dressing myself	I have no problems doing my usual activities	I have moderate pain or discomfort	I am slightly anxious or depressed	70		I have moderate problems in walking about	I have moderate problems washing or dressing myself	I have moderate problems doing my usual activities	I have moderate pain or discomfort	I am not anxious or depressed	70	200	110	67	5.6	23.8		I have slight problems in walking about	I have no problems washing or dressing myself	I have no problems doing my usual activities	I have severe pain or discomfort	I am not anxious or depressed	75	180	88	66	5.6	23.5
Male	63	Not capable of working	Married	Middle	Non smoker	No	No exercise	Low	Diabetes mellitus, Hepatitis	23.5	140	70	12	2	no	I have severe problems in walking about	I have moderate problems washing or dressing myself	I have severe problems doing my usual activities	I have moderate pain or discomfort	I am not anxious or depressed	80		I have moderate problems in walking about	I have no problems washing or dressing myself	I have moderate problems doing my usual activities	I have moderate pain or discomfort	I am not anxious or depressed	80	165	90	67	5.6	23.8		I have moderate problems in walking about	I have no problems washing or dressing myself	I have no problems doing my usual activities	I have severe pain or discomfort	I am not anxious or depressed	85	160	80	67	5.6	23.8
Male	47	Private business	Married	Higher secondary	Non smoker	No	No exercise	Normal	Diabetes mellitus, Hepatitis	25.4	140	70	60	12	yes	I have severe problems in walking about	I have no problems washing or dressing myself	I have severe problems doing my usual activities	I have no pain or discomfort	I am extremely anxious or depressed	70		I have moderate problems in walking about	I have no problems washing or dressing myself	I have moderate problems doing my usual activities	I have moderate pain or discomfort	I am not anxious or depressed	75	170	85	60	5	25.8		I have moderate problems in walking about	I have no problems washing or dressing myself	I have no problems doing my usual activities	I have severe pain or discomfort	I am not anxious or depressed	72	150	77	60	5	25.8
Male	28	Not capable of working	Married	Primary	Non smoker	No	No exercise	Low	Not any	20.5	160	90	18	18	no	I have slight problems in walking about	I have slight problems washing or dressing myself	I have no problems doing my usual activities	I have slight pain or discomfort	I am extremely anxious or depressed	40		I have severe problems in walking about	I have moderate problems washing or dressing myself	I have severe problems doing my usual activities	I have moderate pain or discomfort	I am not anxious or depressed	50	150	82	58.4	5.5	21.4		I have slight problems in walking about	I have no problems washing or dressing myself	I have no problems doing my usual activities	I have severe pain or discomfort	I am not anxious or depressed	45	165	87	60	5.5	22
Male	59	Doing a job	Married	Middle	Non smoker	No	Daily	Low	Diabetes mellitus, Hepatitis	26.2	180	75	96	9	no	I have no problems in walking about	I have no problems washing or dressing myself	I have slight problems doing my usual activities	I have no pain or discomfort	I am not anxious or depressed	85		I have moderate problems in walking about	I have no problems washing or dressing myself	I have severe problems doing my usual activities	I have moderate pain or discomfort	I am not anxious or depressed	87	190	90	76	5.7	26.2		I have moderate problems in walking about	I have no problems washing or dressing myself	I have no problems doing my usual activities	I have severe pain or discomfort	I am not anxious or depressed	80	180	75	76	5.7	26.2
Female	19	not working	Single	Middle	Non smoker	No	Some times	Low	Cardio vascular disease	19.1	150	80	132	6	no	I have slight problems in walking about	I have no problems washing or dressing myself	I have slight problems doing my usual activities	I have severe pain or discomfort	I am moderately anxious or depressed	50		I have moderate problems in walking about	I have no problems washing or dressing myself	I have severe problems doing my usual activities	I have moderate pain or discomfort	I am not anxious or depressed	50	140	75	42	4.9	20		I have slight problems in walking about	I have no problems washing or dressing myself	I have no problems doing my usual activities	I have severe pain or discomfort	I am not anxious or depressed	50	150	80	43	4.9	20.5
Male	66	Private business	Married	Secondary	Ex-smoker	No	No exercise	Normal	Not any	21.2	160	100	60	60	no	I have no problems in walking about	I have no problems washing or dressing myself	I have no problems doing my usual activities	I have moderate pain or discomfort	I am not anxious or depressed	75		I have severe problems in walking about	I have no problems washing or dressing myself	I have severe problems doing my usual activities	I have moderate pain or discomfort	I am not anxious or depressed	80	176	80	65	5.9	21.2		I have slight problems in walking about	I have no problems washing or dressing myself	I have no problems doing my usual activities	I have severe pain or discomfort	I am not anxious or depressed	80	160	100	66	5.9	21.5
Male	49	Doing a job	Married	Secondary	Non smoker	No	No exercise	Low	Not any	24.5	160	100	60	12	no	I have no problems in walking about	I have no problems washing or dressing myself	I have no problems doing my usual activities	I have slight pain or discomfort	I am not anxious or depressed	90		I have slight problems in walking about	I have no problems washing or dressing myself	I have severe problems doing my usual activities	I have moderate pain or discomfort	I am not anxious or depressed	90	160	70	69	5.7	23.8		I have moderate problems in walking about	I have no problems washing or dressing myself	I have no problems doing my usual activities	I have severe pain or discomfort	I am not anxious or depressed	90	170	90	68	5.7
Female	55	Not capable of working	Married	Not educated	Non smoker	No	No exercise	Low	Diabetes mellitus, Hepatitis	31.5	175	90	108	12	yes	I am unable to walk about	I am unable to wash or dress myself	I am unable to do my usual activities	I have severe pain or discomfort	I am slightly anxious or depressed	35		I have slight problems in walking about	I have no problems washing or dressing myself	I have no problems doing my usual activities	I have moderate pain or discomfort	I am not anxious or depressed	25	193	98	56	4.5	30.9		I have moderate problems in walking about	I have no problems washing or dressing myself	I have no problems doing my usual activities	I have severe pain or discomfort	I am not anxious or depressed	30	185	95	55	4.5	30.3
Female	61	Not capable of working	Married	Primary	Non smoker	No	No exercise	Normal	Hepatitis	29.3	180	120	84	84	no	I have severe problems in walking about	I have no problems washing or dressing myself	I am unable to do my usual activities	I have severe pain or discomfort	I am moderately anxious or depressed	40		I have no problems in walking about	I have no problems washing or dressing myself	I have no problems doing my usual activities	I have moderate pain or discomfort	I am not anxious or depressed	50	165	90	68	5	29.3		I have severe problems in walking about	I have no problems washing or dressing myself	I have no problems doing my usual activities	I have severe pain or discomfort	I am not anxious or depressed	45	160	110	68	5	29.3
Male	40	not working	Married	Primary	Non smoker	No	Daily	Normal	Hepatitis	18.5	160	100	60	36	yes	I have slight problems in walking about	I have no problems washing or dressing myself	I have no problems doing my usual activities	I have slight pain or discomfort	I am not anxious or depressed	85		I have no problems in walking about	I have no problems washing or dressing myself	I have no problems doing my usual activities	I have moderate pain or discomfort	I am not anxious or depressed	75	161	100	56	5.6	19.9		I have no problems in walking about	I have no problems washing or dressing myself	I have no problems doing my usual activities	I have severe pain or discomfort	I am not anxious or depressed	75	180	110	57	5.6	20.3
Female	60	Not capable of working	Married	Primary	Non smoker	No	No exercise	Low	Hepatitis	31.4	150	70	228	36	yes	I have moderate problems in walking about	I have no problems washing or dressing myself	I have moderate problems doing my usual activities	I have severe pain or discomfort	I am moderately anxious or depressed	60		I have no problems in walking about	I have no problems washing or dressing myself	I have no problems doing my usual activities	I have moderate pain or discomfort	I am not anxious or depressed	60	173	90	81	5.4	30.7		I have no problems in walking about	I have no problems washing or dressing myself	I have no problems doing my usual activities	I have severe pain or discomfort	I am not anxious or depressed	55	170	90	80	5.4	30.3
Male	40	not working	Married	Higher secondary	Smoker	No	No exercise	Low	Hepatitis	19.7	150	90	240	60	yes	I have severe problems in walking about	I have no problems washing or dressing myself	I have moderate problems doing my usual activities	I have severe pain or discomfort	I am moderately anxious or depressed	50		I have no problems in walking about	I have no problems washing or dressing myself	I have no problems doing my usual activities	I have moderate pain or discomfort	I am not anxious or depressed	50	151	74	65	5.11	20		I have no problems in walking about	I have no problems washing or dressing myself	I have no problems doing my usual activities	I have severe pain or discomfort	I am not anxious or depressed	50	150	90	66	5.11	20.3
Male	48	Not capable of working	Married	Graduate	Non smoker	No	No exercise	Low	Not any	23.3	140	90	72	24	yes	I have moderate problems in walking about	I have no problems washing or dressing myself	I have slight problems doing my usual activities	I have slight pain or discomfort	I am not anxious or depressed	50		I have no problems in walking about	I have no problems washing or dressing myself	I have no problems doing my usual activities	I have moderate pain or discomfort	I am not anxious or depressed	55	145	70	75.8	6	22.7		I have no problems in walking about	I have no problems washing or dressing myself	I have no problems doing my usual activities	I have severe pain or discomfort	I am not anxious or depressed	50	148	88	74	6	22.1
Male	52	Not capable of working	Married	Middle	Ex-smoker	No	No exercise	Low	Diabetes mellitus	26	150	90	16	16	no	I have severe problems in walking about	I have no problems washing or dressing myself	I have severe problems doing my usual activities	I have slight pain or discomfort	I am not anxious or depressed	50		I have no problems in walking about	I have no problems washing or dressing myself	I have no problems doing my usual activities	I have moderate pain or discomfort	I am not anxious or depressed	55	158	84	71.7	5.6	25.5		I have slight problems in walking about	I have no problems washing or dressing myself	I have no problems doing my usual activities	I have severe pain or discomfort	I am not anxious or depressed	47	150	90	70	5.6	24.9
Male	70	Not capable of working	Married	Graduate	Non smoker	No	Once a week	Low	Not any	22.8	150	90	36	36	no	I have moderate problems in walking about	I have no problems washing or dressing myself	I have severe problems doing my usual activities	I have no pain or discomfort	I am not anxious or depressed	70		I have no problems in walking about	I have no problems washing or dressing myself	I have no problems doing my usual activities	I have moderate pain or discomfort	I am not anxious or depressed	75	162	88	69	5.8	23.1		I have slight problems in walking about	I have no problems washing or dressing myself	I have no problems doing my usual activities	I have severe pain or discomfort	I am not anxious or depressed	73	165	100	70	5.8	23.5
Female	50	Not capable of working	Married	Higher secondary	Non smoker	No	No exercise	Normal	Diabetes mellitus	32.5	150	90	66	24	no	I have severe problems in walking about	I have severe problems washing or dressing myself	I have slight problems doing my usual activities	I have extreme pain or discomfort	I am extremely anxious or depressed	50		I have severe problems in walking about	I have no problems washing or dressing myself	I have no problems doing my usual activities	I have moderate pain or discomfort	I am not anxious or depressed	50	165	82	87	5.4	32.9		I have slight problems in walking about	I have no problems washing or dressing myself	I have no problems doing my usual activities	I have severe pain or discomfort	I am not anxious or depressed	50	155	92	87	5.4
Male	31	Not capable of working	Married	Secondary	Non smoker	No	No exercise	Normal	Hepatitis	18.9	141	86	120	120	yes	I have severe problems in walking about	I have no problems washing or dressing myself	I am unable to do my usual activities	I have severe pain or discomfort	I am moderately anxious or depressed	40		I have no problems in walking about	I have no problems washing or dressing myself	I am unable to do my usual activities	I have moderate pain or discomfort	I am not anxious or depressed	45	142	78	54	5.6	19.2		I have no problems in walking about	I have no problems washing or dressing myself	I have no problems doing my usual activities	I have severe pain or discomfort	I am not anxious or depressed	45	150	90	54	5.6	19.2
Male	32	Not capable of working	Married	Not educated	Ex-smoker	No	No exercise	Low	Hepatitis	26.2	173	75	120	36	no	I have no problems in walking about	I have no problems washing or dressing myself	I have severe problems doing my usual activities	I have extreme pain or discomfort	I am moderately anxious or depressed	40		I have no problems in walking about	I have no problems washing or dressing myself	I am unable to do my usual activities	I have moderate pain or discomfort	I am not anxious or depressed	40	170	90	54	4.8	27.7		I have no problems in walking about	I have no problems washing or dressing myself	I have no problems doing my usual activities	I have severe pain or discomfort	I am not anxious or depressed	35	158	80	55	4.8	27.2
Male	33	Doing a job	Married	Higher secondary	Non smoker	No	No exercise	Low	Not any	18.1	166	100	48	48	yes	I have no problems in walking about	I have no problems washing or dressing myself	I have no problems doing my usual activities	I have severe pain or discomfort	I am moderately anxious or depressed	44		I have slight problems in walking about	I have no problems washing or dressing myself	I have slight problems doing my usual activities	I have severe pain or discomfort	I am not anxious or depressed	40	166	93	55	5.8	18.4		I have no problems in walking about	I have no problems washing or dressing myself	I have no problems doing my usual activities	I have severe pain or discomfort	I am not anxious or depressed	40	160	100	55	5.8	18.4
Female	50	Not capable of working	Married	Secondary	Non smoker	No	No exercise	Low	Diabetes mellitus	25.7	185	86	12	6	yes	I am unable to walk about	I am unable to wash or dress myself	I am unable to do my usual activities	I have extreme pain or discomfort	I am slightly anxious or depressed	20		I have severe problems in walking about	I have no problems washing or dressing myself	I have slight problems doing my usual activities	I have severe pain or discomfort	I am not anxious or depressed	25	199	108	52	4.8	25.7		I have no problems in walking about	I have no problems washing or dressing myself	I have no problems doing my usual activities	I have severe pain or discomfort	I am not anxious or depressed	20	190	89	54	4.8	26.7
Male	44	not working	Married	Secondary	Smoker	No	No exercise	Normal	Hepatitis	18.1	143	73	48	48	no	I have moderate problems in walking about	I have no problems washing or dressing myself	I have severe problems doing my usual activities	I have severe pain or discomfort	I am not anxious or depressed	45		I have moderate problems in walking about	I have no problems washing or dressing myself	I have severe problems doing my usual activities	I have severe pain or discomfort	I am not anxious or depressed	50	140	80	64	6.2	18.1		I have no problems in walking about	I have no problems washing or dressing myself	I have no problems doing my usual activities	I have severe pain or discomfort	I am not anxious or depressed	50	150	77	65	6.2	18.4
Male	65	Not capable of working	Married	Higher secondary	Ex-smoker	No	No exercise	Low	Hepatitis	25	180	100	120	30	yes	I have severe problems in walking about	I have no problems washing or dressing myself	I have severe problems doing my usual activities	I have severe pain or discomfort	I am moderately anxious or depressed	50		I have moderate problems in walking about	I have no problems washing or dressing myself	I have severe problems doing my usual activities	I have severe pain or discomfort	I am not anxious or depressed	45	160	85	60	5	25.8		I have no problems in walking about	I have no problems washing or dressing myself	I have no problems doing my usual activities	I have severe pain or discomfort	I am not anxious or depressed	50	170	90	60	5	25.8
Male	52	Not capable of working	Married	Middle	Non smoker	No	No exercise	Low	Hepatitis	23.2	160	90	60	60	no	I have slight problems in walking about	I have no problems washing or dressing myself	I have no problems doing my usual activities	I have severe pain or discomfort	I am extremely anxious or depressed	40		I have slight problems in walking about	I have no problems washing or dressing myself	I have no problems doing my usual activities	I have severe pain or discomfort	I am not anxious or depressed	50	170	90	46	4.8	22.7		I have no problems in walking about	I have no problems washing or dressing myself	I have no problems doing my usual activities	I have severe pain or discomfort	I am not anxious or depressed	50	150	86	46	4.8
Male	55	Not capable of working	Married	Higher secondary	Ex-smoker	No	No exercise	Normal	Not any	30.8	140	80	60	60	yes	I have no problems in walking about	I have no problems washing or dressing myself	I have no problems doing my usual activities	I have severe pain or discomfort	I am not anxious or depressed	80		I have moderate problems in walking about	I have no problems washing or dressing myself	I have no problems doing my usual activities	I have severe pain or discomfort	I am not anxious or depressed	75	152	80	92.4	5.8	31		I have severe problems in walking about	I have no problems washing or dressing myself	I have no problems doing my usual activities	I have severe pain or discomfort	I am not anxious or depressed	70	150	85	93	5.8	31.2
Male	40	Not capable of working	Married	Graduate	Ex-smoker	No	No exercise	Low	Not any	27.6	150	90	24	24	no	I have slight problems in walking about	I have no problems washing or dressing myself	I have no problems doing my usual activities	I have severe pain or discomfort	I am moderately anxious or depressed	35		I have no problems in walking about	I have no problems washing or dressing myself	I have no problems doing my usual activities	I have severe pain or discomfort	I am not anxious or depressed	35	144	70	74	5.4	28		I have severe problems in walking about	I have no problems washing or dressing myself	I have no problems doing my usual activities	I have severe pain or discomfort	I am not anxious or depressed	30	140	88	74	5.4	28
Male	42	Doing a job	Married	Higher secondary	Non smoker	No	Daily	Low	Not any	22.4	160	90	96	36	yes	I have slight problems in walking about	I have no problems washing or dressing myself	I have no problems doing my usual activities	I have moderate pain or discomfort	I am not anxious or depressed	55		I have severe problems in walking about	I have no problems washing or dressing myself	I have no problems doing my usual activities	I have severe pain or discomfort	I am not anxious or depressed	50	167	75	64	5.6	22.8		I have no problems in walking about	I have no problems washing or dressing myself	I have no problems doing my usual activities	I have extreme pain or discomfort	I am not anxious or depressed	50	170	94	64	5.6	22.8
Male	55	Not capable of working	Married	Not educated	Non smoker	No	No exercise	Low	Diabetes mellitus	39.9	160	100	60	12	yes	I have moderate problems in walking about	I have severe problems washing or dressing myself	I have severe problems doing my usual activities	I have no pain or discomfort	I am severely anxious or depressed	30		I have severe problems in walking about	I have no problems washing or dressing myself	I am unable to do my usual activities	I have severe pain or discomfort	I am not anxious or depressed	35	161	90	76	4.6	40.4		I have no problems in walking about	I have no problems washing or dressing myself	I have no problems doing my usual activities	I have extreme pain or discomfort	I am not anxious or depressed	30	153	97	77	4.6
Female	46	not working	Married	Secondary	Non smoker	No	Some times	Low	Not any	19.9	170	90	60	6	no	I have moderate problems in walking about	I have no problems washing or dressing myself	I have severe problems doing my usual activities	I have moderate pain or discomfort	I am slightly anxious or depressed	65		I have severe problems in walking about	I have severe problems washing or dressing myself	I am unable to do my usual activities	I have severe pain or discomfort	I am not anxious or depressed	70	150	80	56	5.6	19.9		I have moderate problems in walking about	I have no problems washing or dressing myself	I have no problems doing my usual activities	I have extreme pain or discomfort	I am not anxious or depressed	70	160	85	56	5.6	19.9
Male	30	not working	Married	Higher secondary	Non smoker	No	No exercise	Low	Hepatitis	19.1	170	90	30	3	no	I have no problems in walking about	I have no problems washing or dressing myself	I have moderate problems doing my usual activities	I have moderate pain or discomfort	I am not anxious or depressed	60		I have severe problems in walking about	I have severe problems washing or dressing myself	I am unable to do my usual activities	I have severe pain or discomfort	I am not anxious or depressed	65	162	85	51	5.5	18.7		I have no problems in walking about	I have no problems washing or dressing myself	I have no problems doing my usual activities	I have extreme pain or discomfort	I am not anxious or depressed	60	180	90	51	5.5	18.7
Male	66	Retired	Married	Graduate	Ex-smoker	No	No exercise	Normal	Diabetes mellitus, Hepatitis	21.1	150	80	72	8	yes	I have severe problems in walking about	I am unable to wash or dress myself	I am unable to do my usual activities	I have severe pain or discomfort	I am not anxious or depressed	30		I have severe problems in walking about	I am unable to wash or dress myself	I am unable to do my usual activities	I have severe pain or discomfort	I am not anxious or depressed	35	179	90	63	5.8	21.1		I have moderate problems in walking about	I have no problems washing or dressing myself	I am unable to do my usual activities	I have extreme pain or discomfort	I am not anxious or depressed	35	159	85	63	5.8	21.1
Female	29	Doing a job	Single	Graduate	Non smoker	No	Once a week	Low	Not any	19.4	160	80	18	18	yes	I have no problems in walking about	I have no problems washing or dressing myself	I have slight problems doing my usual activities	I have slight pain or discomfort	I am not anxious or depressed	50		I am unable to walk about	I have no problems washing or dressing myself	I am unable to do my usual activities	I have severe pain or discomfort	I am not anxious or depressed	50	143	77	45	5	19.4		I have severe problems in walking about	I have no problems washing or dressing myself	I am unable to do my usual activities	I have extreme pain or discomfort	I am not anxious or depressed	50	150	90	46	5
Female	25	not working	Single	Secondary	Non smoker	No	No exercise	Low	Not any	19	157	96	96	12	no	I have slight problems in walking about	I have no problems washing or dressing myself	I have no problems doing my usual activities	I have no pain or discomfort	I am not anxious or depressed	90		I am unable to walk about	I have no problems washing or dressing myself	I am unable to do my usual activities	I have severe pain or discomfort	I am not anxious or depressed	90	160	90	47	5.2	19		I have no problems in walking about	I have no problems washing or dressing myself	I am unable to do my usual activities	I have extreme pain or discomfort	I am not anxious or depressed	90	150	90	47	5.2
Male	57	Retired	Married	Graduate	Non smoker	No	No exercise	Low	Hepatitis	29.6	159	89	180	96	yes	I have no problems in walking about	I have no problems washing or dressing myself	I have no problems doing my usual activities	I have severe pain or discomfort	I am not anxious or depressed	70		I am unable to walk about	I have no problems washing or dressing myself	I am unable to do my usual activities	I have extreme pain or discomfort	I am not anxious or depressed	60	170	95	70	5.1	29.2		I am unable to walk about	I am unable to wash or dress myself	I am unable to do my usual activities	I have extreme pain or discomfort	I am not anxious or depressed	65	160	90	70	5.1	29.2
Male	38	Private business	Married	Middle	Non smoker	No	Once a week	Low	Kidney stone surgery	36.7	162	90			no	I have moderate problems in walking about	I have no problems washing or dressing myself	I have slight problems doing my usual activities	I have slight pain or discomfort	I am not anxious or depressed	50		I have slight problems in walking about	I have no problems washing or dressing myself	I have slight problems doing my usual activities	I have no pain or discomfort	I am not anxious or depressed	50	142	78	96	5.4	36.3		I am unable to walk about	I am unable to wash or dress myself	I am unable to do my usual activities	I have extreme pain or discomfort	I am not anxious or depressed	50	140	85	95	5.4	35.9
Female	37	Labour	Married	Higher secondary	Non smoker	No	No exercise		Diabetes mellitus	27.1	145	88	72	1	no	I am unable to walk about	I am unable to wash or dress myself	I am unable to do my usual activities	I have severe pain or discomfort	I am slightly anxious or depressed	20		I have no problems in walking about	I have no problems washing or dressing myself	I have slight problems doing my usual activities	I have no pain or discomfort	I am not anxious or depressed	20	140	73	73	5.5	26.8		I am unable to walk about	I am unable to wash or dress myself	I am unable to do my usual activities	I have no pain or discomfort	I am not anxious or depressed	20	150	90	73	5.5	26.8
Female	60	Not capable of working	Married	Secondary	Non smoker	No	No exercise	Normal	Cardio vascular disease	27.1	157	84	12	8	no	I have moderate problems in walking about	I have severe problems washing or dressing myself	I am unable to do my usual activities	I have moderate pain or discomfort	I am not anxious or depressed	40		I have no problems in walking about	I have no problems washing or dressing myself	I have slight problems doing my usual activities	I have no pain or discomfort	I am not anxious or depressed	45	165	92	75	5.5	27.5		I am unable to walk about	I have no problems washing or dressing myself	I am unable to do my usual activities	I have no pain or discomfort	I am not anxious or depressed	45	175	100	75	5.5	27.5
Female	45	not working	Married	Primary	Non smoker	No	No exercise	Normal	Diabetes mellitus	41	160	64	48	3	no	I have moderate problems in walking about	I have no problems washing or dressing myself	I am unable to do my usual activities	I have no pain or discomfort	I am not anxious or depressed	70		I have slight problems in walking about	I have no problems washing or dressing myself	I have moderate problems doing my usual activities	I have no pain or discomfort	I am not anxious or depressed	65	180	100	83	4.8	41		I have severe problems in walking about	I have moderate problems washing or dressing myself	I am unable to do my usual activities	I have no pain or discomfort	I am not anxious or depressed	72	160	64	82	4.8
Female	38	Private business	Married	Secondary	Non smoker	No	No exercise	Normal	Diabetes mellitus	24.2	140	68	84	4	no	I have slight problems in walking about	I have no problems washing or dressing myself	I have moderate problems doing my usual activities	I have slight pain or discomfort	I am not anxious or depressed	70		I have moderate problems in walking about	I have no problems washing or dressing myself	I have moderate problems doing my usual activities	I have no pain or discomfort	I am not anxious or depressed	73	141	70	70	5.6	24.2		I have severe problems in walking about	I have moderate problems washing or dressing myself	I am unable to do my usual activities	I have no pain or discomfort	I am not anxious or depressed	70	147	68	70	5.6	24.9
Female	40	not working	Married	Primary	Non smoker	No	Once a week	Low	Hepatitis	20.3	150	80	30	24	no	I have no problems in walking about	I have no problems washing or dressing myself	I have moderate problems doing my usual activities	I have no pain or discomfort	I am slightly anxious or depressed	85		I have moderate problems in walking about	I have no problems washing or dressing myself	I have severe problems doing my usual activities	I have no pain or discomfort	I am not anxious or depressed	80	171	89	43	4.8	21.3		I have severe problems in walking about	I have moderate problems washing or dressing myself	I am unable to do my usual activities	I have no pain or discomfort	I am not anxious or depressed	80	150	80	45	4.8	22.2
Male	58	Not capable of working	Married	Primary	Ex-smoker	No	No exercise	Low	Cardio vascular disease, Diabetes mellitus	21.3	160	90	3	2	no	I have slight problems in walking about	I have no problems washing or dressing myself	I am unable to do my usual activities	I have severe pain or discomfort	I am severely anxious or depressed	40		I have slight problems in walking about	I have no problems washing or dressing myself	I have no problems doing my usual activities	I have no pain or discomfort	I am not anxious or depressed	40	152	79	61	5.6	21.7		I have slight problems in walking about	I have severe problems washing or dressing myself	I am unable to do my usual activities	I have no pain or discomfort	I am not anxious or depressed	45	160	90	62	5.6	22.1
Male	31	not working	Single	Middle	Non smoker	No	No exercise	Low	Hepatitis	22.6	167	80	48	48	no	I have severe problems in walking about	I have no problems washing or dressing myself	I am unable to do my usual activities	I have moderate pain or discomfort	I am slightly anxious or depressed	60		I have slight problems in walking about	I have no problems washing or dressing myself	I have no problems doing my usual activities	I have no pain or discomfort	I am not anxious or depressed	65	195	101	66	5.8	22.1		I have slight problems in walking about	I have no problems washing or dressing myself	I am unable to do my usual activities	I have no pain or discomfort	I am not anxious or depressed	65	180	95	66	5.8	22.1
Female	49	not working	Married	Secondary	Non smoker	No	No exercise	Low	Hepatitis	21.1	169	92	102	78	no	I have moderate problems in walking about	I have no problems washing or dressing myself	I have severe problems doing my usual activities	I have no pain or discomfort	I am moderately anxious or depressed	70		I have slight problems in walking about	I have no problems washing or dressing myself	I have no problems doing my usual activities	I have no pain or discomfort	I am not anxious or depressed	60	153	88	62	5.7	21.4		I have slight problems in walking about	I have no problems washing or dressing myself	I am unable to do my usual activities	I have no pain or discomfort	I am not anxious or depressed	65	150	80	63	5.7	21.8
Female	65	Not capable of working	Married	Secondary	Non smoker	No	No exercise	Low	Diabetes mellitus, End stage renal disease	19.2	170	100	12	3	yes	I am unable to walk about	I am unable to wash or dress myself	I am unable to do my usual activities	I have no pain or discomfort	I am slightly anxious or depressed	40		I have slight problems in walking about	I have no problems washing or dressing myself	I have no problems doing my usual activities	I have no pain or discomfort	I am not anxious or depressed	45	170	100	55	5.6	19.6		I have slight problems in walking about	I have no problems washing or dressing myself	I am unable to do my usual activities	I have no pain or discomfort	I am not anxious or depressed	43	190	110	55	5.6	19.6
Female	52	Not capable of working	Married	Secondary	Ex-smoker	No	No exercise	Low	Diabetes mellitus	20	178	98	12	6	no	I have no problems in walking about	I have severe problems washing or dressing myself	I am unable to do my usual activities	I have no pain or discomfort	I am extremely anxious or depressed	60		I have no problems in walking about	I have no problems washing or dressing myself	I have no problems doing my usual activities	I have no pain or discomfort	I am not anxious or depressed	55	166	90	58	5.6	20		I have slight problems in walking about	I have no problems washing or dressing myself	I am unable to do my usual activities	I have no pain or discomfort	I am not anxious or depressed	58	155	85	57	5.6	20.3
Female	60	Not capable of working	Married	Not educated	Non smoker	No	No exercise	Low	Diabetes mellitus	27.6	165	62	180	4	no	I am unable to walk about	I am unable to wash or dress myself	I am unable to do my usual activities	I have severe pain or discomfort	I am slightly anxious or depressed	30		I have no problems in walking about	I have no problems washing or dressing myself	I have no problems doing my usual activities	I have no pain or discomfort	I am not anxious or depressed	30	175	78	65	5	28		I have slight problems in walking about	I have no problems washing or dressing myself	I am unable to do my usual activities	I have no pain or discomfort	I am not anxious or depressed	30	165	62	65	5	28
Male	28	Doing a job	Married	Secondary	Non smoker	No	No exercise	Low	Not any	28.8	170	90	36	5	no	I have no problems in walking about	I have no problems washing or dressing myself	I have severe problems doing my usual activities	I have severe pain or discomfort	I am severely anxious or depressed	60		I have no problems in walking about	I have no problems washing or dressing myself	I have no problems doing my usual activities	I have no pain or discomfort	I am not anxious or depressed	50	190	100	83.6	5.5	30.7		I have moderate problems in walking about	I have no problems washing or dressing myself	I am unable to do my usual activities	I have no pain or discomfort	I am not anxious or depressed	50	170	90	85	5.5	31.2
Male	45	Private business	Married	Graduate	Non smoker	No	No exercise	Low	Diabetes mellitus	27.5	170	90	3	3	no	I have slight problems in walking about	I have no problems washing or dressing myself	I have slight problems doing my usual activities	I have moderate pain or discomfort	I am severely anxious or depressed	60		I have no problems in walking about	I have no problems washing or dressing myself	I have no problems doing my usual activities	I have no pain or discomfort	I am not anxious or depressed	65	142	78	81	5.8	27.2		I have slight problems in walking about	I have no problems washing or dressing myself	I am unable to do my usual activities	I have no pain or discomfort	I am not anxious or depressed	65	160	97	80	5.8	26.6
Male	40	not working	Married	Not educated	Ex-smoker	No	No exercise	Low	Not any	18.1	150	100	30	30	no	I have slight problems in walking about	I have no problems washing or dressing myself	I have no problems doing my usual activities	I have no pain or discomfort	I am not anxious or depressed	90		I have no problems in walking about	I have no problems washing or dressing myself	I have no problems doing my usual activities	I have no pain or discomfort	I am not anxious or depressed	90	165	95	54	5.8	18.1		I have slight problems in walking about	I have no problems washing or dressing myself	I am unable to do my usual activities	I have no pain or discomfort	I am not anxious or depressed	90	170	100	54	5.8	18.1
Male	41	Not capable of working	Married	Primary	Non smoker	No	No exercise	Normal	Diabetes mellitus	23.5	140	73	10	10	no	I am unable to walk about	I am unable to wash or dress myself	I am unable to do my usual activities	I have no pain or discomfort	I am moderately anxious or depressed	30		I have moderate problems in walking about	I have severe problems washing or dressing myself	I am unable to do my usual activities	I have no pain or discomfort	I am not anxious or depressed	30	158	80	60	4.4	34.4		I have slight problems in walking about	I have no problems washing or dressing myself	I am unable to do my usual activities	I have no pain or discomfort	I am not anxious or depressed	35	150	80	60	4.4	34.4
Female	51	not working	Married	Middle	Non smoker	No	No exercise	Low	Hepatitis	24.2	190	84	36	36	yes	I have slight problems in walking about	I have no problems washing or dressing myself	I have no problems doing my usual activities	I have moderate pain or discomfort	I am not anxious or depressed	80		I have no problems in walking about	I have no problems washing or dressing myself	I have no problems doing my usual activities	I have moderate pain or discomfort	I am not anxious or depressed	75	163	70	48	4.8	23.7		I have slight problems in walking about	I have no problems washing or dressing myself	I am unable to do my usual activities	I have no pain or discomfort	I am not anxious or depressed	70	170	74	48	4.8	23.7
Male	38	not working	Married	Not educated	Non smoker	No	No exercise	Low	Diabetes mellitus	28.1	156	82	120	12	no	I have moderate problems in walking about	I have no problems washing or dressing myself	I have slight problems doing my usual activities	I have moderate pain or discomfort	I am not anxious or depressed	75		I am unable to walk about	I have no problems washing or dressing myself	I am unable to do my usual activities	I have severe pain or discomfort	I am not anxious or depressed	70	157	85	71	5.4	26.9		I have no problems in walking about	I have no problems washing or dressing myself	I am unable to do my usual activities	I have no pain or discomfort	I am not anxious or depressed	70	140	80	70	5.4	26.5
Male	34	Private business	Married	Middle	Non smoker	No	Daily	Low	Not any	26.9	170	84	96	36	yes	I have slight problems in walking about	I have no problems washing or dressing myself	I have no problems doing my usual activities	I have slight pain or discomfort	I am not anxious or depressed	85		I have slight problems in walking about	I have no problems washing or dressing myself	I have moderate problems doing my usual activities	I have slight pain or discomfort	I am not anxious or depressed	85	155	70	77	5.7	26.6		I have no problems in walking about	I have no problems washing or dressing myself	I am unable to do my usual activities	I have no pain or discomfort	I am not anxious or depressed	80	150	65	76	5.7	26.2
Male	34	Private business	Married	Middle	Non smoker	No	Daily	Low	Not any	26.9	170	84	96	36	yes	I have slight problems in walking about	I have no problems washing or dressing myself	I have no problems doing my usual activities	I have slight pain or discomfort	I am not anxious or depressed	85		I have moderate problems in walking about	I have no problems washing or dressing myself	I am unable to do my usual activities	I have severe pain or discomfort	I am not anxious or depressed	80	197	90	79	5.7	27.7		I have severe problems in walking about	I have no problems washing or dressing myself	I am unable to do my usual activities	I have no pain or discomfort	I am not anxious or depressed	80	190	75	79	5.7	27.7
Female	31	not working	Single	Graduate	Non smoker	No	No exercise	Low	Not any	22.5	182	105	48	36	yes	I have no problems in walking about	I have no problems washing or dressing myself	I have no problems doing my usual activities	I have moderate pain or discomfort	I am not anxious or depressed	90		I have severe problems in walking about	I have slight problems washing or dressing myself	I have severe problems doing my usual activities	I have extreme pain or discomfort	I am not anxious or depressed	85	160	80	71	5.1	29.6		I have severe problems in walking about	I have no problems washing or dressing myself	I am unable to do my usual activities	I have no pain or discomfort	I am not anxious or depressed	90	175	100	71	5.1	29.6
Male	40	Doing a job	Single	Middle	Ex-smoker	No	Daily	Low	Not any	23.8	174	82	36	36	no	I have slight problems in walking about	I have no problems washing or dressing myself	I have moderate problems doing my usual activities	I have moderate pain or discomfort	I am not anxious or depressed	60		I have severe problems in walking about	I have moderate problems washing or dressing myself	I have severe problems doing my usual activities	I have extreme pain or discomfort	I am not anxious or depressed	65	180	90	68	5.6	24.2		I have severe problems in walking about	I am unable to wash or dress myself	I am unable to do my usual activities	I have no pain or discomfort	I am not anxious or depressed	60	185	95	69	5.6	24.6
Female	30	Not capable of working	Single	Primary	Non smoker	No	No exercise	Low	Hepatitis	27.1	160	90	12	12	no	I have severe problems in walking about	I have severe problems washing or dressing myself	I have severe problems doing my usual activities	I have severe pain or discomfort	I am moderately anxious or depressed	45		I have severe problems in walking about	I have no problems washing or dressing myself	I have no problems doing my usual activities	I have extreme pain or discomfort	I am not anxious or depressed	40	170	78	50	4.6	26.6		I have severe problems in walking about	I am unable to wash or dress myself	I am unable to do my usual activities	I have no pain or discomfort	I am not anxious or depressed	40	150	98	50	4.6	26.6
Male	48	not working	Married	Secondary	Non smoker	No	No exercise	Normal	Hepatitis	22.7	134	81	120	12	no	I have slight problems in walking about	I have no problems washing or dressing myself	I have severe problems doing my usual activities	I have moderate pain or discomfort	I am not anxious or depressed	45		I am unable to walk about	I have no problems washing or dressing myself	I am unable to do my usual activities	I have extreme pain or discomfort	I am not anxious or depressed	45	185	97	61	5.5	22.4		I have severe problems in walking about	I am unable to wash or dress myself	I am unable to do my usual activities	I have no pain or discomfort	I am not anxious or depressed	40	164	110	61	5.5	22.4
Female	55	Not capable of working	Married	Secondary	Non smoker	No	No exercise	Normal	Diabetes mellitus, Hepatitis	22.1	150	90	24	12	yes	I have severe problems in walking about	I have no problems washing or dressing myself	I have moderate problems doing my usual activities	I have severe pain or discomfort	I am not anxious or depressed	50		I have slight problems in walking about	I have no problems washing or dressing myself	I have slight problems doing my usual activities	I have no pain or discomfort	I am not anxious or depressed	50	140	70	70	5.1	22.1		I have moderate problems in walking about	I have no problems washing or dressing myself	I am unable to do my usual activities	I have no pain or discomfort	I am not anxious or depressed	50	150	90	69	5.1	28.7
Male	55	Farmer	Married	Not educated	Ex-smoker	No	No exercise	Normal	Diabetes mellitus	15.8	140	90	6	72	no	I am unable to walk about	I am unable to wash or dress myself	I am unable to do my usual activities	I have severe pain or discomfort	I am not anxious or depressed	25		I have no problems in walking about	I have no problems washing or dressing myself	I have slight problems doing my usual activities	I have no pain or discomfort	I am not anxious or depressed	20	150	80	52	6	15.5		I have severe problems in walking about	I have no problems washing or dressing myself	I am unable to do my usual activities	I have no pain or discomfort	I am not anxious or depressed	20	147	87	52	6	15.5
Female	30	not working	Married	Secondary	Non smoker	No	No exercise	Normal	Not any	20.2	140	80	36	36	no	I have no problems in walking about	I have no problems washing or dressing myself	I have no problems doing my usual activities	I have slight pain or discomfort	I am not anxious or depressed	90		I have moderate problems in walking about	I have no problems washing or dressing myself	I have severe problems doing my usual activities	I have no pain or discomfort	I am not anxious or depressed	90	167	85	49	5.1	20.4		I have moderate problems in walking about	I have no problems washing or dressing myself	I am unable to do my usual activities	I have no pain or discomfort	I am not anxious or depressed	95	150	90	49	5.1	20.4
Male	24	not working	Married	Secondary	Non smoker	No	No exercise	Low	Not any	30.3	162	97	24	24	no	I have no problems in walking about	I have no problems washing or dressing myself	I have slight problems doing my usual activities	I have slight pain or discomfort	I am not anxious or depressed	80		I am unable to walk about	I have no problems washing or dressing myself	I am unable to do my usual activities	I have no pain or discomfort	I am not anxious or depressed	80	155	78	55	4.5	30.3		I have severe problems in walking about	I have no problems washing or dressing myself	I am unable to do my usual activities	I have no pain or discomfort	I am not anxious or depressed	75	145	90	56	4.5	30.9
Female	38	Private business	Married	Middle	Non smoker	No	No exercise	Normal	Not any	24.9	149	95	120	54	no	I have no problems in walking about	I have no problems washing or dressing myself	I have slight problems doing my usual activities	I have no pain or discomfort	I am moderately anxious or depressed	70		I am unable to walk about	I have no problems washing or dressing myself	I am unable to do my usual activities	I have no pain or discomfort	I am not anxious or depressed	70	180	98	69	5.6	24.6		I have severe problems in walking about	I have no problems washing or dressing myself	I am unable to do my usual activities	I have no pain or discomfort	I am not anxious or depressed	70	163	105	68	5.6	24.2
Male	41	not working	Married	Secondary	Non smoker	No	Daily	Normal	Not any	22.8	150	80	156	156	yes	I have slight problems in walking about	I have no problems washing or dressing myself	I have no problems doing my usual activities	I have slight pain or discomfort	I am not anxious or depressed	80		I have moderate problems in walking about	I have severe problems washing or dressing myself	I am unable to do my usual activities	I have no pain or discomfort	I am not anxious or depressed	80	158	85	64	5.6	22.8		I have severe problems in walking about	I have no problems washing or dressing myself	I am unable to do my usual activities	I have no pain or discomfort	I am not anxious or depressed	83	150	80	65	5.6	23.1
Male	30	not working	Married	Secondary	Non smoker	No	No exercise	Low	Cardio vascular disease	15.5	169	103	120	24	yes	I have severe problems in walking about	I have severe problems washing or dressing myself	I have severe problems doing my usual activities	I have severe pain or discomfort	I am extremely anxious or depressed	40		I am unable to walk about	I have no problems washing or dressing myself	I am unable to do my usual activities	I have no pain or discomfort	I am not anxious or depressed	45	175	90	41	5.4	15.5		I have severe problems in walking about	I have no problems washing or dressing myself	I am unable to do my usual activities	I have no pain or discomfort	I am not anxious or depressed	42	171	100	41	5.4	15.5
Male	29	not working	Married	Middle	Non smoker	No	Daily	Low	Not any	17	155	80	12	12	yes	I have no problems in walking about	I have no problems washing or dressing myself	I have no problems doing my usual activities	I have no pain or discomfort	I am slightly anxious or depressed	90		I am unable to walk about	I have no problems washing or dressing myself	I am unable to do my usual activities	I have severe pain or discomfort	I am not anxious or depressed	85	148	74	60	6.2	17		I have severe problems in walking about	I have no problems washing or dressing myself	I am unable to do my usual activities	I have no pain or discomfort	I am not anxious or depressed	87	140	75	60	6.2	17
Male	36	Not capable of working	Married	Graduate	Non smoker	No	No exercise	Low	Not any	21.8	175	100	48	48	no	I have slight problems in walking about	I have no problems washing or dressing myself	I have slight problems doing my usual activities	I have severe pain or discomfort	I am moderately anxious or depressed	60		I have moderate problems in walking about	I have no problems washing or dressing myself	I am unable to do my usual activities	I have severe pain or discomfort	I am not anxious or depressed	65	190	90	64	5.7	22.1		I have severe problems in walking about	I have no problems washing or dressing myself	I am unable to do my usual activities	I have no pain or discomfort	I am not anxious or depressed	63	185	108	65	5.7	22.4
Male	45	Private business	Married	Secondary	Non smoker	No	No exercise	Low	Diabetes mellitus	19.9	153	86	120	24	yes	I have moderate problems in walking about	I have no problems washing or dressing myself	I have no problems doing my usual activities	I have slight pain or discomfort	I am not anxious or depressed	75		I am unable to walk about	I have no problems washing or dressing myself	I am unable to do my usual activities	I have severe pain or discomfort	I am not anxious or depressed	70	150	70	52	5.3	20.3		I have severe problems in walking about	I have no problems washing or dressing myself	I am unable to do my usual activities	I have no pain or discomfort	I am not anxious or depressed	71	157	88	53	5.3	20.7
Male	34	not working	Married	Secondary	Non smoker	No	No exercise	Normal	Not any	19.3	141	80	48	48	yes	I have slight problems in walking about	I have no problems washing or dressing myself	I have no problems doing my usual activities	I have moderate pain or discomfort	I am moderately anxious or depressed	60		I have slight problems in walking about	I have no problems washing or dressing myself	I have moderate problems doing my usual activities	I have extreme pain or discomfort	I am not anxious or depressed	65	190	100	57	5.7	19.7		I am unable to walk about	I have no problems washing or dressing myself	I am unable to do my usual activities	I have no pain or discomfort	I am not anxious or depressed	60	170	100	57	5.7	19.7
Male	56	Not capable of working	Married	Secondary	Non smoker	No	No exercise	Normal	Diabetes mellitus	29.7	163	55	96	24	yes	I have slight problems in walking about	I have no problems washing or dressing myself	I have slight problems doing my usual activities	I have slight pain or discomfort	I am not anxious or depressed	60		I have severe problems in walking about	I have no problems washing or dressing myself	I have slight problems doing my usual activities	I have no pain or discomfort	I am not anxious or depressed	60	160	90	60	4.8	29.7		I have slight problems in walking about	I have no problems washing or dressing myself	I have moderate problems doing my usual activities	I have no pain or discomfort	I am not anxious or depressed	65	143	67	60	4.8	29.7
Male	47	Private business	Married	Graduate	Non smoker	No	Daily	Normal	Diabetes mellitus	26.8	140	80	54	12	no	I have moderate problems in walking about	I have no problems washing or dressing myself	I have no problems doing my usual activities	I have severe pain or discomfort	I am not anxious or depressed	70		I have slight problems in walking about	I have slight problems washing or dressing myself	I have severe problems doing my usual activities	I have no pain or discomfort	I am not anxious or depressed	65	145	70	79	5.8	26.5		I have moderate problems in walking about	I have no problems washing or dressing myself	I have severe problems doing my usual activities	I have no pain or discomfort	I am not anxious or depressed	73	150	80	78	5.8	26.1
Female	26	not working	Single	Higher secondary	Non smoker	No	No exercise	Normal	Not any	18.7	161	84	24	24	no	I have slight problems in walking about	I have no problems washing or dressing myself	I have slight problems doing my usual activities	I have severe pain or discomfort	I am not anxious or depressed	55		I have moderate problems in walking about	I have no problems washing or dressing myself	I have severe problems doing my usual activities	I have no pain or discomfort	I am not anxious or depressed	50	143	74	50	5.5	18.3		I have moderate problems in walking about	I have no problems washing or dressing myself	I have no problems doing my usual activities	I have no pain or discomfort	I am not anxious or depressed	52	155	81	50	5.5	18.3
Female	30	not working	Single	Secondary	Non smoker	No	No exercise	Low	Diabetes mellitus, Hepatitis	26.2	180	70	96	8	no	I have slight problems in walking about	I have no problems washing or dressing myself	I have severe problems doing my usual activities	I have slight pain or discomfort	I am slightly anxious or depressed	60		I have no problems in walking about	I have no problems washing or dressing myself	I have no problems doing my usual activities	I have no pain or discomfort	I am not anxious or depressed	55	171	86	64	5.1	26.7		I have moderate problems in walking about	I have no problems washing or dressing myself	I have no problems doing my usual activities	I have no pain or discomfort	I am not anxious or depressed	65	187	80	65	5.1	27.1
Female	53	Retired	Married	Higher secondary	Non smoker	No	No exercise	Low	Hepatitis	20	160	100	72	36	no	I have slight problems in walking about	I have no problems washing or dressing myself	I have moderate problems doing my usual activities	I have severe pain or discomfort	I am slightly anxious or depressed	70		I have slight problems in walking about	I have no problems washing or dressing myself	I have slight problems doing my usual activities	I have slight pain or discomfort	I am slightly anxious or depressed	73	170	96	46	5.4	17.4		I have moderate problems in walking about	I have slight problems washing or dressing myself	I have slight problems doing my usual activities	I have slight pain or discomfort	I am slightly anxious or depressed	75	155	98	45	5.4	17
Male	34		Married	Middle	Non smoker	No	No exercise	Low	Hepatitis	17.1	150	95	102	102	no	I have slight problems in walking about	I have no problems washing or dressing myself	I have moderate problems doing my usual activities	I have moderate pain or discomfort	I am extremely anxious or depressed	65		I have moderate problems in walking about	I have slight problems washing or dressing myself	I have moderate problems doing my usual activities	I have slight pain or discomfort	I am slightly anxious or depressed	78	160	87	47	5.5	17.2		I have moderate problems in walking about	I have slight problems washing or dressing myself	I have slight problems doing my usual activities	I have slight pain or discomfort	I am slightly anxious or depressed	68	148	95	47	5.5	17.2
Female	70	Not capable of working	Married	Not educated	Ex-smoker	No	No exercise	Normal	Hepatitis	23.4	180	90	18	8	no	I have severe problems in walking about	I have no problems washing or dressing myself	I have severe problems doing my usual activities	I have severe pain or discomfort	I am not anxious or depressed	40		I have moderate problems in walking about	I have slight problems washing or dressing myself	I have moderate problems doing my usual activities	I have slight pain or discomfort	I am slightly anxious or depressed	45	150	80	71	5.8	23.8		I have moderate problems in walking about	I have moderate problems washing or dressing myself	I have slight problems doing my usual activities	I have slight pain or discomfort	I am slightly anxious or depressed	44	170	90	72	5.8	24.1
Female	60		Married	Secondary	Non smoker	No	Daily	Low	Not any	19	180	80	4.5	30	no	I have moderate problems in walking about	I have no problems washing or dressing myself	I have severe problems doing my usual activities	I have slight pain or discomfort	I am extremely anxious or depressed	50		I have moderate problems in walking about	I have no problems washing or dressing myself	I have severe problems doing my usual activities	I have slight pain or discomfort	I am slightly anxious or depressed	55	185	90	43	5	18.5		I have severe problems in walking about	I have moderate problems washing or dressing myself	I have slight problems doing my usual activities	I have slight pain or discomfort	I am slightly anxious or depressed	52	175	80	43	5	18.5
Male	60	Not capable of working	Married	Secondary	Non smoker	No	Some times	Low	Diabetes mellitus	24.1	150	70	48	18	yes	I have severe problems in walking about	I have slight problems washing or dressing myself	I am unable to do my usual activities	I have severe pain or discomfort	I am extremely anxious or depressed	30		I have no problems in walking about	I have no problems washing or dressing myself	I have no problems doing my usual activities	I have slight pain or discomfort	I am slightly anxious or depressed	33	150	78	77	5.11	23.7		I have severe problems in walking about	I have severe problems washing or dressing myself	I have slight problems doing my usual activities	I have slight pain or discomfort	I am slightly anxious or depressed	35	140	70	77	5.11	23.7
Female	53	Doing a job	Married	Middle	Ex-smoker	No	No exercise	Low	Not any	20.7	150	90	120	24	yes	I have moderate problems in walking about	I have no problems washing or dressing myself	I have no problems doing my usual activities	I have moderate pain or discomfort	I am slightly anxious or depressed	60		I have no problems in walking about	I have no problems washing or dressing myself	I have no problems doing my usual activities	I have slight pain or discomfort	I am slightly anxious or depressed	65	160	80	63	5.8	21.1		I am unable to walk about	I have severe problems washing or dressing myself	I have slight problems doing my usual activities	I have slight pain or discomfort	I am slightly anxious or depressed	60	148	88	64	5.8	21.5
Female	27	Not capable of working	Single	Graduate	Non smoker	No	No exercise	Normal	Not any	19.1	180	120	168	18	yes	I have no problems in walking about	I have no problems washing or dressing myself	I have slight problems doing my usual activities	I have no pain or discomfort	I am not anxious or depressed	85		I have no problems in walking about	I have no problems washing or dressing myself	I have no problems doing my usual activities	I have slight pain or discomfort	I am slightly anxious or depressed	80	190	100	48	5.3	18.7		I have slight problems in walking about	I have no problems washing or dressing myself	I have slight problems doing my usual activities	I have slight pain or discomfort	I am slightly anxious or depressed	88	170	111	49	5.3	19.1
Female	50	Not capable of working	Married	Not educated	Non smoker	No	No exercise	Normal	Not any	24.3	140	90	18	18	no	I have no problems in walking about	I have no problems washing or dressing myself	I have slight problems doing my usual activities	I have slight pain or discomfort	I am extremely anxious or depressed	70		I have slight problems in walking about	I have no problems washing or dressing myself	I have slight problems doing my usual activities	I have slight pain or discomfort	I am slightly anxious or depressed	65	165	95	59	5.2	23.8		I have slight problems in walking about	I have no problems washing or dressing myself	I have slight problems doing my usual activities	I have slight pain or discomfort	I am slightly anxious or depressed	70	138	89	58	5.2	23.4
Male	66	Retired	Married	Secondary	Ex-smoker	No	Daily	Normal	Not any	31.4	162	94	72	60	no	I have moderate problems in walking about	I have no problems washing or dressing myself	I have moderate problems doing my usual activities	I have moderate pain or discomfort	I am slightly anxious or depressed	45		I have moderate problems in walking about	I have no problems washing or dressing myself	I have moderate problems doing my usual activities	I have moderate pain or discomfort	I am slightly anxious or depressed	50	150	80	93	5.8	31.2		I have slight problems in walking about	I have no problems washing or dressing myself	I have slight problems doing my usual activities	I have slight pain or discomfort	I am slightly anxious or depressed	47	160	90	92	5.8	30.8
Male	40	Not capable of working	Married	Not educated	Non smoker	No	Daily	Low	Not any	28.7	161	79	24	12	no	I have no problems in walking about	I have no problems washing or dressing myself	I have slight problems doing my usual activities	I have no pain or discomfort	I am not anxious or depressed	80		I have severe problems in walking about	I have no problems washing or dressing myself	I have moderate problems doing my usual activities	I have moderate pain or discomfort	I am slightly anxious or depressed	78	170	88	82	5.7	28.3		I have moderate problems in walking about	I have no problems washing or dressing myself	I have slight problems doing my usual activities	I have slight pain or discomfort	I am slightly anxious or depressed	80	155	80	82	5.7	28.3
Female	65	Not capable of working	Married	Primary	Non smoker	No	Some times	Normal	Cardio vascular disease, Diabetes mellitus	25.9	199	74	48	24	no	I have severe problems in walking about	I have severe problems washing or dressing myself	I am unable to do my usual activities	I have moderate pain or discomfort	I am moderately anxious or depressed	40		I have severe problems in walking about	I have slight problems washing or dressing myself	I have severe problems doing my usual activities	I have moderate pain or discomfort	I am slightly anxious or depressed	45	180	70	53.7	4.7	27.5		I have slight problems in walking about	I have no problems washing or dressing myself	I have slight problems doing my usual activities	I have slight pain or discomfort	I am slightly anxious or depressed	42	190	75	54	4.7	27.7
Female	75	Retired	Married	Middle	Ex-smoker	No	No exercise	Low	not any	26.2	170	63	24	24	no	I have moderate problems in walking about	I have no problems washing or dressing myself	I have slight problems doing my usual activities	I have slight pain or discomfort	I am not anxious or depressed	90		I have severe problems in walking about	I have slight problems washing or dressing myself	I have severe problems doing my usual activities	I have moderate pain or discomfort	I am slightly anxious or depressed	90	150	69	74.6	5.6	26.5		I have no problems in walking about	I have no problems washing or dressing myself	I have slight problems doing my usual activities	I have slight pain or discomfort	I am slightly anxious or depressed	90	168	65	75	5.6	26.7
Male	42	Not capable of working	Married	Middle	Smoker	No	No exercise	Low	Not any	20.8	158	98	48	36	yes	I have severe problems in walking about	I have moderate problems washing or dressing myself	I have no problems doing my usual activities	I have moderate pain or discomfort	I am moderately anxious or depressed	70		I have slight problems in walking about	I have no problems washing or dressing myself	I have severe problems doing my usual activities	I have moderate pain or discomfort	I am slightly anxious or depressed	75	170	100	61	5.7	21.1		I have no problems in walking about	I have no problems washing or dressing myself	I have slight problems doing my usual activities	I have slight pain or discomfort	I am slightly anxious or depressed	72	155	95	61	5.7	21.1
Female	45	Not capable of working	Married	Not educated	Non smoker	No	Some times	Low	Diabetes mellitus	29.8	154	69	120	12	no	I have slight problems in walking about	I have no problems washing or dressing myself	I have no problems doing my usual activities	I have slight pain or discomfort	I am not anxious or depressed	70		I have slight problems in walking about	I have no problems washing or dressing myself	I have severe problems doing my usual activities	I have moderate pain or discomfort	I am slightly anxious or depressed	70	157	73	60	4.8	29.8		I have slight problems in walking about	I have no problems washing or dressing myself	I have slight problems doing my usual activities	I have slight pain or discomfort	I am slightly anxious or depressed	70	150	70	59	4.8	29.2
Female	60	Not capable of working	Married	Not educated	Non smoker	No	No exercise	Low	Respiratory disorder	19.5	170	90	48	48	no	I have severe problems in walking about	I have moderate problems washing or dressing myself	I have severe problems doing my usual activities	I have severe pain or discomfort	I am extremely anxious or depressed	30		I have severe problems in walking about	I have slight problems washing or dressing myself	I have severe problems doing my usual activities	I have moderate pain or discomfort	I am slightly anxious or depressed	30	160	87	45	5	19.5		I have slight problems in walking about	I have no problems washing or dressing myself	I have slight problems doing my usual activities	I have slight pain or discomfort	I am slightly anxious or depressed	33	164	89	45	5	19.4
Female	61	Not capable of working	Married	Not educated	Non smoker	No	Daily	Low	Not any	36.7	140	80	18	18	yes	I have moderate problems in walking about	I have no problems washing or dressing myself	I have moderate problems doing my usual activities	I have severe pain or discomfort	I am not anxious or depressed	60		I have slight problems in walking about	I have no problems washing or dressing myself	I have severe problems doing my usual activities	I have moderate pain or discomfort	I am slightly anxious or depressed	60	150	80	74	4.8	36.7		I have slight problems in walking about	I have no problems washing or dressing myself	I have slight problems doing my usual activities	I have slight pain or discomfort	I am slightly anxious or depressed	62	139	80	73	4.8	36.1
Female	60	Not capable of working	Married	Not educated	Non smoker	No	No exercise	Low	Cardio vascular disease, Diabetes mellitus, Hepatitis	24.3	190	90	120	18	yes	I am unable to walk about	I am unable to wash or dress myself	I am unable to do my usual activities	I have slight pain or discomfort	I am extremely anxious or depressed	30		I have severe problems in walking about	I have no problems washing or dressing myself	I have no problems doing my usual activities	I have moderate pain or discomfort	I am slightly anxious or depressed	40	167	82	59.8	5.2	24.1		I have moderate problems in walking about	I have no problems washing or dressing myself	I have slight problems doing my usual activities	I have slight pain or discomfort	I am slightly anxious or depressed	35	180	88	59	5.2	23.8
Female	55	Not capable of working	Married	Not educated	Non smoker	No	No exercise	Normal	Diabetes mellitus, Hepatitis	20.9	150	90	48	6	no	I am unable to walk about	I am unable to wash or dress myself	I am unable to do my usual activities	I have slight pain or discomfort	I am not anxious or depressed	50		I have no problems in walking about	I have no problems washing or dressing myself	I am unable to do my usual activities	I have moderate pain or discomfort	I am slightly anxious or depressed	45	163	80	44	4.9	20.9		I have moderate problems in walking about	I have no problems washing or dressing myself	I have slight problems doing my usual activities	I have slight pain or discomfort	I am slightly anxious or depressed	53	148	87	44	4.9	20.9
Female	50	Not capable of working	Married	Primary	Non smoker	No	Daily	Low	Diabetes mellitus, Hepatitis	32.5	180	90	120	6	yes	I have slight problems in walking about	I have no problems washing or dressing myself	I have moderate problems doing my usual activities	I have slight pain or discomfort	I am moderately anxious or depressed	60		I have slight problems in walking about	I have no problems washing or dressing myself	I have slight problems doing my usual activities	I have severe pain or discomfort	I am slightly anxious or depressed	57	190	98	76	5	32.7		I have no problems in walking about	I have no problems washing or dressing myself	I have slight problems doing my usual activities	I have slight pain or discomfort	I am slightly anxious or depressed	62	176	89	76	5	32.7
Male	60	Not capable of working	Married	Not educated	Ex-smoker	No	No exercise	Low	Diabetes mellitus, Hepatitis	21.2	180	90	36	18	no	I am unable to walk about	I am unable to wash or dress myself	I am unable to do my usual activities	I have severe pain or discomfort	I am not anxious or depressed	60		I have moderate problems in walking about	I have no problems washing or dressing myself	I have slight problems doing my usual activities	I have severe pain or discomfort	I am slightly anxious or depressed	65	190	105	51	5.1	21.2		I have no problems in walking about	I have no problems washing or dressing myself	I have slight problems doing my usual activities	I have slight pain or discomfort	I am slightly anxious or depressed	66	170	86	51	5.1	21.2
Female	37	Doing a job	Married	Secondary	Ex-smoker	No	No exercise	Low	Not any	17.7	172	95	36	24	no	I have no problems in walking about	I have no problems washing or dressing myself	I have slight problems doing my usual activities	I have slight pain or discomfort	I am moderately anxious or depressed	50		I have moderate problems in walking about	I have slight problems washing or dressing myself	I have moderate problems doing my usual activities	I have severe pain or discomfort	I am slightly anxious or depressed	55	160	90	48.3	5.4	18.3		I have no problems in walking about	I have no problems washing or dressing myself	I have slight problems doing my usual activities	I have slight pain or discomfort	I am slightly anxious or depressed	54	168	94	49	5.4	18.5
Male	37	Doing a job	Married	Not educated	Ex-smoker	No	Daily	Normal	Not any	19.7	180	60	1	12	no	I have no problems in walking about	I have no problems washing or dressing myself	I have no problems doing my usual activities	I have slight pain or discomfort	I am not anxious or depressed	70		I have slight problems in walking about	I have no problems washing or dressing myself	I have moderate problems doing my usual activities	I have severe pain or discomfort	I am slightly anxious or depressed	65	178	75	64	5.11	19.7		I have no problems in walking about	I have no problems washing or dressing myself	I have slight problems doing my usual activities	I have slight pain or discomfort	I am slightly anxious or depressed	70	171	70	64	5.11	19.7
Female	61	Not capable of working	Married	Secondary	Non smoker	No	No exercise	Low	Diabetes mellitus	16.5	190	74	120	18	no	I have moderate problems in walking about	I have slight problems washing or dressing myself	I have severe problems doing my usual activities	I have slight pain or discomfort	I am moderately anxious or depressed	60		I have slight problems in walking about	I have no problems washing or dressing myself	I have moderate problems doing my usual activities	I have severe pain or discomfort	I am slightly anxious or depressed	60	200	100	45	5.5	16.5		I have slight problems in walking about	I have no problems washing or dressing myself	I have slight problems doing my usual activities	I have slight pain or discomfort	I am slightly anxious or depressed	63	180	75	46	5.5	16.9
Female	50	Not capable of working	Married	Secondary	Non smoker	No	No exercise	Low	Not any	24.2	153	67	24	12	no	I have moderate problems in walking about	I have severe problems washing or dressing myself	I am unable to do my usual activities	I have moderate pain or discomfort	I am moderately anxious or depressed	40		I have moderate problems in walking about	I have moderate problems washing or dressing myself	I have severe problems doing my usual activities	I have severe pain or discomfort	I am slightly anxious or depressed	45	140	80	55	5	23.7		I have moderate problems in walking about	I have no problems washing or dressing myself	I have slight problems doing my usual activities	I have slight pain or discomfort	I am slightly anxious or depressed	42	150	70	54	5	23.3
Female	25	Doing a job	Single	Graduate	Non smoker	No	Daily	Normal	Not any	21.2	140	80	12	12	no	I have slight problems in walking about	I have no problems washing or dressing myself	I have no problems doing my usual activities	I have no pain or discomfort	I am not anxious or depressed	90		I have severe problems in walking about	I have moderate problems washing or dressing myself	I have severe problems doing my usual activities	I have severe pain or discomfort	I am slightly anxious or depressed	90	159	96	51	5.1	21.2		I have moderate problems in walking about	I have no problems washing or dressing myself	I have slight problems doing my usual activities	I have slight pain or discomfort	I am slightly anxious or depressed	90	139	81	50	5.1	20.8
Male	29	Doing a job	Single	Secondary	Non smoker	No	Daily	Low	Hepatitis	20.1	180	107	36	24	no	I have no problems in walking about	I have no problems washing or dressing myself	I have no problems doing my usual activities	I have moderate pain or discomfort	I am slightly anxious or depressed	70		I have no problems in walking about	I have no problems washing or dressing myself	I have no problems doing my usual activities	I have severe pain or discomfort	I am slightly anxious or depressed	65	158	80	57.6	5.7	19.9		I have severe problems in walking about	I have no problems washing or dressing myself	I have slight problems doing my usual activities	I have slight pain or discomfort	I am slightly anxious or depressed	70	176	100	57	5.7	19.7
Female	37	Not capable of working	Married	Primary	Non smoker	No	Some times	Low	Not any	32.9	140	103	12	1	no	I have no problems in walking about	I have no problems washing or dressing myself	I have no problems doing my usual activities	I have no pain or discomfort	I am not anxious or depressed	95		I have severe problems in walking about	I have slight problems washing or dressing myself	I am unable to do my usual activities	I have severe pain or discomfort	I am slightly anxious or depressed	95	168	100	76	5	32.9		I have severe problems in walking about	I have no problems washing or dressing myself	I have slight problems doing my usual activities	I have slight pain or discomfort	I am slightly anxious or depressed	95	138	90	76	5	32.9
Male	53	Retired	Married	Secondary	Ex-smoker	No	No exercise	Normal	Diabetes mellitus, Hepatitis	22.4	150	90	24	12	no	I have severe problems in walking about	I have moderate problems washing or dressing myself	I am unable to do my usual activities	I have severe pain or discomfort	I am moderately anxious or depressed	50		I have severe problems in walking about	I have severe problems washing or dressing myself	I am unable to do my usual activities	I have severe pain or discomfort	I am slightly anxious or depressed	55	155	90	76	6	22.7		I have severe problems in walking about	I have no problems washing or dressing myself	I have moderate problems doing my usual activities	I have slight pain or discomfort	I am slightly anxious or depressed	54	145	88	76	6	22.7
Male	50	Not capable of working	Married	Middle	Ex-smoker	No	Daily	Low	Paralysis	19	200	100	120	18	yes	I have moderate problems in walking about	I have moderate problems washing or dressing myself	I am unable to do my usual activities	I have severe pain or discomfort	I am not anxious or depressed	50		I have severe problems in walking about	I have no problems washing or dressing myself	I am unable to do my usual activities	I have severe pain or discomfort	I am slightly anxious or depressed	55	170	76	51	5.7	18.3		I have severe problems in walking about	I am unable to wash or dress myself	I have moderate problems doing my usual activities	I have slight pain or discomfort	I am slightly anxious or depressed	52	190	96	52	5.7	18
Male	63	Not capable of working	Married	Higher secondary	Ex-smoker	No	No exercise	Normal	Diabetes mellitus	23.3	180	90	60	60	no	I have moderate problems in walking about	I have no problems washing or dressing myself	I have severe problems doing my usual activities	I have moderate pain or discomfort	I am not anxious or depressed	60		I am unable to walk about	I have no problems washing or dressing myself	I am unable to do my usual activities	I have severe pain or discomfort	I am slightly anxious or depressed	60	187	98	77	6	23		I am unable to walk about	I am unable to wash or dress myself	I have moderate problems doing my usual activities	I have slight pain or discomfort	I am slightly anxious or depressed	65	171	87	76	6	22.7
Female	40	Not capable of working	Married	Not educated	Non smoker	No	Daily	Low	Not any	18.6	140	85	18	18	no	I have severe problems in walking about	I have moderate problems washing or dressing myself	I am unable to do my usual activities	I have severe pain or discomfort	I am slightly anxious or depressed	70		I am unable to walk about	I have no problems washing or dressing myself	I am unable to do my usual activities	I have severe pain or discomfort	I am slightly anxious or depressed	75	170	93	43	5	18.6		I am unable to walk about	I am unable to wash or dress myself	I have moderate problems doing my usual activities	I have slight pain or discomfort	I am moderately anxious or depressed	73	136	83	43	5	18.6
Female	37	Not capable of working	Married	Primary	Non smoker	No	Some times	Low	Not any	32.9	140	103	12	1	no	I have no problems in walking about	I have no problems washing or dressing myself	I have no problems doing my usual activities	I have no pain or discomfort	I am not anxious or depressed	95		I have slight problems in walking about	I have no problems washing or dressing myself	I have slight problems doing my usual activities	I have slight pain or discomfort	I am moderately anxious or depressed	95	148	90	76	5	32.9		I am unable to walk about	I am unable to wash or dress myself	I have moderate problems doing my usual activities	I have slight pain or discomfort	I am moderately anxious or depressed	95	138	100	77	5	33.2
Male	69	Retired	Married	Graduate	Ex-smoker	No	Some times	Normal	Hepatitis	19.9	140	90	96	96	no	I have moderate problems in walking about	I have no problems washing or dressing myself	I have slight problems doing my usual activities	I have moderate pain or discomfort	I am extremely anxious or depressed	60		I have moderate problems in walking about	I have no problems washing or dressing myself	I have slight problems doing my usual activities	I have slight pain or discomfort	I am moderately anxious or depressed	55	145	80	62	5.9	20.2		I am unable to walk about	I am unable to wash or dress myself	I have moderate problems doing my usual activities	I have slight pain or discomfort	I am moderately anxious or depressed	62	137	87	63	5.9	20.5
Male	44	Doing a job	Married	Middle	Non smoker	No	Some times	Normal	Not any	18.7	185	91	24	24	yes	I have moderate problems in walking about	I have no problems washing or dressing myself	I have no problems doing my usual activities	I have slight pain or discomfort	I am slightly anxious or depressed	50		I have no problems in walking about	I have no problems washing or dressing myself	I have slight problems doing my usual activities	I have slight pain or discomfort	I am moderately anxious or depressed	55	160	85	64	6.1	18.7		I have moderate problems in walking about	I have slight problems washing or dressing myself	I have moderate problems doing my usual activities	I have slight pain or discomfort	I am moderately anxious or depressed	60	180	90	64	6.1	18.7
Male	52	Doing a job	Married	Graduate	Non smoker	No	No exercise	Low	Not any	41.8	222	86	60	60	no	I have severe problems in walking about	I have slight problems washing or dressing myself	I have moderate problems doing my usual activities	I have moderate pain or discomfort	I am not anxious or depressed	40		I have slight problems in walking about	I have no problems washing or dressing myself	I have no problems doing my usual activities	I have slight pain or discomfort	I am moderately anxious or depressed	45	185	97	124	5.8	41.6		I have moderate problems in walking about	I have moderate problems washing or dressing myself	I have moderate problems doing my usual activities	I have slight pain or discomfort	I am moderately anxious or depressed	48	200	84	122	5.8	40.9
Male	63	Retired	Married	Secondary	Non smoker	No	Daily	Normal	Not any	22.2	170	90	120	96	no	I have moderate problems in walking about	I have no problems washing or dressing myself	I have no problems doing my usual activities	I have moderate pain or discomfort	I am slightly anxious or depressed	50		I have slight problems in walking about	I have no problems washing or dressing myself	I have no problems doing my usual activities	I have slight pain or discomfort	I am moderately anxious or depressed	45	180	100	69	5.9	22.5		I have severe problems in walking about	I have moderate problems washing or dressing myself	I have moderate problems doing my usual activities	I have slight pain or discomfort	I am moderately anxious or depressed	55	165	86	70	5.9	22.8
Female	31	Not capable of working	Married	Secondary	Non smoker	No	No exercise	Normal	Not any	17.4	160	90	120	120	yes	I have moderate problems in walking about	I have no problems washing or dressing myself	I have moderate problems doing my usual activities	I have moderate pain or discomfort	I am not anxious or depressed	60		I have slight problems in walking about	I have no problems washing or dressing myself	I have no problems doing my usual activities	I have slight pain or discomfort	I am moderately anxious or depressed	55	160	85	43	5.2	17.4		I have severe problems in walking about	I have severe problems washing or dressing myself	I have moderate problems doing my usual activities	I have slight pain or discomfort	I am moderately anxious or depressed	60	155	88	42	5.2	16.9
Male	75	Not capable of working	Married	Middle	Non smoker	No	No exercise	Normal	Cardio vascular disease, Diabetes mellitus	30.5	140	80	180	30	yes	I have severe problems in walking about	I am unable to wash or dress myself	I have severe problems doing my usual activities	I have severe pain or discomfort	I am extremely anxious or depressed	40		I have slight problems in walking about	I have no problems washing or dressing myself	I have no problems doing my usual activities	I have slight pain or discomfort	I am moderately anxious or depressed	50	155	90	77.7	5.3	30.3		I have slight problems in walking about	I have no problems washing or dressing myself	I have moderate problems doing my usual activities	I have slight pain or discomfort	I am moderately anxious or depressed	45	140	80	77	5.3	30.1
Male	22	Doing a job	Single	Secondary	Non smoker	No	No exercise	Low	Not any	20.7	140	70	24	6	no	I have no problems in walking about	I have no problems washing or dressing myself	I have no problems doing my usual activities	I have moderate pain or discomfort	I am not anxious or depressed	90		I have no problems in walking about	I have no problems washing or dressing myself	I have no problems doing my usual activities	I have slight pain or discomfort	I am moderately anxious or depressed	87	158	78	54	5.3	21.1		I have slight problems in walking about	I have no problems washing or dressing myself	I have moderate problems doing my usual activities	I have slight pain or discomfort	I am moderately anxious or depressed	90	138	70	54	5.3	21.1
Female	64	Not capable of working	Married	Higher secondary	Non smoker	No	No exercise	Low	Diabetes mellitus	26.3	188	90	180	6	no	I am unable to walk about	I am unable to wash or dress myself	I am unable to do my usual activities	I have severe pain or discomfort	I am slightly anxious or depressed	40		I have no problems in walking about	I have no problems washing or dressing myself	I have no problems doing my usual activities	I have slight pain or discomfort	I am moderately anxious or depressed	45	190	100	70	5.4	26.3		I have slight problems in walking about	I have no problems washing or dressing myself	I have moderate problems doing my usual activities	I have moderate pain or discomfort	I am moderately anxious or depressed	46	182	89	70	5.4	26.3
Female	62	Not capable of working	Married	Not educated	Non smoker	No	No exercise	Normal	Not any	17.3	188	85	120	6	no	I have severe problems in walking about	I have slight problems washing or dressing myself	I have severe problems doing my usual activities	I have severe pain or discomfort	I am moderately anxious or depressed	30		I have moderate problems in walking about	I have no problems washing or dressing myself	I have slight problems doing my usual activities	I have slight pain or discomfort	I am moderately anxious or depressed	45	195	90	45.5	5.4	17.2		I have moderate problems in walking about	I have no problems washing or dressing myself	I have moderate problems doing my usual activities	I have moderate pain or discomfort	I am moderately anxious or depressed	40	185	85	45	5.4	17
Male	35	Doing a job	Married	Middle	Non smoker	No	Daily	Low	Hepatitis	20.7	180	90	3	6	no	I have severe problems in walking about	I have slight problems washing or dressing myself	I have severe problems doing my usual activities	I have slight pain or discomfort	I am not anxious or depressed	40		I have severe problems in walking about	I have no problems washing or dressing myself	I have slight problems doing my usual activities	I have moderate pain or discomfort	I am moderately anxious or depressed	36	160	75	54	5.3	21.1		I have severe problems in walking about	I have no problems washing or dressing myself	I have moderate problems doing my usual activities	I have moderate pain or discomfort	I am moderately anxious or depressed	44	176	87	55	5.3	21.5
Male	39	Not capable of working	Married	Graduate	Non smoker	No	No exercise	Low	Hepatitis, TB	17.3	150	80	48	12	no	I have severe problems in walking about	I have slight problems washing or dressing myself	I have severe problems doing my usual activities	I have severe pain or discomfort	I am moderately anxious or depressed	50		I have moderate problems in walking about	I have slight problems washing or dressing myself	I have moderate problems doing my usual activities	I have moderate pain or discomfort	I am moderately anxious or depressed	55	155	80	50	5.7	17.3		I have severe problems in walking about	I have no problems washing or dressing myself	I have moderate problems doing my usual activities	I have moderate pain or discomfort	I am moderately anxious or depressed	56	147	80	50	5.7	17.3
Female	60	Not capable of working	Married	Not educated	Non smoker	No	No exercise	Normal	Hepatitis	17.5	150	80	84	60	no	I have severe problems in walking about	I have moderate problems washing or dressing myself	I have moderate problems doing my usual activities	I have severe pain or discomfort	I am moderately anxious or depressed	40		I have moderate problems in walking about	I have slight problems washing or dressing myself	I have moderate problems doing my usual activities	I have moderate pain or discomfort	I am moderately anxious or depressed	45	160	88	42	5.1	17.5		I have no problems in walking about	I have no problems washing or dressing myself	I have moderate problems doing my usual activities	I have moderate pain or discomfort	I am moderately anxious or depressed	48	149	80	43	5.1	17.9
Male	20	Not capable of working	Single	Secondary	Non smoker	No	Daily	Low	Hepatitis	22.5	130	80	48	48	no	I have severe problems in walking about	I have no problems washing or dressing myself	I have severe problems doing my usual activities	I have moderate pain or discomfort	I am moderately anxious or depressed	40		I have severe problems in walking about	I have moderate problems washing or dressing myself	I have moderate problems doing my usual activities	I have moderate pain or discomfort	I am moderately anxious or depressed	50	140	82	54.5	5.1	22.7		I have no problems in walking about	I have no problems washing or dressing myself	I have moderate problems doing my usual activities	I have moderate pain or discomfort	I am moderately anxious or depressed	45	130	80	55	5.1	22.9
Male	32	Not capable of working	Married	Middle	Non smoker	No	Daily	Normal	Not any	18.5	190	80	24	24	no	I have no problems in walking about	I have no problems washing or dressing myself	I have severe problems doing my usual activities	I have no pain or discomfort	I am not anxious or depressed	60		I have slight problems in walking about	I have no problems washing or dressing myself	I have moderate problems doing my usual activities	I have moderate pain or discomfort	I am moderately anxious or depressed	60	167	68	52	5.6	18.5		I have no problems in walking about	I have no problems washing or dressing myself	I have moderate problems doing my usual activities	I have moderate pain or discomfort	I am moderately anxious or depressed	60	187	80	51	5.6	18.1
Female	35	Not capable of working	Married	Secondary	Non smoker	No	No exercise		Not any	21.1	150	90	180	24	no	I have severe problems in walking about	I have no problems washing or dressing myself	I have severe problems doing my usual activities	I have slight pain or discomfort	I am not anxious or depressed	70		I have moderate problems in walking about	I have no problems washing or dressing myself	I have moderate problems doing my usual activities	I have moderate pain or discomfort	I am moderately anxious or depressed	70	160	95	49	5	21.1		I have no problems in walking about	I have no problems washing or dressing myself	I have moderate problems doing my usual activities	I have moderate pain or discomfort	I am moderately anxious or depressed	70	148	88	49	5	21.1
Male	31	Doing a job	Single	Secondary	Ex-smoker	No	Daily	Low	Hepatitis	22.8	169	90	48	24	yes	I have slight problems in walking about	I have no problems washing or dressing myself	I have no problems doing my usual activities	I have moderate pain or discomfort	I am moderately anxious or depressed	50		I have moderate problems in walking about	I have severe problems washing or dressing myself	I have severe problems doing my usual activities	I have moderate pain or discomfort	I am moderately anxious or depressed	55	170	90	66	5.7	22.8		I have slight problems in walking about	I have no problems washing or dressing myself	I have moderate problems doing my usual activities	I have moderate pain or discomfort	I am moderately anxious or depressed	59	165	87	65.5	5.7	22.8
Male	50	Retired	Married	Secondary	Ex-smoker	No	Some times	Low	Hepatitis	22.4	160	70	60	36	no	I have severe problems in walking about	I have severe problems washing or dressing myself	I have moderate problems doing my usual activities	I have slight pain or discomfort	I am not anxious or depressed	60		I have slight problems in walking about	I have no problems washing or dressing myself	I have severe problems doing my usual activities	I have moderate pain or discomfort	I am moderately anxious or depressed	60	145	60	63	5.6	22.4		I have slight problems in walking about	I have no problems washing or dressing myself	I have moderate problems doing my usual activities	I have moderate pain or discomfort	I am moderately anxious or depressed	60	156	70	63	5.6	22.4
Female	48	Housewife	Married	Not educated	Non smoker	No	Daily	Low	Diabetes mellitus, Hepatitis	24.6	140	70	24	12	no	I have moderate problems in walking about	I have moderate problems washing or dressing myself	I have moderate problems doing my usual activities	I have severe pain or discomfort	I am extremely anxious or depressed	60		I have moderate problems in walking about	I have no problems washing or dressing myself	I have severe problems doing my usual activities	I have moderate pain or discomfort	I am moderately anxious or depressed	63	157	78	59	5.1	24.6		I have moderate problems in walking about	I have no problems washing or dressing myself	I have moderate problems doing my usual activities	I have moderate pain or discomfort	I am moderately anxious or depressed	66	137	70	59	5.1	25
Female	35	Not capable of working	Married	Not educated	Non smoker	No	No exercise	Normal	Not any	28.6	159	101	72	48	yes	I have no problems in walking about	I have no problems washing or dressing myself	I have slight problems doing my usual activities	I have slight pain or discomfort	I am not anxious or depressed	90		I have slight problems in walking about	I have no problems washing or dressing myself	I have no problems doing my usual activities	I have moderate pain or discomfort	I am moderately anxious or depressed	90	140	80	59	4.9	28.1		I have moderate problems in walking about	I have no problems washing or dressing myself	I have moderate problems doing my usual activities	I have moderate pain or discomfort	I am moderately anxious or depressed	90	155	98	58	4.9	25
Female	47	Housewife	Married	Not educated	Non smoker	No	No exercise	Low	Not any	22.7	140	70	180	24	no	I have severe problems in walking about	I have moderate problems washing or dressing myself	I am unable to do my usual activities	I have severe pain or discomfort	I am moderately anxious or depressed	40		I have slight problems in walking about	I have no problems washing or dressing myself	I have no problems doing my usual activities	I have moderate pain or discomfort	I am moderately anxious or depressed	45	160	90	46	4.8	22.7		I have severe problems in walking about	I have no problems washing or dressing myself	I have moderate problems doing my usual activities	I have moderate pain or discomfort	I am moderately anxious or depressed	50	138	70	46	4.8	22.7
Male	43	Private business	Married	Secondary	Non smoker	No	No exercise	Low	Not any	20.2	175	93	36	6	yes	I have severe problems in walking about	I have no problems washing or dressing myself	I have severe problems doing my usual activities	I have severe pain or discomfort	I am extremely anxious or depressed	50		I have no problems in walking about	I have no problems washing or dressing myself	I have no problems doing my usual activities	I have moderate pain or discomfort	I am moderately anxious or depressed	55	190	11`0	55.7	5.5	20.4		I have no problems in walking about	I have no problems washing or dressing myself	I have moderate problems doing my usual activities	I have moderate pain or discomfort	I am moderately anxious or depressed	57	170	93	56	5.5	20.5
Female	35	No working	Married	Not educated	Non smoker	No	Daily	Low	Not any	23.8	157	73	120	12	yes	I have slight problems in walking about	I have no problems washing or dressing myself	I have no problems doing my usual activities	I have slight pain or discomfort	I am moderately anxious or depressed	60		I have no problems in walking about	I have no problems washing or dressing myself	I am unable to do my usual activities	I have moderate pain or discomfort	I am moderately anxious or depressed	60	167	85	60	5.2	24.2		I have no problems in walking about	I have no problems washing or dressing myself	I have severe problems doing my usual activities	I have moderate pain or discomfort	I am moderately anxious or depressed	65	155	73	60	5.2	24.2
Female	55	Housewife	Married	Middle	Non smoker	No	Some times	Normal	Not any	22.8	150	70	264	12	yes	I have no problems in walking about	I have no problems washing or dressing myself	I have no problems doing my usual activities	I have moderate pain or discomfort	I am not anxious or depressed	80		I have slight problems in walking about	I have no problems washing or dressing myself	I have slight problems doing my usual activities	I have severe pain or discomfort	I am moderately anxious or depressed	80	160	75	63	5.6	22.4		I have no problems in walking about	I have no problems washing or dressing myself	I have severe problems doing my usual activities	I have moderate pain or discomfort	I am moderately anxious or depressed	80	150	70	62	5.6	22.1
Male	59	Not capable of working	Married	Secondary	Non smoker	No	Daily	Normal	Diabetes mellitus	21.8	146	60	300	36	yes	I have moderate problems in walking about	I have slight problems washing or dressing myself	I have moderate problems doing my usual activities	I have slight pain or discomfort	I am slightly anxious or depressed	70		I have slight problems in walking about	I have no problems washing or dressing myself	I have slight problems doing my usual activities	I have severe pain or discomfort	I am moderately anxious or depressed	65	155	70	63	5.7	21.8		I have no problems in walking about	I have no problems washing or dressing myself	I have severe problems doing my usual activities	I have moderate pain or discomfort	I am moderately anxious or depressed	70	146	60	63	5.7	21.8
Male	59	Not capable of working	Married	Secondary	Non smoker	No	Daily	Normal	Diabetes mellitus	21.8	146	60	300	36	yes	I have moderate problems in walking about	I have slight problems washing or dressing myself	I have moderate problems doing my usual activities	I have slight pain or discomfort	I am slightly anxious or depressed	70		I have no problems in walking about	I have no problems washing or dressing myself	I have slight problems doing my usual activities	I have severe pain or discomfort	I am moderately anxious or depressed	65	155	70	63	5.7	21.8		I have no problems in walking about	I have no problems washing or dressing myself	I have severe problems doing my usual activities	I have moderate pain or discomfort	I am moderately anxious or depressed	70	146	60	63	5.7	21.8
Female	32	Not capable of working	Single	Secondary	Non smoker	No	Some times	Normal	Not any	21.8	180	100	12	30	no	I have moderate problems in walking about	I have no problems washing or dressing myself	I have no problems doing my usual activities	I have slight pain or discomfort	I am slightly anxious or depressed	80		I have slight problems in walking about	I have no problems washing or dressing myself	I have moderate problems doing my usual activities	I have severe pain or discomfort	I am moderately anxious or depressed	80	183	103	61.9	5.7	21.4		I have moderate problems in walking about	I have no problems washing or dressing myself	I have severe problems doing my usual activities	I have moderate pain or discomfort	I am moderately anxious or depressed	80	175	97	61	5.7	21.1
Male	36	Not capable of working	Married	Not educated	Non smoker	No	No exercise	Normal	Hepatitis	22.8	150	70	24	24	no	I have moderate problems in walking about	I have slight problems washing or dressing myself	I have severe problems doing my usual activities	I have moderate pain or discomfort	I am moderately anxious or depressed	50		I have slight problems in walking about	I have no problems washing or dressing myself	I have moderate problems doing my usual activities	I have severe pain or discomfort	I am moderately anxious or depressed	55	170	95	66	5.7	22.8		I have moderate problems in walking about	I have no problems washing or dressing myself	I have severe problems doing my usual activities	I have moderate pain or discomfort	I am moderately anxious or depressed	54	147	70	66	5.7	22.8
Male	39	Not capable of working	Married	Not educated	Non smoker	No	No exercise	Low	Not any	18.2	140	80	120	1	no	I have slight problems in walking about	I have no problems washing or dressing myself	I have moderate problems doing my usual activities	I have severe pain or discomfort	I am moderately anxious or depressed	50		I have moderate problems in walking about	I have no problems washing or dressing myself	I have moderate problems doing my usual activities	I have severe pain or discomfort	I am moderately anxious or depressed	60	160	85	48	5.4	18.2		I have moderate problems in walking about	I have no problems washing or dressing myself	I have severe problems doing my usual activities	I have moderate pain or discomfort	I am moderately anxious or depressed	58	140	80	49	5.4	18.5
Male	32	Not capable of working	Married	Secondary	Non smoker	No	Daily	Low	Hepatitis	19.6	175	107	24	24	no	I have moderate problems in walking about	I have no problems washing or dressing myself	I have no problems doing my usual activities	I have severe pain or discomfort	I am not anxious or depressed	65		I have severe problems in walking about	I have moderate problems washing or dressing myself	I have severe problems doing my usual activities	I have severe pain or discomfort	I am moderately anxious or depressed	70	155	90	55	5.6	19.6		I have severe problems in walking about	I have no problems washing or dressing myself	I have severe problems doing my usual activities	I have moderate pain or discomfort	I am moderately anxious or depressed	70	170	103	55	5.6	19.6
Male	45	Not capable of working	Married	Secondary	Non smoker	No	No exercise	Normal	Diabetes mellitus, Hepatitis	26.8	152	71	108	36	no	I am unable to walk about	I have moderate problems washing or dressing myself	I am unable to do my usual activities	I have moderate pain or discomfort	I am not anxious or depressed	30		I have severe problems in walking about	I have severe problems washing or dressing myself	I have severe problems doing my usual activities	I have severe pain or discomfort	I am moderately anxious or depressed	35	173	78	72.4	5.5	26.6		I have no problems in walking about	I have no problems washing or dressing myself	I have severe problems doing my usual activities	I have moderate pain or discomfort	I am moderately anxious or depressed	40	150	71	72	5.5	26.4
Male	45	Not capable of working	Married	Not educated	Non smoker	No	No exercise	Normal	Hepatitis	17.9	157	90	36	12	no	I have severe problems in walking about	I have moderate problems washing or dressing myself	I have severe problems doing my usual activities	I have moderate pain or discomfort	I am not anxious or depressed	50		I have moderate problems in walking about	I have no problems washing or dressing myself	I have severe problems doing my usual activities	I have severe pain or discomfort	I am moderately anxious or depressed	53	164	80	54	5.9	17.6		I have no problems in walking about	I have no problems washing or dressing myself	I have severe problems doing my usual activities	I have moderate pain or discomfort	I am moderately anxious or depressed	58	154	90	54	5.9	17.6
Male	40	Not capable of working	Married	Middle	Smoker	No	Some times	Low	Hepatitis	30.8	200	95	1	12	yes	I have moderate problems in walking about	I have no problems washing or dressing myself	I have no problems doing my usual activities	I have severe pain or discomfort	I am extremely anxious or depressed	45		I have severe problems in walking about	I have no problems washing or dressing myself	I have severe problems doing my usual activities	I have severe pain or discomfort	I am moderately anxious or depressed	50	188	88	74	5.1	30.8		I have severe problems in walking about	I am unable to wash or dress myself	I have severe problems doing my usual activities	I have moderate pain or discomfort	I am moderately anxious or depressed	50	192	93	74	5.1	30.8
Male	72	Not capable of working	Married	Primary	Ex-smoker	No	No exercise	Low	Hepatitis	25.3	153	82	84	36	no	I have severe problems in walking about	I am unable to wash or dress myself	I am unable to do my usual activities	I have severe pain or discomfort	I am extremely anxious or depressed	35		I have severe problems in walking about	I have no problems washing or dressing myself	I have severe problems doing my usual activities	I have severe pain or discomfort	I am moderately anxious or depressed	35	170	80	70.5	5.6	25.1		I have moderate problems in walking about	I have slight problems washing or dressing myself	I have severe problems doing my usual activities	I have moderate pain or discomfort	I am moderately anxious or depressed	39	151	81	70	5.6	24.9
Female	70	Not capable of working	Married	Not educated	Non smoker	No	No exercise	Normal	Hepatitis	20.7	169	77	3	96	no	I have moderate problems in walking about	I have severe problems washing or dressing myself	I have severe problems doing my usual activities	I have extreme pain or discomfort	I am extremely anxious or depressed	30		I have severe problems in walking about	I have no problems washing or dressing myself	I have severe problems doing my usual activities	I have severe pain or discomfort	I am moderately anxious or depressed	35	170	82	53	5.3	20.7		I have no problems in walking about	I have slight problems washing or dressing myself	I have severe problems doing my usual activities	I have moderate pain or discomfort	I am moderately anxious or depressed	40	164	74	53	5.3	20.7
Male	51	Not capable of working	Married	Not educated	Ex-smoker	No	No exercise	Low	Cardio vascular disease	23	148	60	48	1	no	I have moderate problems in walking about	I have moderate problems washing or dressing myself	I have moderate problems doing my usual activities	I have moderate pain or discomfort	I am not anxious or depressed	50		I have moderate problems in walking about	I have no problems washing or dressing myself	I have severe problems doing my usual activities	I have severe pain or discomfort	I am moderately anxious or depressed	55	140	62	76.5	6	22.9		I have slight problems in walking about	I have slight problems washing or dressing myself	I have severe problems doing my usual activities	I have moderate pain or discomfort	I am moderately anxious or depressed	54	147	70	76	6	22.7
Male	58	Private business	Married	Middle	Non smoker	No	No exercise	Low	Diabetes mellitus	24	154	74	36	12	no	I have slight problems in walking about	I have no problems washing or dressing myself	I have slight problems doing my usual activities	I have no pain or discomfort	I am not anxious or depressed	70		I have slight problems in walking about	I have no problems washing or dressing myself	I have no problems doing my usual activities	I have severe pain or discomfort	I am moderately anxious or depressed	80	160	80	87	6.3	24		I have moderate problems in walking about	I have slight problems washing or dressing myself	I have severe problems doing my usual activities	I have moderate pain or discomfort	I am moderately anxious or depressed	75	153	74	87	6.3	24
Female	62	not working	Married	Higher secondary	Non smoker	No	No exercise	Low	Not any	22.1	178	71	24	15	yes	I have severe problems in walking about	I have severe problems washing or dressing myself	I am unable to do my usual activities	I have moderate pain or discomfort	I am severely anxious or depressed	70		I have severe problems in walking about	I have no problems washing or dressing myself	I have no problems doing my usual activities	I have severe pain or discomfort	I am moderately anxious or depressed	70	170	70	53	5.1	22.1		I have severe problems in walking about	I have slight problems washing or dressing myself	I have severe problems doing my usual activities	I have moderate pain or discomfort	I am moderately anxious or depressed	70	175	71	54	5.1	22.5
Female	41	not working	Married	Secondary	Non smoker	No	Some times	Normal	Not any	22.1	150	90	108	60	no	I have moderate problems in walking about	I have slight problems washing or dressing myself	I have slight problems doing my usual activities	I have moderate pain or discomfort	I am moderately anxious or depressed	40		I have no problems in walking about	I have no problems washing or dressing myself	I have no problems doing my usual activities	I have severe pain or discomfort	I am moderately anxious or depressed	50	155	90	52.6	5.1	21.9		I have severe problems in walking about	I have moderate problems washing or dressing myself	I have severe problems doing my usual activities	I have moderate pain or discomfort	I am moderately anxious or depressed	50	148	88	53	5.1	22.1
Male	45	Not capable of working	Married	Primary	Non smoker	No	No exercise	Low	Not any	24.6	150	90	96	96	yes	I have moderate problems in walking about	I have no problems washing or dressing myself	I have slight problems doing my usual activities	I have severe pain or discomfort	I am slightly anxious or depressed	60		I have severe problems in walking about	I have no problems washing or dressing myself	I have no problems doing my usual activities	I have severe pain or discomfort	I am moderately anxious or depressed	65	160	78	60	5.2	24.2		I have severe problems in walking about	I have moderate problems washing or dressing myself	I have severe problems doing my usual activities	I have moderate pain or discomfort	I am moderately anxious or depressed	68	150	90	60	5.2	24.2
Male	53	Not capable of working	Married	Secondary	Smoker	No	No exercise	Normal	Not any	24.9	170	100	144	54	no	I have severe problems in walking about	I have no problems washing or dressing myself	I have severe problems doing my usual activities	I have severe pain or discomfort	I am not anxious or depressed	30		I have severe problems in walking about	I have no problems washing or dressing myself	I have no problems doing my usual activities	I have severe pain or discomfort	I am moderately anxious or depressed	30	170	105	71	5.7	24.5		I have severe problems in walking about	I have severe problems washing or dressing myself	I have severe problems doing my usual activities	I have moderate pain or discomfort	I am moderately anxious or depressed	30	167	100	72	5.7	24.9
Female	45	Not capable of working	Married	Primary	Non smoker	No	No exercise	Low	Not any	30.4	160	100	180	108	yes	I have severe problems in walking about	I have slight problems washing or dressing myself	I have severe problems doing my usual activities	I have extreme pain or discomfort	I am not anxious or depressed	25		I have no problems in walking about	I have no problems washing or dressing myself	I am unable to do my usual activities	I have severe pain or discomfort	I am moderately anxious or depressed	30	150	91	81	5.4	30.7		I have severe problems in walking about	I have severe problems washing or dressing myself	I have severe problems doing my usual activities	I have moderate pain or discomfort	I am extremely anxious or depressed	30	155	95	81	5.4	30.7
Female	37	not working	Married	Secondary	Non smoker	No	Daily	Low	Diabetes mellitus	18.8	150	90	126	24	yes	I have moderate problems in walking about	I have no problems washing or dressing myself	I have severe problems doing my usual activities	I have no pain or discomfort	I am moderately anxious or depressed	50		I am unable to walk about	I have no problems washing or dressing myself	I am unable to do my usual activities	I have severe pain or discomfort	I am moderately anxious or depressed	55	160	90	50	5.4	18.8		I have moderate problems in walking about	I have severe problems washing or dressing myself	I have severe problems doing my usual activities	I have moderate pain or discomfort	I am extremely anxious or depressed	53	147	87	50	5.4	18.8
Female	47	not working	Married	Middle	Non smoker	No	No exercise	Normal	Not any	32.3	145	85	90	18	no	I have no problems in walking about	I have slight problems washing or dressing myself	I have moderate problems doing my usual activities	I have severe pain or discomfort	I am not anxious or depressed	65		I have severe problems in walking about	I have no problems washing or dressing myself	I have severe problems doing my usual activities	I have slight pain or discomfort	I am extremely anxious or depressed	60	147	85	81	5.2	32.7		I am unable to walk about	I have severe problems washing or dressing myself	I have severe problems doing my usual activities	I have moderate pain or discomfort	I am extremely anxious or depressed	68	143	84	82	5.2	33.1
Female	29	not working	Married	Middle	Non smoker	No	No exercise	Normal	Not any	29.8	190	85	36	54	yes	I have no problems in walking about	I have no problems washing or dressing myself	I have no problems doing my usual activities	I have severe pain or discomfort	I am slightly anxious or depressed	85		I have severe problems in walking about	I have no problems washing or dressing myself	I have no problems doing my usual activities	I have slight pain or discomfort	I am extremely anxious or depressed	85	200	85	56	4.5	29.8		I have slight problems in walking about	I have no problems washing or dressing myself	I have severe problems doing my usual activities	I have moderate pain or discomfort	I am extremely anxious or depressed	87	186	84	55	4.5	30.3
Female	44	not working	Married	Middle	Non smoker	No	Some times	Normal	Not any	28.8	170	85	120	72	no	I have slight problems in walking about	I have no problems washing or dressing myself	I have moderate problems doing my usual activities	I have slight pain or discomfort	I am not anxious or depressed	80		I have moderate problems in walking about	I have no problems washing or dressing myself	I have moderate problems doing my usual activities	I have moderate pain or discomfort	I am extremely anxious or depressed	80	173	80	82	5.6	29.2		I have slight problems in walking about	I have no problems washing or dressing myself	I have severe problems doing my usual activities	I have moderate pain or discomfort	I am extremely anxious or depressed	80	167	84	82	5.6	29.2
Male	49	Not capable of working		Middle	Non smoker	No	No exercise	Normal	Diabetes mellitus	20.2	140	79	66	3	yes	I have severe problems in walking about	I am unable to wash or dress myself	I am unable to do my usual activities	I have severe pain or discomfort	I am not anxious or depressed	40		I have slight problems in walking about	I have no problems washing or dressing myself	I have no problems doing my usual activities	I have moderate pain or discomfort	I am extremely anxious or depressed	45	154	80	62	5.9	20.2		I have slight problems in walking about	I have no problems washing or dressing myself	I have severe problems doing my usual activities	I have moderate pain or discomfort	I am extremely anxious or depressed	43	138	76	62	5.9	20.2
Female	59	Not capable of working	Married	Secondary	Ex-smoker	No	No exercise	Normal	Diabetes mellitus	20.6	190	80	132	72	yes	I have severe problems in walking about	I have slight problems washing or dressing myself	I am unable to do my usual activities	I have moderate pain or discomfort	I am not anxious or depressed	45		I have slight problems in walking about	I have no problems washing or dressing myself	I have no problems doing my usual activities	I have moderate pain or discomfort	I am extremely anxious or depressed	50	205	110	57	5.6	19.2		I have slight problems in walking about	I have no problems washing or dressing myself	I have severe problems doing my usual activities	I have moderate pain or discomfort	I am extremely anxious or depressed	50	186	80	56	5.6
Male	66	Not capable of working	Married	Not educated	Non smoker	No	No exercise	Normal	Diabetes mellitus, Hepatitis	22	150	85	18	48	no	I have slight problems in walking about	I have severe problems washing or dressing myself	I am unable to do my usual activities	I have severe pain or discomfort	I am extremely anxious or depressed	40		I have severe problems in walking about	I have no problems washing or dressing myself	I have no problems doing my usual activities	I have moderate pain or discomfort	I am extremely anxious or depressed	40	165	90	60	5.5	22		I have moderate problems in walking about	I have no problems washing or dressing myself	I have severe problems doing my usual activities	I have moderate pain or discomfort	I am extremely anxious or depressed	45	147	85	59	5.5	21.6
Female	41	Not capable of working	Married	Middle	Non smoker	No	Daily	Low	Hepatitis, Epilepsy	16.4	170	100	60	60	no	I have severe problems in walking about	I have no problems washing or dressing myself	I have severe problems doing my usual activities	I have severe pain or discomfort	I am moderately anxious or depressed	33		I have moderate problems in walking about	I have slight problems washing or dressing myself	I have moderate problems doing my usual activities	I have severe pain or discomfort	I am extremely anxious or depressed	35	170	96	41	5.3	16		I have moderate problems in walking about	I have no problems washing or dressing myself	I have severe problems doing my usual activities	I have moderate pain or discomfort	I am extremely anxious or depressed	35	168	96	41	5.3
Female	37	not working	Married	Not educated	Non smoker	No	No exercise	Normal	Not any	23.3	160	80	84	72	no	I have slight problems in walking about	I have no problems washing or dressing myself	I have moderate problems doing my usual activities	I have severe pain or discomfort	I am slightly anxious or depressed	60		I have severe problems in walking about	I have severe problems washing or dressing myself	I have moderate problems doing my usual activities	I have severe pain or discomfort	I am extremely anxious or depressed	60	160	80	55	5.1	23.3		I have moderate problems in walking about	I have no problems washing or dressing myself	I have severe problems doing my usual activities	I have moderate pain or discomfort	I am extremely anxious or depressed	64	157	81	55	5.1	22.9
Male	41	Not capable of working	Married	Not educated	Non smoker	No	No exercise	Low	Not any	21.1	170	98	60	336	yes	I have severe problems in walking about	I have moderate problems washing or dressing myself	I have severe problems doing my usual activities	I have severe pain or discomfort	I am moderately anxious or depressed	45		I have severe problems in walking about	I have moderate problems washing or dressing myself	I have severe problems doing my usual activities	I have severe pain or discomfort	I am extremely anxious or depressed	50	160	90	50	5	21.5		I have moderate problems in walking about	I have no problems washing or dressing myself	I have severe problems doing my usual activities	I have moderate pain or discomfort	I am extremely anxious or depressed	48	164	95	50	5	21.5
Female	42	Not capable of working	Married	Primary	Non smoker	No	Some times	Low	Not any	22.8	150	90	84	24	no	I have slight problems in walking about	I have no problems washing or dressing myself	I have severe problems doing my usual activities	I have severe pain or discomfort	I am slightly anxious or depressed	40		I have severe problems in walking about	I have moderate problems washing or dressing myself	I have severe problems doing my usual activities	I have severe pain or discomfort	I am extremely anxious or depressed	45	140	85	68	5.9	22.1		I have severe problems in walking about	I have no problems washing or dressing myself	I have severe problems doing my usual activities	I have severe pain or discomfort	I am extremely anxious or depressed	45	146	89	69	5.9
Female	53	Doing a job	Married	Secondary	Non smoker	No	No exercise	Low	Diabetes mellitus	25.4	170	90	120	60	no	I have slight problems in walking about	I have no problems washing or dressing myself	I have slight problems doing my usual activities	I have moderate pain or discomfort	I am slightly anxious or depressed	60		I have severe problems in walking about	I have severe problems washing or dressing myself	I have severe problems doing my usual activities	I have severe pain or discomfort	I am extremely anxious or depressed	65	169	86	65	5.1	25.4		I have severe problems in walking about	I have no problems washing or dressing myself	I have severe problems doing my usual activities	I have severe pain or discomfort	I am extremely anxious or depressed	64	165	84	66	5.1	27.5
Male	47	Not capable of working	Married	Middle	Ex-smoker	No	Some times	Low	Diabetes mellitus	27.9	163	91	168	48	yes	I have moderate problems in walking about	I have slight problems washing or dressing myself	I have severe problems doing my usual activities	I have severe pain or discomfort	I am slightly anxious or depressed	35		I have moderate problems in walking about	I have no problems washing or dressing myself	I have severe problems doing my usual activities	I have severe pain or discomfort	I am extremely anxious or depressed	40	165	88	68	5.1	28.3		I have no problems in walking about	I have no problems washing or dressing myself	I have severe problems doing my usual activities	I have severe pain or discomfort	I am extremely anxious or depressed	40	160	90	68	5.1	28.3
Male	45	Doing a job	Married	Graduate	Non smoker	No	No exercise	Normal	Hepatitis	22.1	160	85	96	12	yes	I have severe problems in walking about	I have severe problems washing or dressing myself	I am unable to do my usual activities	I have severe pain or discomfort	I am moderately anxious or depressed	50		I have slight problems in walking about	I have no problems washing or dressing myself	I have severe problems doing my usual activities	I have severe pain or discomfort	I am extremely anxious or depressed	55	150	85	75	6.1	21.8		I have slight problems in walking about	I have no problems washing or dressing myself	I have severe problems doing my usual activities	I have severe pain or discomfort	I am extremely anxious or depressed	54	158	82	75	6.1	21.8
Female	50	not working	Married	Primary	Non smoker	No	No exercise	Low	Diabetes mellitus, Hepatitis	18.1	200	85	12	4	yes	I have moderate problems in walking about	I have no problems washing or dressing myself	I have severe problems doing my usual activities	I have severe pain or discomfort	I am slightly anxious or depressed	60		I have severe problems in walking about	I have no problems washing or dressing myself	I have no problems doing my usual activities	I have severe pain or discomfort	I am extremely anxious or depressed	60	190	80	64	6.2	18.1		I have slight problems in walking about	I have no problems washing or dressing myself	I have severe problems doing my usual activities	I have severe pain or discomfort	I am extremely anxious or depressed	64	194	84	65	6.2
Female	38	Doing a job	Married	Higher secondary	Non smoker	No	No exercise	Low	Diabetes mellitus, Hepatitis	23.4	154	96	12	12	no	I have severe problems in walking about	I have severe problems washing or dressing myself	I am unable to do my usual activities	I have severe pain or discomfort	I am slightly anxious or depressed	45		I have severe problems in walking about	I have no problems washing or dressing myself	I have no problems doing my usual activities	I have severe pain or discomfort	I am extremely anxious or depressed	40	160	83	59	5.2	23.8		I have slight problems in walking about	I have no problems washing or dressing myself	I have severe problems doing my usual activities	I have severe pain or discomfort	I am extremely anxious or depressed	48	150	93	57	5.2	23
Male	51	not working	Married	Middle	Non smoker	No	No exercise	Normal	Hepatitis	29.9	148	88	18	18	no	I have severe problems in walking about	I have no problems washing or dressing myself	I have slight problems doing my usual activities	I have no pain or discomfort	I am moderately anxious or depressed	70		I have moderate problems in walking about	I have severe problems washing or dressing myself	I am unable to do my usual activities	I have severe pain or discomfort	I am extremely anxious or depressed	65	160	90	99	6	29.6		I have slight problems in walking about	I have no problems washing or dressing myself	I have severe problems doing my usual activities	I have severe pain or discomfort	I am extremely anxious or depressed	72	146	87	99	6	29.6
Female	37	Private business	Married	Secondary	Non smoker	No	Daily	Normal	Not any	20.9	150	75	36	36	no	I have slight problems in walking about	I have no problems washing or dressing myself	I have no problems doing my usual activities	I have slight pain or discomfort	I am moderately anxious or depressed	70		I have slight problems in walking about	I have severe problems washing or dressing myself	I am unable to do my usual activities	I have severe pain or discomfort	I am extremely anxious or depressed	75	165	81	79	6.5	20.7		I have slight problems in walking about	I have no problems washing or dressing myself	I have severe problems doing my usual activities	I have severe pain or discomfort	I am extremely anxious or depressed	72	147	74	78	6.5
Female	50	not working	Married	Primary	Non smoker	No	No exercise	Normal	Diabetes mellitus	21.5	154	74	66	6	no	I have moderate problems in walking about	I have no problems washing or dressing myself	I have moderate problems doing my usual activities	I have moderate pain or discomfort	I am slightly anxious or depressed	50		I am unable to walk about	I have no problems washing or dressing myself	I am unable to do my usual activities	I have severe pain or discomfort	I am extremely anxious or depressed	55	160	84	50	5	21.5		I have slight problems in walking about	I have no problems washing or dressing myself	I have severe problems doing my usual activities	I have severe pain or discomfort	I am extremely anxious or depressed	57	150	74	50	5	21.5
Female	62	Doing a job	Married	Secondary	Ex-smoker	No	No exercise	Low	Diabetes mellitus	24.6	149	70	210	3.5	yes	I have slight problems in walking about	I have no problems washing or dressing myself	I have severe problems doing my usual activities	I have moderate pain or discomfort	I am not anxious or depressed	60		I have severe problems in walking about	I have severe problems washing or dressing myself	I have slight problems doing my usual activities	I have extreme pain or discomfort	I am extremely anxious or depressed	57	140	70	65	5.4	24.6		I have moderate problems in walking about	I have no problems washing or dressing myself	I have severe problems doing my usual activities	I have severe pain or discomfort	I am extremely anxious or depressed	63	146	70	66	5.4	25
Female	27	not working	Married	Graduate	Non smoker	No	No exercise	Low	Not any	18.1	172	107	36	12	yes	I have slight problems in walking about	I have no problems washing or dressing myself	I have slight problems doing my usual activities	I have slight pain or discomfort	I am moderately anxious or depressed	75		I have moderate problems in walking about	I have moderate problems washing or dressing myself	I have severe problems doing my usual activities	I have extreme pain or discomfort	I am extremely anxious or depressed	75	150	85	44	5.2	17.7		I have moderate problems in walking about	I have no problems washing or dressing myself	I have severe problems doing my usual activities	I have severe pain or discomfort	I am extremely anxious or depressed	75	170	104	44	5.2	17.7
Female	28	not working	Single	Secondary	Non smoker	No	No exercise	Low	Not any	19	148	103	24	24	yes	I have slight problems in walking about	I have no problems washing or dressing myself	I have slight problems doing my usual activities	I have severe pain or discomfort	I am extremely anxious or depressed	60		I have severe problems in walking about	I have severe problems washing or dressing myself	I have severe problems doing my usual activities	I have extreme pain or discomfort	I am extremely anxious or depressed	65	155	95	47.5	5.2	19.2		I have severe problems in walking about	I have no problems washing or dressing myself	I have severe problems doing my usual activities	I have severe pain or discomfort	I am extremely anxious or depressed	64	145	100	48	5.2	19.4
Female	45	not working	Married	Secondary	Non smoker	No	No exercise	Normal	Diabetes mellitus, Hepatitis	28.2	137	50	336	36	yes	I have slight problems in walking about	I have no problems washing or dressing myself	I have no problems doing my usual activities	I have moderate pain or discomfort	I am not anxious or depressed	85		I have moderate problems in walking about	I have slight problems washing or dressing myself	I have severe problems doing my usual activities	I have no pain or discomfort	I am extremely anxious or depressed	80	144	70	69	5.2	27.8		I have no problems in walking about	I have no problems washing or dressing myself	I have severe problems doing my usual activities	I have severe pain or discomfort	I am extremely anxious or depressed	86	134	60	68	5.2
Male	69	Not capable of working	Married	Secondary	Non smoker	No	No exercise	Low	Diabetes mellitus	20.8	168	78	2.5	1	no	I have severe problems in walking about	I have no problems washing or dressing myself	I have slight problems doing my usual activities	I have moderate pain or discomfort	I am moderately anxious or depressed	50		I have slight problems in walking about	I have slight problems washing or dressing myself	I have severe problems doing my usual activities	I have no pain or discomfort	I am extremely anxious or depressed	50	148	73	50	5.1	20.8		I have no problems in walking about	I have no problems washing or dressing myself	I have no problems doing my usual activities	I have severe pain or discomfort	I am severely anxious or depressed	50	164	78	50	5.1	20.8
Female	46	Not capable of working	Married	Not educated	Smoker	No	No exercise	Low	Not any	19.6	140	75	66	66	no	I am unable to walk about	I am unable to wash or dress myself	I am unable to do my usual activities	I have severe pain or discomfort	I am slightly anxious or depressed	30		I have severe problems in walking about	I have no problems washing or dressing myself	I have no problems doing my usual activities	I have no pain or discomfort	I am extremely anxious or depressed	40	147	78	56	5.6	19.9		I have no problems in walking about	I have no problems washing or dressing myself	I have no problems doing my usual activities	I have severe pain or discomfort	I am severely anxious or depressed	35	137	75	56	5.6
Male	65	Retired	Married	Higher secondary	Ex-smoker	No	No exercise	Low	Not any	22.1	170	71	30	48	no	I have moderate problems in walking about	I have no problems washing or dressing myself	I have moderate problems doing my usual activities	I have slight pain or discomfort	I am not anxious or depressed	70		I have no problems in walking about	I have no problems washing or dressing myself	I am unable to do my usual activities	I have no pain or discomfort	I am extremely anxious or depressed	75	145	65	62	5.6	22.1		I have no problems in walking about	I have no problems washing or dressing myself	I have no problems doing my usual activities	I have severe pain or discomfort	I am severely anxious or depressed	75	167	74	63	5.6	22.4
Female	48	not working	Married	Not educated	Non smoker	No	Some times	Normal	Not any	20.3	170	85	150	48	no	I have no problems in walking about	I have no problems washing or dressing myself	I have no problems doing my usual activities	I have slight pain or discomfort	I am slightly anxious or depressed	85		I have severe problems in walking about	I have severe problems washing or dressing myself	I am unable to do my usual activities	I have no pain or discomfort	I am extremely anxious or depressed	80	190	95	56.5	5.6	20.1		I have no problems in walking about	I have no problems washing or dressing myself	I have no problems doing my usual activities	I have severe pain or discomfort	I am severely anxious or depressed	80	180	82	57	5.6	20.3
Female	37	Not capable of working	Married	Not educated	Non smoker	No	No exercise	Low	Hepatitis	22	167	98	192	12	no	I have moderate problems in walking about	I have slight problems washing or dressing myself	I have severe problems doing my usual activities	I have no pain or discomfort	I am extremely anxious or depressed	50		I have slight problems in walking about	I have no problems washing or dressing myself	I have slight problems doing my usual activities	I have slight pain or discomfort	I am severely anxious or depressed	50	143	80	59	5.5	21.6		I have moderate problems in walking about	I have no problems washing or dressing myself	I have no problems doing my usual activities	I have severe pain or discomfort	I am severely anxious or depressed	50	160	95	58	5.5	21.3
Female	50	not working	Married	Graduate	Non smoker	No	No exercise	Normal	Hepatitis	29.3	151	78	120	60	yes	I have slight problems in walking about	I have no problems washing or dressing myself	I have no problems doing my usual activities	I have no pain or discomfort	I am not anxious or depressed	50		I have moderate problems in walking about	I have slight problems washing or dressing myself	I have severe problems doing my usual activities	I have severe pain or discomfort	I am severely anxious or depressed	50	173	88	79	5.5	29		I have severe problems in walking about	I have no problems washing or dressing myself	I have no problems doing my usual activities	I have severe pain or discomfort	I am severely anxious or depressed	45	165	85	78	5.5
Male	43	Not capable of working	Married	Secondary	Non smoker	No	No exercise	Low	Hepatitis	21.1	157	79	96	96	yes	I have moderate problems in walking about	I have no problems washing or dressing myself	I have no problems doing my usual activities	I have severe pain or discomfort	I am extremely anxious or depressed	40		I have slight problems in walking about	I have no problems washing or dressing myself	I have severe problems doing my usual activities	I have severe pain or discomfort	I am severely anxious or depressed	50	160	76	55	5.3	21.5		I am unable to walk about	I am unable to wash or dress myself	I have moderate problems doing my usual activities	I have slight pain or discomfort	I am not anxious or depressed	45	150	73	56	5.3	21.9
Female	42	Doing a job	Married	Middle	Non smoker	No	No exercise	Low	Diabetes mellitus	26	150	80	48	12	no	I have severe problems in walking about	I have no problems washing or dressing myself	I have moderate problems doing my usual activities	I have extreme pain or discomfort	I am slightly anxious or depressed	25		I have severe problems in walking about	I have no problems washing or dressing myself	I am unable to do my usual activities	I have severe pain or discomfort	I am severely anxious or depressed	20	185	94	72	5.6	25.6		I have moderate problems in walking about	I have severe problems washing or dressing myself	I have severe problems doing my usual activities	I have moderate pain or discomfort	I am not anxious or depressed	30	170	85	70	5.6	24.9
Male	63	Not capable of working	Married	Secondary	Non smoker	No	No exercise	Low	Diabetes mellitus	27	176	81	60	18	yes	I have slight problems in walking about	I have slight problems washing or dressing myself	I have severe problems doing my usual activities	I have no pain or discomfort	I am moderately anxious or depressed	40		I have moderate problems in walking about	I have severe problems washing or dressing myself	I have severe problems doing my usual activities	I have no pain or discomfort	I am severely anxious or depressed	50	150	80	75	5.6	26.7		I have no problems in walking about	I have severe problems washing or dressing myself	I have severe problems doing my usual activities	I have moderate pain or discomfort	I am not anxious or depressed	40	160	89	74	5.6	26.3
Male	60	Private business	Married	Graduate	Smoker	No		Normal	Not any	25.5	162	70	24	8	no	I have no problems in walking about	I have no problems washing or dressing myself	I have no problems doing my usual activities	I have severe pain or discomfort	I am moderately anxious or depressed	60		I have severe problems in walking about	I have severe problems washing or dressing myself	I am unable to do my usual activities	I have no pain or discomfort	I am severely anxious or depressed	55	200	100	77	5.8	25.8		I have slight problems in walking about	I have no problems washing or dressing myself	I have severe problems doing my usual activities	I have moderate pain or discomfort	I am not anxious or depressed	50	182	78	77	5.8
Male	46	Private business	Married	Higher secondary	Ex-smoker	No	No exercise	Normal	Not any	27.9	155	80	12	7	yes	I have no problems in walking about	I have no problems washing or dressing myself	I have no problems doing my usual activities	I have moderate pain or discomfort	I am slightly anxious or depressed	80		I have moderate problems in walking about	I have no problems washing or dressing myself	I have slight problems doing my usual activities	I have slight pain or discomfort	I am not anxious or depressed	70	160	81	75	5.5	27.5		I have no problems in walking about	I have no problems washing or dressing myself	I have no problems doing my usual activities	I have severe pain or discomfort	I am not anxious or depressed	75	150	72	74	5.5	27.1
Female	45	Not capable of working	Married	Higher secondary	Smoker	No	No exercise	Normal	Hepatitis	25.6	144	75	24	24	yes	I have no problems in walking about	I have no problems washing or dressing myself	I have moderate problems doing my usual activities	I have moderate pain or discomfort	I am not anxious or depressed	70		I have moderate problems in walking about	I have no problems washing or dressing myself	I have slight problems doing my usual activities	I have slight pain or discomfort	I am not anxious or depressed	70	145	70	74	5.7	25.6		I have no problems in walking about	I have no problems washing or dressing myself	I have no problems doing my usual activities	I have severe pain or discomfort	I am not anxious or depressed	70	156	79	73	5.7	25.2
Female	55	not working	Married	Secondary	Non smoker	No	No exercise	Normal	Hepatitis	23	145	85	78	78	no	I have severe problems in walking about	I have no problems washing or dressing myself	I have moderate problems doing my usual activities	I have severe pain or discomfort	I am moderately anxious or depressed	50		I have moderate problems in walking about	I have no problems washing or dressing myself	I have slight problems doing my usual activities	I have slight pain or discomfort	I am not anxious or depressed	50	156	75	56	5.2	22.6		I have moderate problems in walking about	I have no problems washing or dressing myself	I have no problems doing my usual activities	I have severe pain or discomfort	I am not anxious or depressed	50	170	88	56	5.2	22.6
Male	62	Not capable of working	Married	Not educated	Non smoker	No	No exercise	Low	Diabetes mellitus, Hepatitis	20.8	162	70	240	132	yes	I have severe problems in walking about	I have severe problems washing or dressing myself	I am unable to do my usual activities	I have extreme pain or discomfort	I am extremely anxious or depressed	30		I have severe problems in walking about	I have no problems washing or dressing myself	I have slight problems doing my usual activities	I have slight pain or discomfort	I am not anxious or depressed	40	190	88	55	5.4	20.8		I have severe problems in walking about	I have no problems washing or dressing myself	I have no problems doing my usual activities	I have severe pain or discomfort	I am not anxious or depressed	35	180	76	55	5.4	20.8
Male	52	Not capable of working	Married	Graduate	Non smoker	No	No exercise		Not any	28.2	150	90	96	4	yes	I have moderate problems in walking about	I have severe problems washing or dressing myself	I have severe problems doing my usual activities	I have severe pain or discomfort	I am severely anxious or depressed	25		I have no problems in walking about	I have no problems washing or dressing myself	I have slight problems doing my usual activities	I have slight pain or discomfort	I am not anxious or depressed	30	160	93	70	5.2	28.2		I have slight problems in walking about	I have no problems washing or dressing myself	I have no problems doing my usual activities	I have severe pain or discomfort	I am not anxious or depressed	30	140	84	69	5.2	27.8
Male	55	not working	Married	Primary	Non smoker	No	No exercise	Low	Not any	29.7	140	75	54	2	yes	I have no problems in walking about	I have slight problems washing or dressing myself	I have severe problems doing my usual activities	I have no pain or discomfort	I am not anxious or depressed	60		I have severe problems in walking about	I have severe problems washing or dressing myself	I have moderate problems doing my usual activities	I have slight pain or discomfort	I am not anxious or depressed	60	150	80	59	4.8	29.2		I have severe problems in walking about	I am unable to wash or dress myself	I have no problems doing my usual activities	I have severe pain or discomfort	I am not anxious or depressed	55	140	75	58	4.8	28.7
Male	50	Not capable of working	Married	Primary	Non smoker	No	No exercise	Low	Not any	20.3	190	93	24	3	no	I am unable to walk about	I am unable to wash or dress myself	I am unable to do my usual activities	I have severe pain or discomfort	I am not anxious or depressed	20		I have slight problems in walking about	I have no problems washing or dressing myself	I have moderate problems doing my usual activities	I have slight pain or discomfort	I am not anxious or depressed	25	159	70	67	6	20		I am unable to walk about	I am unable to wash or dress myself	I have no problems doing my usual activities	I have severe pain or discomfort	I am not anxious or depressed	17	170	85	65	6	19.4
Female	46	not working	Married	Middle	Non smoker	No	No exercise	Low	Not any	21.3	150	85	66	60	no	I have no problems in walking about	I have no problems washing or dressing myself	I have slight problems doing my usual activities	I have no pain or discomfort	I am not anxious or depressed	80		I have moderate problems in walking about	I have no problems washing or dressing myself	I have moderate problems doing my usual activities	I have slight pain or discomfort	I am not anxious or depressed	75	175	85	61	5.6	21.7		I have slight problems in walking about	I have slight problems washing or dressing myself	I have no problems doing my usual activities	I have severe pain or discomfort	I am not anxious or depressed	70	155	88	62	5.6	22.1
Male	51	not working	Married	Secondary	Non smoker	No	No exercise	Normal	Diabetes mellitus, Hepatitis	22.8	186	72	240	12	yes	I have severe problems in walking about	I have severe problems washing or dressing myself	I have severe problems doing my usual activities	I have extreme pain or discomfort	I am extremely anxious or depressed	45		I have severe problems in walking about	I have no problems washing or dressing myself	I have severe problems doing my usual activities	I have slight pain or discomfort	I am not anxious or depressed	50	148	70	65	5.6	23.1		I have moderate problems in walking about	I have slight problems washing or dressing myself	I have no problems doing my usual activities	I have severe pain or discomfort	I am not anxious or depressed	50	165	67	67	5.6	23.8
Male	31	not working	Single	Not educated	Non smoker	No	Some times	Low	Hepatitis	21.2	170	90	7	2	yes	I have slight problems in walking about	I have no problems washing or dressing myself	I have severe problems doing my usual activities	I have moderate pain or discomfort	I am not anxious or depressed	70		I have slight problems in walking about	I have no problems washing or dressing myself	I have severe problems doing my usual activities	I have slight pain or discomfort	I am not anxious or depressed	65	180	83	66	5.9	21.5		I have moderate problems in walking about	I have slight problems washing or dressing myself	I have no problems doing my usual activities	I have severe pain or discomfort	I am not anxious or depressed	70	190	87	67	5.9	21.8
Female	50	not working	Married	Secondary	Non smoker	No	Some times	Low	Not any	23.8	170	110	96	2	no	I have slight problems in walking about	I have no problems washing or dressing myself	I have slight problems doing my usual activities	I have slight pain or discomfort	I am slightly anxious or depressed	50		I have slight problems in walking about	I have no problems washing or dressing myself	I have no problems doing my usual activities	I have slight pain or discomfort	I am not anxious or depressed	55	160	95	60	5.2	24.2		I have moderate problems in walking about	I have slight problems washing or dressing myself	I have no problems doing my usual activities	I have severe pain or discomfort	I am not anxious or depressed	55	150	90	61	5.2
Female	50	not working	Married	Middle	Non smoker	No	No exercise	Low	Hepatitis	23.8	140	90	24	24	no	I have no problems in walking about	I have no problems washing or dressing myself	I have no problems doing my usual activities	I have slight pain or discomfort	I am not anxious or depressed	90		I have no problems in walking about	I have no problems washing or dressing myself	I have no problems doing my usual activities	I have slight pain or discomfort	I am not anxious or depressed	90	140	80	59	5.3	23		I have severe problems in walking about	I have slight problems washing or dressing myself	I have no problems doing my usual activities	I have severe pain or discomfort	I am not anxious or depressed	90	149	90	58	5.3	22.7
Male	32	not working	Single	Middle	Non smoker	No	Some times	Low	Not any	15.7	140	80	120	120	yes	I have moderate problems in walking about	I have no problems washing or dressing myself	I have severe problems doing my usual activities	I have severe pain or discomfort	I am not anxious or depressed	25		I have no problems in walking about	I have no problems washing or dressing myself	I have no problems doing my usual activities	I have slight pain or discomfort	I am not anxious or depressed	30	150	85	44	5.6	15.7		I have no problems in walking about	I have slight problems washing or dressing myself	I have no problems doing my usual activities	I have severe pain or discomfort	I am not anxious or depressed	20	143	82	44	5.6	15.7
